# Supplementary material for: Spatiotemporal dynamics of soil phosphorus and crop uptake in global cropland during the 20th century
Source: Copernicus journal article supplement (doi:10.5194/bg-14-2055-2017), 2017-04-20
Supplement: Supplementary file 1 [file bg-14-2055-2017-supplement.zip]

# Supplement

## Spatiotemporal dynamics of soil phosphorus and crop uptake in global cropland during the twentieth century

Jie Zhang<sup>1</sup>, Arthur H.W.Beusen<sup>2,3</sup>, Dirk F.van Apeldoorn<sup>2,4</sup>, José M. Mogollón<sup>2</sup>, Chaoqing Yu<sup>1</sup>, Alexander F. Bouwman<sup>2,3</sup>

<sup>1</sup>Department of Earth System Science, Tsinghua University, Beijing, 100084, China

<sup>2</sup>Department of Earth Sciences-Geosciences, Faculty of Geosciences, Utrecht University, P.O.Box 80021, 3508 TA Utrecht, The Netherlands

<sup>3</sup>PBL Netherlands Environmental Assessment Agency, P.O.Box 30314, 2500 GH The Hague, The Netherlands

<sup>4</sup>Farming Systems Ecology, Wageningen University, P.O.Box 430, 6700 AK Wageningen, The Netherlands

*Correspondence to:* Chaoqing Yu ([chaoqingyu@tsinghua.edu.cn](mailto:chaoqingyu@tsinghua.edu.cn)); A. F. Bouwman ([a.f.bouwman@uu.nl](mailto:a.f.bouwman@uu.nl))

### Contents

S1. Statistics used

S2. Sensitivity analysis

S3. Tables

S4. Figures

S5. Movies

S6. Figures data

## S1. Statistics used

For the comparison between historical record of P uptake and model simulated P uptake of countries and regions, we used the coefficient of determination ( $R^2$ ) and the normalized root mean square error ( $NRMSE$ , equation S1):

$$NRMSE = \frac{100}{\overline{M}} \sqrt{\frac{\sum_{i=1}^n (M_i - S_i)^2}{n}}$$

(S1)

Where  $S_i$  is the simulated value,  $M_i$  is the measured value,  $\overline{M}$  is the average of the measured values and  $n$  is the number of data pairs. The  $NRMSE$  is the coefficient of variance, which estimates the average deviation between simulations and measurements (Wallach et al., 2006). It is an unbounded measure which shows the (normalized) relative size of the average difference (Willmott, 1982). For the global scale, we consider  $NRMSE \leq 50\%$  to be acceptable following Beusen et al. (2015).

## S2. Sensitivity analysis

### S2.1 Method

In this study, the sensitivity of the modelled  $LP$ ,  $SP$  and crop *uptake* to variations of 12 model parameters ( $n = 12$ , Eq. S2) were investigated for two years (1950 and 2000) based on parameter-specific distributions between the minimum and maximum range around the standard parameter values (Table 2). The Latin Hypercube Sampling (LHS) method, which is a stratified sampling method, was implemented by subdividing the range of each of the  $n$  parameters into disjunct equiprobable intervals ( $Num = 150$ , Eq. S2) and subsequently getting a specific parameter value from each interval and each run, based on the assumed uniform distribution within each interval (Saltelli et al., 2004; Saltelli et al., 2000; Helton and Davis, 2003). For each parameter  $i$ , we obtained  $Num$  sampled values. The sampled values of different model parameters were randomly paired. The parameter space was thus sampled

with a limited number of representative samples, consisting  $Num$  combinations of  $n$  parameters

The uncertainty contributions of the input parameters to the model outputs can be further analyzed by combining LHS with linear regression, since the model output  $Y$  (here  $LP$ ,  $SP$  and  $uptake$ ) is approximated by a linear function of the parameters  $X_i$ :

$$Y = \beta_0 + \sum_{i=1}^n (\beta_i X_i) + e \quad (S2)$$

where  $\beta_i$  are ordinary regression coefficients,  $e$  is the error of the approximation. The coefficient of determination ( $R^2$ ) was used to evaluate the linear regression model, which is the variation in  $Y$  as explained by  $Y - e$ . The regression coefficients  $\beta_i$  depend on the scale and dimension of  $X_i$ . Therefore, we use the standardized regression coefficient ( $SRC_i$ ) which normalizes  $\beta_i$  using standard deviations for  $Y(\sigma_Y)$  and  $X(\sigma_{X_i})$  as follows:

$$SRC_i = \beta_i \frac{\sigma_{X_i}}{\sigma_Y} \quad (S3)$$

$SRC_i$  can assume values  $[-1,1]$  and represents the relative change in  $Y$  ( $\Delta Y/\sigma_Y$ ) due to the relative change in  $X$  ( $\Delta X_i/\sigma_{X_i}$ ) with respect to their standard deviations.  $SRC_i$  is thus independent of the units, scale and size of the parameters. A positive  $SRC_i$  implies a positive relationship, whereby a higher parameter value leads to a higher model output. Negative  $SRC_i$  indicate a negative relationship, whereas a higher parameter value induces a decreased model output.

The sum of squares of  $SRC_i$  values of all parameters is equal to  $R^2$ .  $SRC_i^2/R^2$  is thus the contribution of variation of  $X_i$  to variation of  $Y$ . For example, an  $X_i$  with  $SRC_i = 0.1$  adds 0.01 or 1% to  $Y$  for  $R^2 = 1$  (i.e. a perfect fit). We calculated the  $SRC$  for 12 parameters in the DPPS model. Parameters with  $SRC$  values exceeding 0.2 and less than -0.2 are considered to be significantly influence the model (green for positive values  $> 0.2$ , red for negative values  $< -$

0.2, see Table S4), with a minimal contribution of  $0.2^2 = 0.04$  or 4% contribution to the variation of global results. This analysis can be conducted for country, region to global levels.

## **S2.2 Results (see Table S4 in excel file Zhang\_Table\_S4.xlsx)**

Results from the sensitivity analysis revealed that the main parameters influencing the model outputs are the initial labile and stable soil P pools, *max\_uptake*, *fr\_mobile* and *init\_recovery* (Table S4).

At the global scale, the initial LP content from virgin soil (*LP\_yang*), is the most important factor for global LP pool both in 1950 and 2000. *Fertilizer* is an important factor in 2000 but not in 1950, as the application of chemical fertilizers had not yet begun its exponential increase. Likewise, the initial total P content from virgin soil (*TP\_yang*) exerts an important influence on the SP pool size. This influence is largest in 1950 in all regions, and in 2000 this influence is decreasing in industrialized countries due to the increasing impact of fertilizer and manure inputs on the pool sizes of both LP and SP (Table S4).

In all regions and countries, *max\_uptake* and *fr\_mobile* are important factors controlling crop uptake, with SRC values for *max\_uptake* ranging from 0.29 to 0.60, and for *fr\_mobile* from 0.42 to 0.57 in 2000. In 1950, *max\_uptake* is an important globally, whereas *fr\_mobile* only in certain regions. The importance of *init\_recovery* increases with time, from SRC values often around 0.2 in 1950 to a range from 0.46 to 0.58 in 2000 (Table S4). *Fertilizer* is not important for uptake in 1950, but in 2000 it is important in industrialized countries and a number of transition countries like Brazil, Korea and China,. Likewise, the LP size is also increasingly important for crop P uptake, with values increasing from low in a range of countries in 1950 to 0.26-0.48 in 2000.

### S3. Tables

Table S1. Region definition.

| Region # | Country name                         | ISO | Region name          |
|----------|--------------------------------------|-----|----------------------|
| 1        | CANADA                               | 124 | Canada               |
| 2        | SAINT PIERRE AND MIQUELON            | 666 | USA                  |
| 2        | UNITED STATES                        | 840 | USA                  |
| 2        | UNITED STATES MINOR OUTLYING ISLANDS | 581 | USA                  |
| 3        | MEXICO                               | 484 | Mexico               |
| 4        | ANGUILLA                             | 660 | Rest Central America |
| 4        | ANTIGUA AND BARBUDA                  | 28  | Rest Central America |
| 4        | ARUBA                                | 533 | Rest Central America |
| 4        | BAHAMAS                              | 44  | Rest Central America |
| 4        | BARBADOS                             | 52  | Rest Central America |
| 4        | BELIZE                               | 84  | Rest Central America |
| 4        | BERMUDA                              | 60  | Rest Central America |
| 4        | CAYMAN ISLANDS                       | 136 | Rest Central America |
| 4        | COSTA RICA                           | 188 | Rest Central America |
| 4        | CUBA                                 | 192 | Rest Central America |
| 4        | DOMINICA                             | 212 | Rest Central America |
| 4        | DOMINICAN REPUBLIC                   | 214 | Rest Central America |
| 4        | EL SALVADOR                          | 222 | Rest Central America |
| 4        | GRENADA                              | 308 | Rest Central America |
| 4        | GUADELOUPE                           | 312 | Rest Central America |
| 4        | GUATEMALA                            | 320 | Rest Central America |
| 4        | HAITI                                | 332 | Rest Central America |
| 4        | HONDURAS                             | 340 | Rest Central America |
| 4        | JAMAICA                              | 388 | Rest Central America |
| 4        | MARTINIQUE                           | 474 | Rest Central America |
| 4        | MONTSERRAT                           | 500 | Rest Central America |
| 4        | NETHERLANDS ANTILLES                 | 530 | Rest Central America |
| 4        | NICARAGUA                            | 558 | Rest Central America |
| 4        | PANAMA                               | 591 | Rest Central America |
| 4        | PUERTO RICO                          | 630 | Rest Central America |
| 4        | SAINT KITTS AND NEVIS                | 659 | Rest Central America |
| 4        | SAINT LUCIA                          | 662 | Rest Central America |
| 4        | SAINT VINCENT AND THE GRENADINES     | 670 | Rest Central America |
| 4        | TRINIDAD AND TOBAGO                  | 780 | Rest Central America |
| 4        | TURKS AND CAICOS ISLANDS             | 796 | Rest Central America |
| 4        | VIRGIN ISLANDS_BRITISH               | 92  | Rest Central America |
| 4        | VIRGIN ISLANDS_U.S.                  | 850 | Rest Central America |
| 5        | BRAZIL                               | 76  | Brazil               |
| 6        | ARGENTINA                            | 32  | Rest South America   |
| 6        | BOLIVIA                              | 68  | Rest South America   |
| 6        | BOUVET ISLAND                        | 74  | Rest South America   |
| 6        | CHILE                                | 152 | Rest South America   |
| 6        | COLOMBIA                             | 170 | Rest South America   |
| 6        | ECUADOR                              | 218 | Rest South America   |
| 6        | FALKLANDS ISLANDS (MALVINAS)         | 238 | Rest South America   |

|   |                                              |     |                    |
|---|----------------------------------------------|-----|--------------------|
| 6 | FRENCH GUIANA                                | 254 | Rest South America |
| 6 | GUYANA                                       | 328 | Rest South America |
| 6 | PARAGUAY                                     | 600 | Rest South America |
| 6 | PERU                                         | 604 | Rest South America |
| 6 | SOUTH GEORGIA AND THE SOUTH SANDWICH ISLANDS | 239 | Rest South America |
| 6 | SURINAME                                     | 740 | Rest South America |
| 6 | URUGUAY                                      | 858 | Rest South America |
| 6 | VENEZUELA                                    | 862 | Rest South America |
| 7 | ALGERIA                                      | 12  | NorthernAfrica     |
| 7 | EGYPT                                        | 818 | NorthernAfrica     |
| 7 | LIBYAN ARAB JAMAHIRIYA                       | 434 | NorthernAfrica     |
| 7 | MOROCCO                                      | 504 | NorthernAfrica     |
| 7 | TUNISIA                                      | 788 | NorthernAfrica     |
| 7 | WESTERN SAHARA                               | 732 | NorthernAfrica     |
| 8 | BENIN                                        | 204 | Western Africa     |
| 8 | BURKINA FASO                                 | 854 | Western Africa     |
| 8 | CAMEROON                                     | 120 | Western Africa     |
| 8 | CAPE VERDE                                   | 132 | Western Africa     |
| 8 | CENTRAL AFRICAN REPUBLIC                     | 140 | Western Africa     |
| 8 | CHAD                                         | 148 | Western Africa     |
| 8 | CONGO                                        | 178 | Western Africa     |
| 8 | CONGO_THE DEMOCRATIC REPUBLIC OF THE         | 180 | Western Africa     |
| 8 | CÔTE D'IVOIRE                                | 384 | Western Africa     |
| 8 | EQUATORIAL GUINEA                            | 226 | Western Africa     |
| 8 | GABON                                        | 266 | Western Africa     |
| 8 | GAMBIA                                       | 270 | Western Africa     |
| 8 | GHANA                                        | 288 | Western Africa     |
| 8 | GUINEA                                       | 324 | Western Africa     |
| 8 | GUINEA-BISSAU                                | 624 | Western Africa     |
| 8 | LIBERIA                                      | 430 | Western Africa     |
| 8 | MALI                                         | 466 | Western Africa     |
| 8 | MAURITANIA                                   | 478 | Western Africa     |
| 8 | NIGER                                        | 562 | Western Africa     |
| 8 | NIGERIA                                      | 566 | Western Africa     |
| 8 | SAINT HELENA                                 | 654 | Western Africa     |
| 8 | SAO TOME AND PRINCIPE                        | 678 | Western Africa     |
| 8 | SENEGAL                                      | 686 | Western Africa     |
| 8 | SIERRA LEONE                                 | 694 | Western Africa     |
| 8 | TOGO                                         | 768 | Western Africa     |
| 9 | BURUNDI                                      | 108 | EasternAfrica      |
| 9 | COMOROS                                      | 174 | EasternAfrica      |
| 9 | DJIBOUTI                                     | 262 | EasternAfrica      |
| 9 | ERITREA                                      | 232 | EasternAfrica      |
| 9 | ETHIOPIA                                     | 231 | EasternAfrica      |
| 9 | KENYA                                        | 404 | EasternAfrica      |
| 9 | MADAGASCAR                                   | 450 | EasternAfrica      |
| 9 | MAURITIUS                                    | 480 | EasternAfrica      |
| 9 | MAYOTTE                                      | 175 | EasternAfrica      |
| 9 | RÉUNION                                      | 638 | EasternAfrica      |
| 9 | RWANDA                                       | 646 | EasternAfrica      |

|    |                                            |     |                 |
|----|--------------------------------------------|-----|-----------------|
| 9  | SEYCHELLES                                 | 690 | EasternAfrica   |
| 9  | SOMALIA                                    | 706 | EasternAfrica   |
| 9  | SUDAN                                      | 736 | EasternAfrica   |
| 9  | UGANDA                                     | 800 | EasternAfrica   |
| 10 | SOUTH AFRICA                               | 710 | Southern Africa |
| 11 | ANDORRA                                    | 20  | Western Europe  |
| 11 | AUSTRIA                                    | 40  | Western Europe  |
| 11 | BELGIUM                                    | 56  | Western Europe  |
| 11 | DENMARK                                    | 208 | Western Europe  |
| 11 | FAROE ISLANDS                              | 234 | Western Europe  |
| 11 | FINLAND                                    | 246 | Western Europe  |
| 11 | FRANCE                                     | 250 | Western Europe  |
| 11 | GERMANY                                    | 276 | Western Europe  |
| 11 | GIBRALTAR                                  | 292 | Western Europe  |
| 11 | GREECE                                     | 300 | Western Europe  |
| 11 | HOLY SEE (VATICAN CITY STATE)              | 336 | Western Europe  |
| 11 | ICELAND                                    | 352 | Western Europe  |
| 11 | IRELAND                                    | 372 | Western Europe  |
| 11 | ITALY                                      | 380 | Western Europe  |
| 11 | LIECHTENSTEIN                              | 438 | Western Europe  |
| 11 | LUXEMBOURG                                 | 442 | Western Europe  |
| 11 | MONACO                                     | 492 | Western Europe  |
| 11 | NETHERLANDS                                | 528 | Western Europe  |
| 11 | NORWAY                                     | 578 | Western Europe  |
| 11 | PORTUGAL                                   | 620 | Western Europe  |
| 11 | SAN MARINO                                 | 674 | Western Europe  |
| 11 | SPAIN                                      | 724 | Western Europe  |
| 11 | SVALBARD AND JAN MAYEN                     | 744 | Western Europe  |
| 11 | SWEDEN                                     | 752 | Western Europe  |
| 11 | SWITZERLAND                                | 756 | Western Europe  |
| 11 | UNITED KINGDOM                             | 826 | Western Europe  |
| 12 | ALBANIA                                    | 8   | Central Europe  |
| 12 | BOSNIA AND HERZEGOVINA                     | 70  | Central Europe  |
| 12 | BULGARIA                                   | 100 | Central Europe  |
| 12 | CROATIA                                    | 191 | Central Europe  |
| 12 | CYPRUS                                     | 196 | Central Europe  |
| 12 | CZECH REPUBLIC                             | 203 | Central Europe  |
| 12 | ESTONIA                                    | 233 | Central Europe  |
| 12 | HUNGARY                                    | 348 | Central Europe  |
| 12 | LATVIA                                     | 428 | Central Europe  |
| 12 | LITHUANIA                                  | 440 | Central Europe  |
| 12 | MACEDONIA_ THE FORMER YUGOSLAV REPUBLIC OF | 807 | Central Europe  |
| 12 | MALTA                                      | 470 | Central Europe  |
| 12 | POLAND                                     | 616 | Central Europe  |
| 12 | ROMANIA                                    | 642 | Central Europe  |
| 12 | SLOVAKIA                                   | 703 | Central Europe  |
| 12 | SLOVENIA                                   | 705 | Central Europe  |
| 12 | YUGOSLAVIA                                 | 891 | Central Europe  |
| 13 | TURKEY                                     | 792 | Turkey          |

|    |                                       |     |                  |
|----|---------------------------------------|-----|------------------|
| 14 | BELARUS                               | 112 | Ukraine +        |
| 14 | MOLDOVA_REPUBLIC OF                   | 498 | Ukraine +        |
| 14 | UKRAINE                               | 804 | Ukraine +        |
| 15 | KAZAKSTAN                             | 398 | Asia-Stan        |
| 15 | KYRGYZSTAN                            | 417 | Asia-Stan        |
| 15 | TAJIKISTAN                            | 762 | Asia-Stan        |
| 15 | TURKMENISTAN                          | 795 | Asia-Stan        |
| 15 | UZBEKISTAN                            | 860 | Asia-Stan        |
| 16 | ARMENIA                               | 51  | Russia +         |
| 16 | AZERBAIJAN                            | 31  | Russia +         |
| 16 | GEORGIA                               | 268 | Russia +         |
| 16 | RUSSIAN FEDERATION                    | 643 | Russia +         |
| 17 | BAHRAIN                               | 48  | Middle East      |
| 17 | IRAN_ISLAMIC REPUBLIC OF              | 364 | Middle East      |
| 17 | IRAQ                                  | 368 | Middle East      |
| 17 | ISRAEL                                | 376 | Middle East      |
| 17 | JORDAN                                | 400 | Middle East      |
| 17 | KUWAIT                                | 414 | Middle East      |
| 17 | LEBANON                               | 422 | Middle East      |
| 17 | OMAN                                  | 512 | Middle East      |
| 17 | QATAR                                 | 634 | Middle East      |
| 17 | SAUDI ARABIA                          | 682 | Middle East      |
| 17 | SYRIAN ARAB REPUBLIC                  | 760 | Middle East      |
| 17 | UNITED ARAB EMIRATES                  | 784 | Middle East      |
| 17 | YEMEN                                 | 887 | Middle East      |
| 18 | INDIA                                 | 356 | India            |
| 19 | KOREA_DEMOCRATIC PEOPLE'S REPUBLIC OF | 408 | Korea            |
| 19 | KOREA_REPUBLIC OF                     | 410 | Korea            |
| 20 | CHINA                                 | 156 | China +          |
| 20 | HONG KONG                             | 344 | China +          |
| 20 | MACAU                                 | 446 | China +          |
| 20 | MONGOLIA                              | 496 | China +          |
| 20 | TAIWAN_PROVINCE OF CHINA              | 158 | China +          |
| 21 | BRUNEI DARUSSALAM                     | 96  | SoutheasternAsia |
| 21 | CAMBODIA                              | 116 | SoutheasternAsia |
| 21 | LAO PEOPLE'S DEMOCRATIC REPUBLIC      | 418 | SoutheasternAsia |
| 21 | MALAYSIA                              | 458 | SoutheasternAsia |
| 21 | MYANMAR                               | 104 | SoutheasternAsia |
| 21 | PHILIPPINES                           | 608 | SoutheasternAsia |
| 21 | SINGAPORE                             | 702 | SoutheasternAsia |
| 21 | THAILAND                              | 764 | SoutheasternAsia |
| 21 | VIET NAM                              | 704 | SoutheasternAsia |
| 22 | EAST TIMOR                            | 626 | Indonesia +      |
| 22 | INDONESIA                             | 360 | Indonesia +      |
| 22 | PAPUA NEW GUINEA                      | 598 | Indonesia +      |

|                                                            |                                   |     |                      |
|------------------------------------------------------------|-----------------------------------|-----|----------------------|
| 23                                                         | JAPAN                             | 392 | Japan                |
| 24                                                         | AMERICAN SAMOA                    | 16  | Oceania              |
| 24                                                         | AUSTRALIA                         | 36  | Oceania              |
| 24                                                         | CHRISTMAS ISLAND                  | 162 | Oceania              |
| 24                                                         | COCOS (KEELING) ISLANDS           | 166 | Oceania              |
| 24                                                         | COOK ISLANDS                      | 184 | Oceania              |
| 24                                                         | FIJI                              | 242 | Oceania              |
| 24                                                         | FRENCH POLYNESIA                  | 258 | Oceania              |
| 24                                                         | FRENCH SOUTHERN TERRITORIES       | 260 | Oceania              |
| 24                                                         | GUAM                              | 316 | Oceania              |
| 24                                                         | HEARD ISLAND AND MCDONALD ISLANDS | 334 | Oceania              |
| 24                                                         | KIRIBATI                          | 296 | Oceania              |
| 24                                                         | MARSHALL ISLANDS                  | 584 | Oceania              |
| 24                                                         | MICRONESIA_FEDERATED STATES OF    | 583 | Oceania              |
| 24                                                         | NAURU                             | 520 | Oceania              |
| 24                                                         | NEW CALEDONIA                     | 540 | Oceania              |
| 24                                                         | NEW ZEALAND                       | 554 | Oceania              |
| 24                                                         | NIUE                              | 570 | Oceania              |
| 24                                                         | NORFOLK ISLAND                    | 574 | Oceania              |
| 24                                                         | NORTHERN MARIANA ISLANDS          | 580 | Oceania              |
| 24                                                         | PALAU                             | 585 | Oceania              |
| 24                                                         | PITCAIRN                          | 612 | Oceania              |
| 24                                                         | SAMOA                             | 882 | Oceania              |
| 24                                                         | SOLOMON ISLANDS                   | 90  | Oceania              |
| 24                                                         | TOKELAU                           | 772 | Oceania              |
| 24                                                         | TONGA                             | 776 | Oceania              |
| 24                                                         | TUVALU                            | 798 | Oceania              |
| 24                                                         | VANUATU                           | 548 | Oceania              |
| 24                                                         | WALLIS AND FUTUNA                 | 876 | Oceania              |
| 25                                                         | AFGANISTAN                        | 4   | Rest Southern Asia   |
| 25                                                         | BANGLADESH                        | 50  | Rest Southern Asia   |
| 25                                                         | BHUTAN                            | 64  | Rest Southern Asia   |
| 25                                                         | BRITISH INDIAN OCEAN TERRITORY    | 86  | Rest Southern Asia   |
| 25                                                         | MALDIVES                          | 462 | Rest Southern Asia   |
| 25                                                         | NEPAL                             | 524 | Rest Southern Asia   |
| 25                                                         | PAKISTAN                          | 586 | Rest Southern Asia   |
| 25                                                         | SRI LANKA                         | 144 | Rest Southern Asia   |
| 26                                                         | ANGOLA                            | 24  | Rest Southern Africa |
| 26                                                         | BOTSWANA                          | 72  | Rest Southern Africa |
| 26                                                         | LESOTHO                           | 426 | Rest Southern Africa |
| 26                                                         | MALAWI                            | 454 | Rest Southern Africa |
| 26                                                         | MOZAMBIQUE                        | 508 | Rest Southern Africa |
| 26                                                         | NAMIBIA                           | 516 | Rest Southern Africa |
| 26                                                         | SWAZILAND                         | 748 | Rest Southern Africa |
| 26                                                         | TANZANIA_UNITED REPUBLIC OF       | 834 | Rest Southern Africa |
| 26                                                         | ZAMBIA                            | 894 | Rest Southern Africa |
| 26                                                         | ZIMBABWE                          | 716 | Rest Southern Africa |
| Greenland and Antarctica are not included in the datafiles |                                   |     |                      |
|                                                            | GREENLAND                         | 304 | Greenland            |
|                                                            | ANTARCTICA                        | 10  | Antarctica           |

Table S2. P excretion rates for livestock in IMAGE-GNM.

| Category           | P excretion in kg head <sup>-1</sup> year <sup>-1</sup> |
|--------------------|---------------------------------------------------------|
| 1. Beef cattle     | 10.5 <sup>a</sup> /8.7 <sup>b</sup> /7.0 <sup>c</sup>   |
| 2. Dairy cattle    | 22.7 <sup>a</sup> /17.5 <sup>b</sup> /10.5 <sup>c</sup> |
| 3. Buffaloes       | 7.9                                                     |
| 4. Pigs            | 1.8                                                     |
| 5. Poultry         | 0.1                                                     |
| 6. Sheep and goats | 1.5                                                     |
| 7. Horses          | 7.3 <sup>d</sup> /6.5 <sup>c</sup>                      |
| 8. Asses           | 4.4                                                     |
| 9. Mules           | 4.4                                                     |
| 10. Camels         | 8.0                                                     |

<sup>a</sup> = Canada, USA, Japan;

<sup>b</sup> = OECD Europe;

<sup>d</sup> = Canada, USA, OECD Europe, Japan;

<sup>c</sup> = all other countries.

Table S3. Crop groups used as a basis for calculating crop P uptake, P content on dry matter basis, and dry matter content.

| Crops | Name             | P<br>content<br>(-) | Dry<br>matter<br>(-) |
|-------|------------------|---------------------|----------------------|
| 1     | Wheat            | 0.0034              | 0.880                |
| 2     | Rice             | 0.0025              | 0.880                |
| 3     | Maize            | 0.0029              | 0.880                |
| 4     | Barley           | 0.0036              | 0.880                |
| 5     | Millet           | 0.0030              | 0.850                |
| 6     | Sorghum          | 0.0030              | 0.850                |
| 7     | Other cereals    | 0.0031              | 0.870                |
| 8     | Potato           | 0.0005              | 0.212                |
| 9     | Sweet potato     | 0.0003              | 0.272                |
| 10    | Cassava          | 0.0004              | 0.326                |
| 11    | Other root crops | 0.0004              | 0.270                |
| 12    | Plantain         | 0.0003              | 0.653                |
| 13    | Sugar beet       | 0.0004              | 0.260                |
| 14    | Sugar cane       | 0.0004              | 0.232                |
| 15    | Pulses           | 0.0025              | 0.850                |
| 16    | Vegetables       | 0.0003              | 0.070                |
| 17    | Banana           | 0.0002              | 0.257                |
| 18    | Citrus           | 0.0001              | 0.103                |
| 19    | Fruit crops      | 0.0001              | 0.131                |
| 20    | Oil crops        | 0.0050              | 0.920                |
| 21    | Rapeseed         | 0.0056              | 0.910                |
| 22    | Oil palm         | 0.0031              | 0.940                |
| 23    | Soybean          | 0.0050              | 0.850                |
| 24    | Groundnut        | 0.0042              | 0.942                |
| 25    | Sunflower        | 0.0045              | 0.920                |
| 26    | Sesame seed      | 0.0056              | 0.940                |
| 27    | Coconut          | 0.0004              | 0.896                |
| 28    | Cocoa            | 0.0026              | 1                    |
| 29    | Coffee           | 0.0022              | 1                    |
| 30    | Tea              | 0.0150              | 0.525                |
| 31    | Tobacco          | 0.0006              | 0.21                 |
| 32    | Cotton           | 0.0053              | 0.92                 |
| 33    | Fiber crops      | 0.0095              | 1                    |
| 34    | Rubber           | 0.0000              | 1                    |

Table S4. Sensitivity results of world regions and selected countries.

This table showed the detailed results of model sensitivity analysis. See separate Excel file "Zhang\_Table\_S4.xlsx"

## S4. Figures

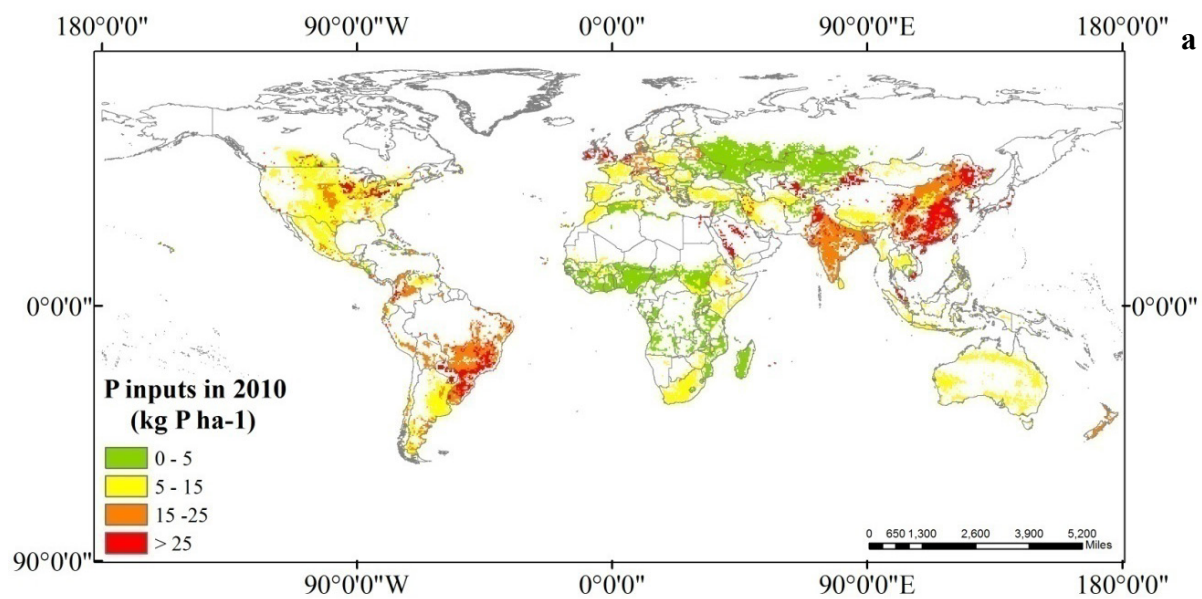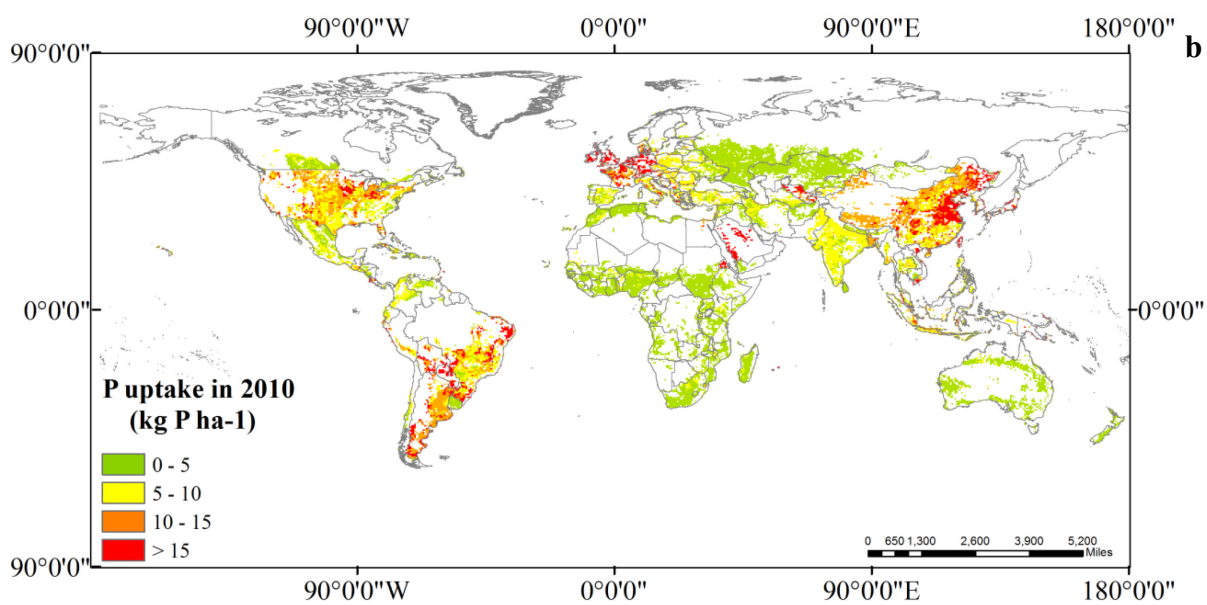

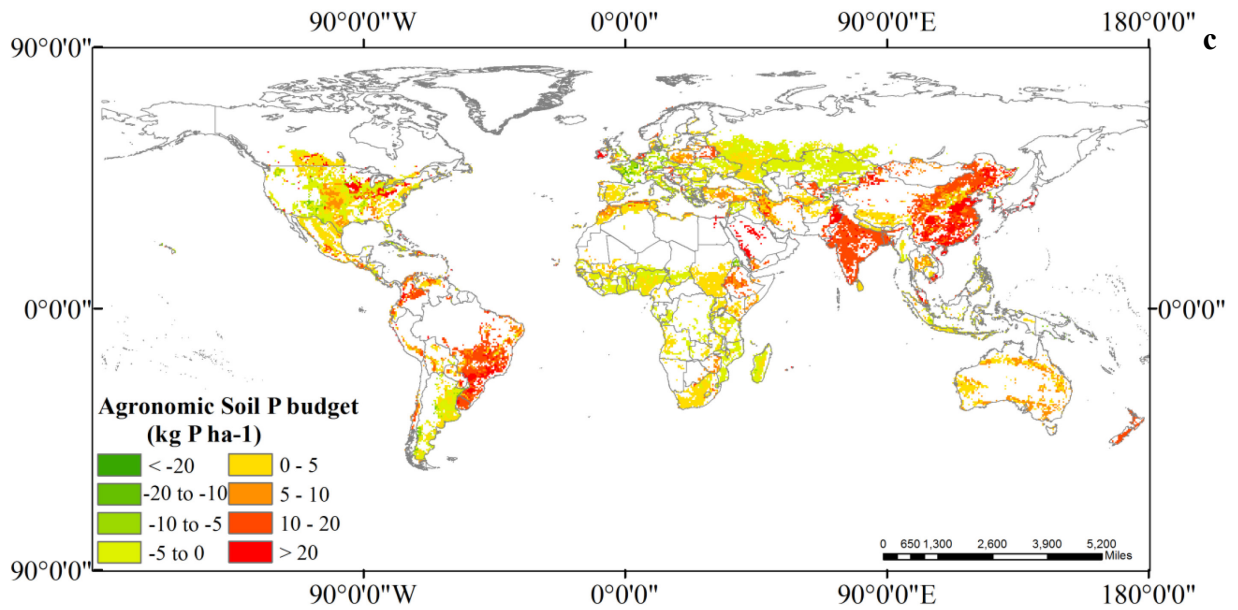

Figure S1. Global P inputs (a), uptake (b) and agronomic P budget (c) for cropland in 2010. Inputs per hectare refer to mineral fertilizer and manure; uptake is the P withdrawal in harvested parts of crops and agronomic P budget per hectare is the difference between inputs and uptake, which is different from soil P budget, since deposition and runoff are not included in agronomic P budget. We can produce the grid maps for every year for the period 1900-2010 and here we only show 2010 as an example.

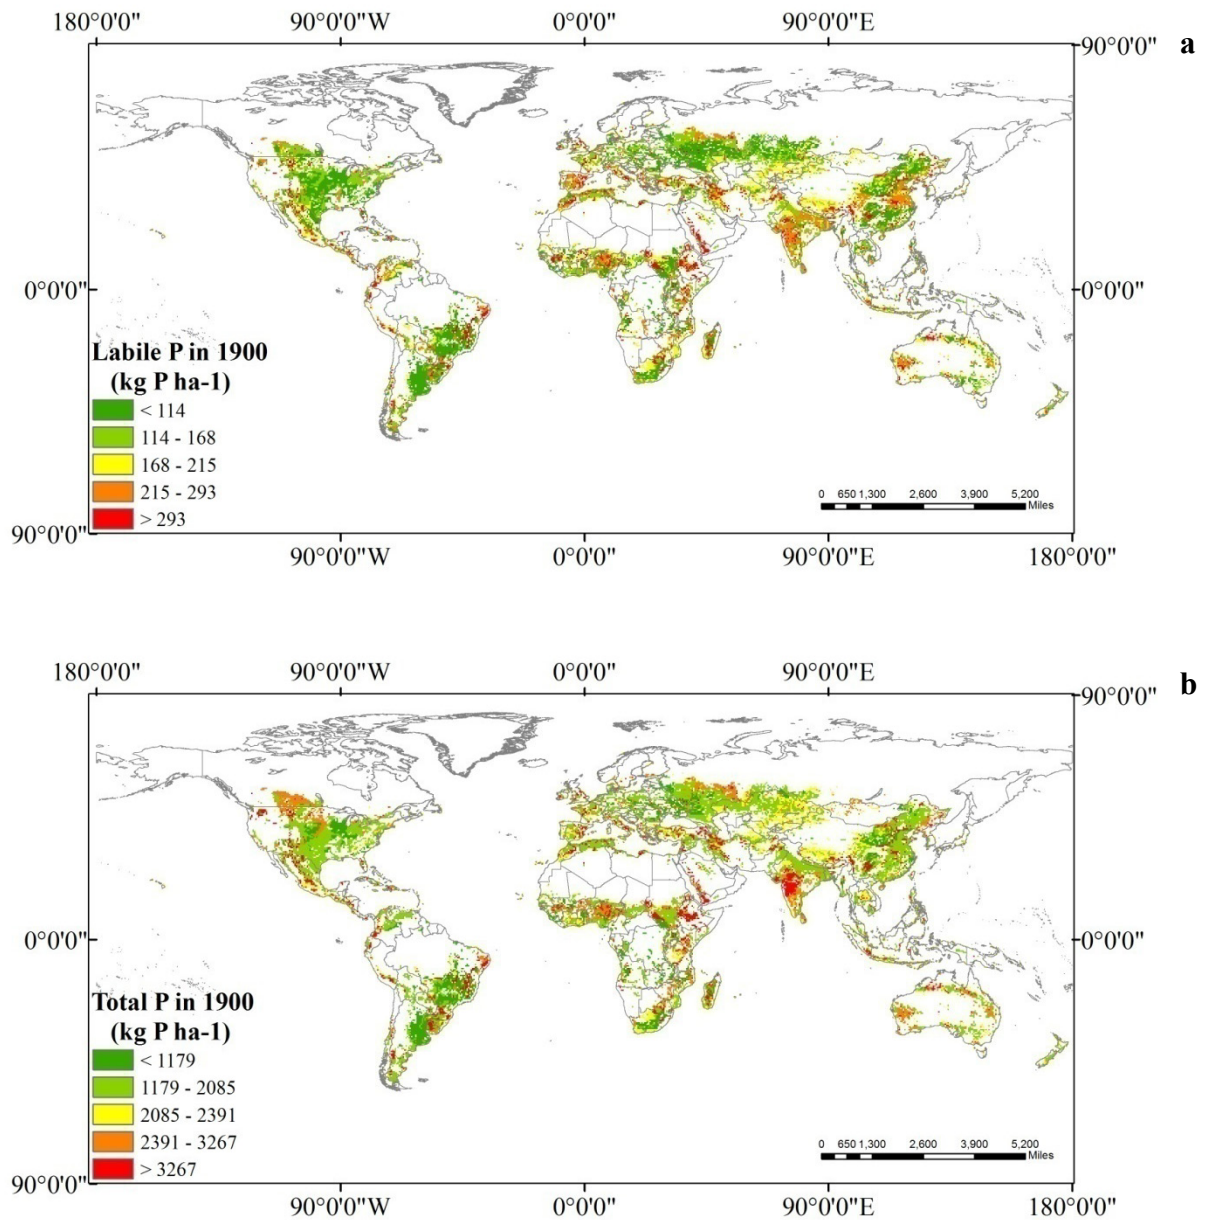

Figure S2. The global distribution of labile and total P in global agricultural land soils in 1900. We can produce the grid maps for every year for the period 1900-2010 and here we only show 1900 as an example.

## **S5. Movies**

Movie S1. Labile Phosphorus (LP) pool distribution in  $\text{kg P ha}^{-1}$  for all grid cells of the global cropland, presented with 4-year intervals for the period 1900-2010.

Movie S2. Stable Phosphorus (SP) pool distribution in  $\text{kg P ha}^{-1}$  for all grid cells of the global cropland, presented with 4-year intervals for the period 1900-2010

Movie S3. Crop P uptake in  $\text{kg P ha}^{-1}$  for all grid cells of the global cropland, presented with 4-year intervals for the period 1900-2010

## **S6. Figures data**

The supplement zip file includes the directory “Figures data”, which contains the asci files for Figures 2-5, Figure 6 (a, b, c), Figure SI1 (a, b, c) and SI2 (a, b).

## References

- Beusen, A., Van Beek, L., Bouwman, L., Mogollón, J., and Middelburg, J.: Coupling global models for hydrology and nutrient loading to simulate nitrogen and phosphorus retention in surface water—description of IMAGE–GNM and analysis of performance, *Geoscientific model development*, 8, 4045-4067, 2015.
- Helton, J. C., and Davis, F. J.: Latin hypercube sampling and the propagation of uncertainty in analyses of complex systems, *Reliability Engineering & System Safety*, 81, 23-69, 2003.
- Saltelli, A., Chan, K., and Scott, E. M.: *Sensitivity analysis*, Wiley and Sons, Chichester, 2000.
- Saltelli, A., Tarantola, S., Campolongo, F., and Ratto, M.: *Sensitivity analysis in practice. A guide to assessing scientific models*, Wiley and Sons, Chichester, 2004.
- Wallach, D., Makowski, D., and Jones, J.: *Working with dynamic crop models: Evaluation, Analysis, Parameterization and Applications*. Elsevier BV, 2006.
- Willmott, C. J.: Some comments on the evaluation of model performance, *Bulletin of the American Meteorological Society*, 63, 1309-1313, 1982.
