# Supplementary material for: Spatiotemporal dynamics of soil phosphorus and crop uptake in global cropland during the 20th century
Source: Copernicus journal article supplement (doi:10.5194/bg-14-2055-2017), 2017-04-20
Supplement: Supplementary file 2 [file bg-14-2055-2017-supplement.zip]

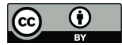

## *Supplement of*

# **Spatiotemporal dynamics of soil phosphorus and crop uptake in global cropland during the 20th century**

**Jie Zhang et al.**

*Correspondence to:* Chaoqing Yu (chaoqingyu@tsinghua.edu.cn) and Alexander F. Bouwman (a.f.bouwman@uu.nl)

- bg-14-2055-2017-supplement-title-page.pdf
- Figures data
  - Zhang\_etal\_Figure\_6a.asc
  - Zhang\_etal\_Figure\_6b.asc
  - Zhang\_etal\_Figure\_6c.asc
  - Zhang\_etal\_Figure\_SI1a.asc
  - Zhang\_etal\_Figure\_SI1b.asc
  - Zhang\_etal\_Figure\_SI1c.asc
  - Zhang\_etal\_Figure\_SI2a.asc
  - Zhang\_etal\_Figure\_SI2b.asc
  - Zhang\_etal\_Figures\_2-3-4-5-7.xlsx
- LP.gif
- SP.gif
- Zhang\_Table\_S4.xlsx
- Zhang\_etal\_Supplement.pdf
- uptake.gif

The copyright of individual parts of the supplement might differ from the CC-BY 3.0 licence.
