# Supplementary material for: Spatiotemporal dynamics of soil phosphorus and crop uptake in global cropland during the 20th century
Source: Copernicus journal article supplement (doi:10.5194/bg-14-2055-2017), 2017-04-20
Supplement: Supplementary file 3 [file bg-14-2055-2017-supplement.zip]

Archive with 16 entries (15 files):
- bg-14-2055-2017-supplement-title-page.pdf
- Figures data/
- Figures data/Zhang_etal_Figures_2-3-4-5-7.xlsx
- Figures data/Zhang_etal_Figure_SI1b.asc
- Figures data/Zhang_etal_Figure_SI2a.asc
- Figures data/Zhang_etal_Figure_6c.asc
- Figures data/Zhang_etal_Figure_SI1c.asc
- Figures data/Zhang_etal_Figure_6a.asc
- Figures data/Zhang_etal_Figure_SI2b.asc
- Figures data/Zhang_etal_Figure_6b.asc
- Figures data/Zhang_etal_Figure_SI1a.asc
- Zhang_etal_Supplement.pdf
- LP.gif
- Zhang_Table_S4.xlsx
- uptake.gif
- SP.gif
