# Supplementary material for: Spatiotemporal dynamics of soil phosphorus and crop uptake in global cropland during the 20th century
Source: Copernicus journal article supplement (doi:10.5194/bg-14-2055-2017), 2017-04-20
Supplement: Supplementary file 3 [file bg-14-2055-2017-supplement.zip › Figures data/Zhang_etal_Figures_2-3-4-5-7.xlsx]

## Sheet: figure 2 and figure 4
	Western Euorpe				North America				Africa				Asia				South America				Oceania				China				US				South Africa				France
Year	Inputs(kg P/ha)	Historical Uptake(kg P/ha)	Simulated Uptake(kg P/ha)		Inputs	Historical Uptake	Simulated Uptake		Inputs	Historical Uptake	Simulated Uptake		Inputs	Historical Uptake	Simulated Uptake		Inputs	Historical Uptake	Simulated Uptake		Inputs	Historical Uptake	Simulated Uptake		Inputs	Historical Uptake	Simulated Uptake		Inputs	Historical Uptake	Simulated Uptake		Inputs	Historical Uptake	Simulated Uptake		Inputs	Historical Uptake	Simulated Uptake
1900	4.37198	3.92345	3.66282		1.39328	1.61626	2.82121		0.9529	1.49086	0.75768		3.14429	2.58365	2.34933		5.25268	4.36957	2.91288		10.3979	3.15599	1.07215		0.83761	2.81749	2.72482		1.53747	1.82536	3.05038		4.80721	4.6834	1.57506		3.08813	3.34621	3.59084
1910	4.16201	3.74931	3.71919		1.22999	1.42684	2.82456		0.88923	1.39116	0.77297		3.00154	2.46061	2.36053		3.45917	3.159	3.23409		6.05471	1.75276	1.13936		0.81098	2.72789	2.69111		1.3253	1.57346	3.02226		3.18583	3.10378	1.60835		3.10147	3.36067	3.59849
1920	4.1247	3.73563	3.68802		1.11203	1.29	2.76415		0.80658	1.26166	0.77918		2.80794	2.3227	2.34206		2.1601	2.07446	3.13917		2.41435	0.93635	1.14464		0.78546	2.64205	2.68246		1.25624	1.49147	3.01222		2.2888	2.22985	1.59783		3.33276	3.61129	3.60436
1930	3.96545	3.60742	3.67233		1.03601	1.20181	2.73717		0.7286	1.13892	0.78519		2.57715	2.18204	2.32728		1.4417	1.38454	2.94638		2.15989	0.83764	1.13878		0.76805	2.58347	2.67571		1.19436	1.418	3.00566		1.63611	1.59397	1.58627		3.2315	3.50157	3.60602
1940	13.5357	4.57654	3.87442		4.10914	2.60461	2.82898		1.53817	1.62406	0.8028		4.73052	3.03393	2.346		3.01117	3.05426	3.53657		11.3056	1.58173	1.20185		1.20878	3.53812	2.68561		4.829	3.03116	3.11677		6.04339	2.62818	1.6556		10.1846	4.71549	3.73759
1950	13.2914	4.47729	3.86707		3.84027	2.43417	2.83278		1.3675	1.44352	0.82144		4.38918	2.88579	2.36054		3.04159	3.08512	3.32584		10.1225	1.41668	1.20756		1.20374	3.52337	2.68355		4.55215	2.85736	3.13357		4.06285	1.76687	1.63602		10.2704	4.75517	3.77146
1960	20.3351	4.89414	6.80299		6.64696	3.39748	4.54138		2.12696	1.73766	1.84807		3.87511	3.35109	3.91829		5.15594	4.47426	5.35309		13.3403	1.52941	2.00787		3.10442	4.37211	5.22323		7.9058	4.0407	5.35217		5.68624	2.42233	2.58761		21.4339	4.48233	6.93777
1970	22.5363	8.0021	9.6201		10.2358	5.10981	5.90872		3.22078	2.4369	2.1119		6.79984	4.73141	4.92822		6.84914	4.80817	5.30339		12.212	1.87412	2.39098		9.14265	8.13342	7.79093		12.1588	5.6798	6.65083		11.8894	3.38982	3.15588		28.0056	8.47998	11.2384
1980	24.4106	10.7507	11.7258		11.8475	6.94421	7.27447		4.45557	2.45642	2.38607		10.9279	5.62259	5.77325		13.8717	5.75679	6.12341		10.7422	2.19376	2.38309		17.7337	9.71925	9.6239		13.3365	7.77598	8.19075		16.9932	4.90195	4.24811		30.4507	12.7912	15.1583
1990	20.5728	13.6893	13.5419		9.60587	7.5962	7.7361		4.46253	2.95701	2.56984		16.8557	7.06748	6.96708		11.2287	7.436	7.37001		7.6458	2.18865	2.6642		25.3491	10.8111	10.7202		10.7124	8.54089	8.7526		10.7843	4.45039	4.11488		27.4989	19.0079	19.0257
2000	16.2038	15.3944	13.4899		10.8953	9.17787	8.34472		4.20741	3.13607	2.68703		19.6713	8.41666	8.23198		16.8827	9.20328	8.52226		13.0172	3.69963	3.27204		33.3991	11.691	12.823		12.4419	10.5362	9.54882		7.48905	3.9717	4.10508		19.0501	21.5068	19.1524
2010	10.7932	16.6413	12.8366		10.1964	9.64412	8.67913		5.30057	3.72057	2.88993		22.3031	10.0444	8.93481		22.6643	12.5753	10.7308		10.8704	3.19732	3.10143		31.1132	13.3037	13.425		11.4088	11.0321	9.95635		7.81709	4.26364	4.07834		9.50921	21.821	17.5543

## Sheet: figure 3
Global regions			Global countries			Western Europe			North America			Africa			Asia			South America			Oceania			China			US			South Africa			South Africa
Historical P uptake(Mt P/yr)	Simulated P uptake(Mt P/yr)		Historical P uptake(Mt P/yr)	Simulated P uptake(Mt P/yr)		Historical P uptake(Mt P/yr)	Simulated P uptake(Mt P/yr)		Historical P uptake(Mt P/yr)	Simulated P uptake(Mt P/yr)		Historical P uptake(Mt P/yr)	Simulated P uptake(Mt P/yr)		Historical P uptake(Mt P/yr)	Simulated P uptake(Mt P/yr)		Historical P uptake(Mt P/yr)	Simulated P uptake(Mt P/yr)		Historical P uptake(Mt P/yr)	Simulated P uptake(Mt P/yr)		Historical P uptake(Mt P/yr)	Simulated P uptake(Mt P/yr)		Historical P uptake(Mt P/yr)	Simulated P uptake(Mt P/yr)		Historical P uptake(Mt P/yr)	Simulated P uptake(Mt P/yr)		Historical P uptake(Mt P/yr)	Simulated P uptake(Mt P/yr)
61.7089	91.4368		9.90073	9.67275		490.943	682.423		799.897	1069.25		290.218	308.658		1422.29	1663.03		305.878	365.959		43.3857	56.9583		456.313	545.145		738.188	977.816		31.6811	33.8428		96.0743	148.704
98.1447	127.245		10.8308	10.1856		572.49	766.971		960.296	1213.22		315.86	327.421		1623.45	1807.83		344.875	403.379		53.6482	66.354		561.179	619.976		862.151	1085.98		35.6029	36.3575		119.756	176.475
134.581	155.575		11.7609	10.6742		654.036	839.969		1120.7	1345.85		341.503	345.476		1824.61	1943.08		383.871	441.529		63.9107	76.1097		666.044	687.692		986.115	1190.28		39.5246	38.8521		143.437	199.597
154.683	168.627		11.8264	11.5202		704.348	876.596		1204.58	1408.03		364.324	355.088		1926.59	2018.62		404.222	455.976		69.3299	82.7538		717.884	722.971		1049.9	1239.41		41.695	39.8603		156.268	209.933
158.452	170.419		11.0274	12.7679		723.425	884.736		1211.95	1409.97		384.322	353.46		1929.33	2041.57		405.927	449.903		69.9059	85.9835		716.651	729.599		1053.5	1239.55		42.114	39.5913		158.247	211.008
162.221	172.102		10.2283	14.0938		742.502	892.633		1219.33	1412.79		404.321	350.398		1932.1	2066.11		407.631	449.616		70.4818	89.9199		715.454	734.984		1057.11	1240.69		42.5329	39.5976		160.226	212.344
161.684	173.032		11.0278	13.6633		800.913	923.356		1319.55	1459.14		413.932	380.827		2018.68	2177.46		450.194	488.331		74.7889	98.4023		770.794	791.842		1157.87	1286.1		49.7684	43.8509		193.828	225.772
158.986	174.7		13.7286	13.1761		822.785	949.565		1335.49	1497.62		432.126	410.553		2177.47	2291.3		495.254	527.724		83.7746	106.242		840.056	853.015		1176.5	1322.92		50.6427	47.9997		198.809	237.693
182.194	178.925		14.7581	13.2494		794.002	983.129		1436.46	1569.64		438.462	428.252		2252.18	2390.23		524.94	564.58		81.2207	109.437		864.534	900.919		1254.26	1390.72		55.8673	51.3773		178.657	249.73
187.838	186.59		14.0287	13.8477		936.875	1033.79		1595.1	1665.56		446.355	434.231		2455.2	2483.37		549.791	601.622		98.5941	110.569		954.482	940.729		1407.27	1478.97		59.5245	54.0534		219.409	267.172
193.132	193.762		12.4186	14.3907		989.944	1079.74		1669.41	1752.83		453.264	440.282		2518.73	2587.08		602.387	640.751		103.142	112.043		1004.29	995.267		1476.28	1559.07		65.5481	56.8051		239.084	283.33
215.325	197.775		11.5225	14.5166		1031.69	1149.67		1626.93	1809.2		464.286	458.898		2816.72	2760.04		640.226	712.845		111.393	121.122		1143.65	1095.51		1411.6	1611.43		61.2723	59.9787		251.586	313.244
210.715	202.152		10.751	14.6198		1116.01	1210.6		1607.93	1867.52		482.075	475.984		3078.85	2943.3		688.223	767.366		131.65	130.334		1285.34	1203.42		1397.22	1665.37		53.5737	61.6487		286.998	338.141
213.696	205.318		8.26767	14.5491		1231.52	1235.66		1982.11	1880.26		528.872	492.485		3063.81	3089.19		919.772	798.211		119.093	135.363		1311.43	1265.3		1768.41	1674.94		58.7774	61.3303		334.114	344.103
189.969	207.625		8.70917	14.3685		1233.82	1235.58		1754.43	1864.75		565.055	508.143		3242.95	3257.98		924.503	814.428		116.692	137.174		1351.69	1349.27		1564.46	1657.13		65.2015	59.2432		352.909	338.833
215.972	209.691		7.60661	14.1544		1242.28	1228.9		1823.42	1859.51		602.76	523.846		3481.67	3432.21		831.729	824.349		113.291	137.907		1448.78	1436.6		1607.45	1649.82		62.2277	57.5363		334.431	334.744
218.651	213.502		7.44418	13.739		1235.86	1203.87		1815.77	1869.16		612.315	546.367		3655.6	3596.36		904.992	851.884		121.312	138.513		1526.84	1547.67		1597.12	1655.65		52.8263	59.0559		380.179	329.598
226.88	217.631		9.5571	13.3107		1189.41	1178.04		1841.72	1885.37		621.419	568.704		3784.45	3714.78		968.198	894.847		137.898	137.778		1598.99	1631.03		1614.84	1667.74		57.0876	60.8699		341.753	323.173
237.63	220.428		9.67719	13.1881		1235.22	1170.69		1969.15	1904.31		666.224	586.769		4032.3	3878.38		971.918	937.48		167.023	143.164		1729.06	1747.76		1731.52	1683.89		59.2189	62.2597		345.19	322.599
248.736	221.313		11.4431	13.383		1304.1	1172.69		2109.04	1919.39		694.714	600.655		4189.81	4054.5		1051.79	986.119		177.864	155.21		1800.86	1859.23		1860.3	1698.08		61.1213	63.2983		389.788	325.761
237.148	221.142		5.91649	13.58		1329.94	1165.4		2112.64	1924.26		717.559	614.824		4294.37	4200.15		1108.22	1026.22		188.548	166.756		1770.16	1941.56		1875.5	1703.11		62.222	64.3115		366.074	325.999
202.251	224.375		10.9284	13.2862		1296.24	1150.46		2091.28	1955.26		765.211	639.84		4322.31	4303.4		1248.08	1087.01		171.028	164.6		1739.83	1984.79		1889.03	1730.88		62.1233	64.3387		360.23	318.713
249.626	227.877		10.2159	13.0146		1330.28	1137.77		2260.03	1986.45		836.874	664.15		4617.84	4377.73		1386.39	1181.14		189.321	162.121		1831.25	1990.41		2010.41	1758.57		63.8799	64.2148		350.37	312.9
260.178	231.002		13.4519	13.0904		1364.11	1120.09		2339.43	2002.02		890.486	695.594		4962.45	4520.52		1454.89	1258.07		165.199	162.099		1971.75	2044.92		2079.25	1771.02		64.8867	63.4282		352.271	306.682
262.992	234.364		12.1198	13.5207		1359.16	1099.18		2295.4	1994.22		941.946	735.479		5314.1	4721.8		1570.53	1351.76		163.036	163.299		2105.79	2142.26		2032.41	1759.86		63.6173	62.5712		346.924	300.593
268.091	236.354		17.858	13.9719		1395.46	1076.41		2193.05	1975.9		995.689	776.764		5563.6	4948.98		1651.93	1409.63		168.235	163.19		2225.07	2245.36		1924.96	1739.54		64.5637	61.7578		361.5	290.815
738.188	977.816		1.45916	1.6398		--	--		--	--		--	--		--	--		--	--		--	--		--	--		--	--		--	--		--	--
862.151	1085.98		1.80224	1.88086		--	--		--	--		--	--		--	--		--	--		--	--		--	--		--	--		--	--		--	--
986.115	1190.28		2.14532	2.127		--	--		--	--		--	--		--	--		--	--		--	--		--	--		--	--		--	--		--	--
1049.9	1239.41		2.49545	2.42598		--	--		--	--		--	--		--	--		--	--		--	--		--	--		--	--		--	--		--	--
1053.51	1239.55		2.85263	2.81068		--	--		--	--		--	--		--	--		--	--		--	--		--	--		--	--		--	--		--	--
1057.12	1240.69		3.20981	3.23683		--	--		--	--		--	--		--	--		--	--		--	--		--	--		--	--		--	--		--	--
1157.89	1286.1		3.05953	3.42637		--	--		--	--		--	--		--	--		--	--		--	--		--	--		--	--		--	--		--	--
1176.51	1322.92		3.35292	3.60922		--	--		--	--		--	--		--	--		--	--		--	--		--	--		--	--		--	--		--	--
1254.28	1390.72		4.03453	3.78519		--	--		--	--		--	--		--	--		--	--		--	--		--	--		--	--		--	--		--	--
1407.29	1478.97		4.34883	3.92964		--	--		--	--		--	--		--	--		--	--		--	--		--	--		--	--		--	--		--	--
1476.3	1559.07		4.20834	4.06963		--	--		--	--		--	--		--	--		--	--		--	--		--	--		--	--		--	--		--	--
1411.62	1611.43		4.50154	4.4368		--	--		--	--		--	--		--	--		--	--		--	--		--	--		--	--		--	--		--	--
1397.24	1665.37		4.75746	4.81558		--	--		--	--		--	--		--	--		--	--		--	--		--	--		--	--		--	--		--	--
1768.43	1674.94		5.75604	4.95804		--	--		--	--		--	--		--	--		--	--		--	--		--	--		--	--		--	--		--	--
1564.48	1657.13		5.53569	5.05001		--	--		--	--		--	--		--	--		--	--		--	--		--	--		--	--		--	--		--	--
1607.47	1649.82		5.1483	5.11233		--	--		--	--		--	--		--	--		--	--		--	--		--	--		--	--		--	--		--	--
1597.14	1655.65		3.77323	4.9802		--	--		--	--		--	--		--	--		--	--		--	--		--	--		--	--		--	--		--	--
1614.86	1667.74		4.35122	4.83947		--	--		--	--		--	--		--	--		--	--		--	--		--	--		--	--		--	--		--	--
1731.54	1683.89		4.37919	4.77931		--	--		--	--		--	--		--	--		--	--		--	--		--	--		--	--		--	--		--	--
1860.32	1698.08		4.4283	4.78477		--	--		--	--		--	--		--	--		--	--		--	--		--	--		--	--		--	--		--	--
1875.51	1703.11		4.78083	4.81604		--	--		--	--		--	--		--	--		--	--		--	--		--	--		--	--		--	--		--	--
1889.04	1730.88		3.76488	4.93894		--	--		--	--		--	--		--	--		--	--		--	--		--	--		--	--		--	--		--	--
2010.42	1758.57		5.03822	5.17808		--	--		--	--		--	--		--	--		--	--		--	--		--	--		--	--		--	--		--	--
2079.26	1771.02		6.02203	5.40272		--	--		--	--		--	--		--	--		--	--		--	--		--	--		--	--		--	--		--	--
2032.42	1759.86		6.35899	5.58524		--	--		--	--		--	--		--	--		--	--		--	--		--	--		--	--		--	--		--	--
1924.97	1739.54		7.6185	5.79401		--	--		--	--		--	--		--	--		--	--		--	--		--	--		--	--		--	--		--	--
49.8616	62.1974		4.45613	6.05638		--	--		--	--		--	--		--	--		--	--		--	--		--	--		--	--		--	--		--	--
62.3412	71.3283		5.63801	7.09751		--	--		--	--		--	--		--	--		--	--		--	--		--	--		--	--		--	--		--	--
74.8207	79.0203		6.81989	7.97025		--	--		--	--		--	--		--	--		--	--		--	--		--	--		--	--		--	--		--	--
81.8562	82.7567		7.52016	8.32465		--	--		--	--		--	--		--	--		--	--		--	--		--	--		--	--		--	--		--	--
83.4475	83.4578		7.73882	8.20165		--	--		--	--		--	--		--	--		--	--		--	--		--	--		--	--		--	--		--	--
85.0389	84.3411		7.95748	7.98844		--	--		--	--		--	--		--	--		--	--		--	--		--	--		--	--		--	--		--	--
89.3398	88.7251		8.74126	9.07074		--	--		--	--		--	--		--	--		--	--		--	--		--	--		--	--		--	--		--	--
95.9239	93.4167		6.49093	10.1261		--	--		--	--		--	--		--	--		--	--		--	--		--	--		--	--		--	--		--	--
97.4369	98.9045		8.54354	10.6647		--	--		--	--		--	--		--	--		--	--		--	--		--	--		--	--		--	--		--	--
106.59	104.358		5.90182	10.7131		--	--		--	--		--	--		--	--		--	--		--	--		--	--		--	--		--	--		--	--
117.531	109.754		8.46171	10.8188		--	--		--	--		--	--		--	--		--	--		--	--		--	--		--	--		--	--		--	--
128.871	115.437		6.15639	12.121		--	--		--	--		--	--		--	--		--	--		--	--		--	--		--	--		--	--		--	--
135.144	120.18		7.23168	13.3466		--	--		--	--		--	--		--	--		--	--		--	--		--	--		--	--		--	--		--	--
137.62	124.759		14.7198	14.2334		--	--		--	--		--	--		--	--		--	--		--	--		--	--		--	--		--	--		--	--
129.095	128.693		8.8424	14.5188		--	--		--	--		--	--		--	--		--	--		--	--		--	--		--	--		--	--		--	--
133.048	131.815		10.6781	14.6345		--	--		--	--		--	--		--	--		--	--		--	--		--	--		--	--		--	--		--	--
137.706	136.154		19.636	14.4857		--	--		--	--		--	--		--	--		--	--		--	--		--	--		--	--		--	--		--	--
143.864	140.728		7.0151	14.424		--	--		--	--		--	--		--	--		--	--		--	--		--	--		--	--		--	--		--	--
152.928	143.265		19.0995	14.2816		--	--		--	--		--	--		--	--		--	--		--	--		--	--		--	--		--	--		--	--
154.644	145.125		14.955	14.2526		--	--		--	--		--	--		--	--		--	--		--	--		--	--		--	--		--	--		--	--
161.86	147.46		10.6651	14.2076		--	--		--	--		--	--		--	--		--	--		--	--		--	--		--	--		--	--		--	--
176.136	152.8		14.6522	15.0979		--	--		--	--		--	--		--	--		--	--		--	--		--	--		--	--		--	--		--	--
181.274	159.786		23.2274	15.933		--	--		--	--		--	--		--	--		--	--		--	--		--	--		--	--		--	--		--	--
186.516	163.178		22.3864	16.7848		--	--		--	--		--	--		--	--		--	--		--	--		--	--		--	--		--	--		--	--
187.083	162.747		16.1602	17.7015		--	--		--	--		--	--		--	--		--	--		--	--		--	--		--	--		--	--		--	--
188.677	163.529		26.179	18.6507		--	--		--	--		--	--		--	--		--	--		--	--		--	--		--	--		--	--		--	--
73.8037	54.5535		0	0		--	--		--	--		--	--		--	--		--	--		--	--		--	--		--	--		--	--		--	--
74.5879	59.514		0	0		--	--		--	--		--	--		--	--		--	--		--	--		--	--		--	--		--	--		--	--
75.3722	64.6596		0	0		--	--		--	--		--	--		--	--		--	--		--	--		--	--		--	--		--	--		--	--
79.5037	68.6239		0	0		--	--		--	--		--	--		--	--		--	--		--	--		--	--		--	--		--	--		--	--
86.9825	71.2061		0	0		--	--		--	--		--	--		--	--		--	--		--	--		--	--		--	--		--	--		--	--
94.4613	73.4801		0	0		--	--		--	--		--	--		--	--		--	--		--	--		--	--		--	--		--	--		--	--
77.4432	75.6928		0	0		--	--		--	--		--	--		--	--		--	--		--	--		--	--		--	--		--	--		--	--
81.3152	78.0854		0	0		--	--		--	--		--	--		--	--		--	--		--	--		--	--		--	--		--	--		--	--
79.4538	80.4777		0	0		--	--		--	--		--	--		--	--		--	--		--	--		--	--		--	--		--	--		--	--
91.8102	82.9468		0	0		--	--		--	--		--	--		--	--		--	--		--	--		--	--		--	--		--	--		--	--
87.4322	85.3405		0	0		--	--		--	--		--	--		--	--		--	--		--	--		--	--		--	--		--	--		--	--
94.3877	86.6496		0	0		--	--		--	--		--	--		--	--		--	--		--	--		--	--		--	--		--	--		--	--
101.156	87.8807		0	0		--	--		--	--		--	--		--	--		--	--		--	--		--	--		--	--		--	--		--	--
90.2652	89.1176		0	0		--	--		--	--		--	--		--	--		--	--		--	--		--	--		--	--		--	--		--	--
96.7305	90.6928		0	0		--	--		--	--		--	--		--	--		--	--		--	--		--	--		--	--		--	--		--	--
101.528	91.9006		0	0		--	--		--	--		--	--		--	--		--	--		--	--		--	--		--	--		--	--		--	--
94.4215	93.8528		0	0		--	--		--	--		--	--		--	--		--	--		--	--		--	--		--	--		--	--		--	--
80.9025	95.5708		0	0		--	--		--	--		--	--		--	--		--	--		--	--		--	--		--	--		--	--		--	--
85.4269	97.6055		0	0		--	--		--	--		--	--		--	--		--	--		--	--		--	--		--	--		--	--		--	--
80.7783	99.1666		0	0		--	--		--	--		--	--		--	--		--	--		--	--		--	--		--	--		--	--		--	--
84.195	100.611		0	0		--	--		--	--		--	--		--	--		--	--		--	--		--	--		--	--		--	--		--	--
85.3284	102.328		0	0		--	--		--	--		--	--		--	--		--	--		--	--		--	--		--	--		--	--		--	--
89.9339	103.573		0	0		--	--		--	--		--	--		--	--		--	--		--	--		--	--		--	--		--	--		--	--
82.2146	105.784		0	0		--	--		--	--		--	--		--	--		--	--		--	--		--	--		--	--		--	--		--	--
84.1232	107.747		0	0		--	--		--	--		--	--		--	--		--	--		--	--		--	--		--	--		--	--		--	--
85.8698	109.587		0	0		--	--		--	--		--	--		--	--		--	--		--	--		--	--		--	--		--	--		--	--
107.58	134.844		4.10872	4.15884		--	--		--	--		--	--		--	--		--	--		--	--		--	--		--	--		--	--		--	--
127.308	153.912		4.44735	4.35524		--	--		--	--		--	--		--	--		--	--		--	--		--	--		--	--		--	--		--	--
147.035	173.596		4.78599	4.54897		--	--		--	--		--	--		--	--		--	--		--	--		--	--		--	--		--	--		--	--
157.222	175.359		5.03208	4.59811		--	--		--	--		--	--		--	--		--	--		--	--		--	--		--	--		--	--		--	--
157.87	161.831		5.18561	4.50975		--	--		--	--		--	--		--	--		--	--		--	--		--	--		--	--		--	--		--	--
158.517	153.081		5.33914	4.43202		--	--		--	--		--	--		--	--		--	--		--	--		--	--		--	--		--	--		--	--
177.824	180.216		4.59045	5.14859		--	--		--	--		--	--		--	--		--	--		--	--		--	--		--	--		--	--		--	--
206.972	207.326		4.86796	5.84688		--	--		--	--		--	--		--	--		--	--		--	--		--	--		--	--		--	--		--	--
234.306	235.938		3.91646	6.21793		--	--		--	--		--	--		--	--		--	--		--	--		--	--		--	--		--	--		--	--
243.869	267.662		3.54205	6.3023		--	--		--	--		--	--		--	--		--	--		--	--		--	--		--	--		--	--		--	--
282.486	300.303		3.14021	6.3689		--	--		--	--		--	--		--	--		--	--		--	--		--	--		--	--		--	--		--	--
306.957	323.782		2.74696	6.45412		--	--		--	--		--	--		--	--		--	--		--	--		--	--		--	--		--	--		--	--
351.876	345.365		2.858	6.53773		--	--		--	--		--	--		--	--		--	--		--	--		--	--		--	--		--	--		--	--
371.411	367.267		2.76439	6.80608		--	--		--	--		--	--		--	--		--	--		--	--		--	--		--	--		--	--		--	--
421.284	385.92		2.75411	7.2463		--	--		--	--		--	--		--	--		--	--		--	--		--	--		--	--		--	--		--	--
407.446	397.566		2.74893	7.69084		--	--		--	--		--	--		--	--		--	--		--	--		--	--		--	--		--	--		--	--
415.371	421.832		4.08077	7.58095		--	--		--	--		--	--		--	--		--	--		--	--		--	--		--	--		--	--		--	--
465.244	455.335		3.64532	7.47787		--	--		--	--		--	--		--	--		--	--		--	--		--	--		--	--		--	--		--	--
482.557	476.132		3.52857	7.82196		--	--		--	--		--	--		--	--		--	--		--	--		--	--		--	--		--	--		--	--
507.373	501.12		4.65331	8.61098		--	--		--	--		--	--		--	--		--	--		--	--		--	--		--	--		--	--		--	--
538.777	526.317		4.73371	9.40338		--	--		--	--		--	--		--	--		--	--		--	--		--	--		--	--		--	--		--	--
633.746	572.588		6.51151	9.42482		--	--		--	--		--	--		--	--		--	--		--	--		--	--		--	--		--	--		--	--
721.827	633.181		6.99504	9.45723		--	--		--	--		--	--		--	--		--	--		--	--		--	--		--	--		--	--		--	--
757.765	676.462		8.00676	9.54125		--	--		--	--		--	--		--	--		--	--		--	--		--	--		--	--		--	--		--	--
854.437	741.109		8.72984	9.67924		--	--		--	--		--	--		--	--		--	--		--	--		--	--		--	--		--	--		--	--
921.483	785.961		10.9468	9.82889		--	--		--	--		--	--		--	--		--	--		--	--		--	--		--	--		--	--		--	--
198.298	231.115		0	0		--	--		--	--		--	--		--	--		--	--		--	--		--	--		--	--		--	--		--	--
217.567	249.467		0	0		--	--		--	--		--	--		--	--		--	--		--	--		--	--		--	--		--	--		--	--
236.836	267.932		0	0		--	--		--	--		--	--		--	--		--	--		--	--		--	--		--	--		--	--		--	--
246.999	280.616		0	0		--	--		--	--		--	--		--	--		--	--		--	--		--	--		--	--		--	--		--	--
248.057	288.072		0	0		--	--		--	--		--	--		--	--		--	--		--	--		--	--		--	--		--	--		--	--
249.114	296.535		0	0		--	--		--	--		--	--		--	--		--	--		--	--		--	--		--	--		--	--		--	--
272.369	308.116		0	0		--	--		--	--		--	--		--	--		--	--		--	--		--	--		--	--		--	--		--	--
288.282	320.398		0	0		--	--		--	--		--	--		--	--		--	--		--	--		--	--		--	--		--	--		--	--
290.634	328.643		0.00495	0.00413		--	--		--	--		--	--		--	--		--	--		--	--		--	--		--	--		--	--		--	--
305.922	333.96		0.0053	0.01239		--	--		--	--		--	--		--	--		--	--		--	--		--	--		--	--		--	--		--	--
319.901	340.448		0.00437	0.02067		--	--		--	--		--	--		--	--		--	--		--	--		--	--		--	--		--	--		--	--
333.269	389.063		0.00553	0.02073		--	--		--	--		--	--		--	--		--	--		--	--		--	--		--	--		--	--		--	--
336.348	422.001		0.00564	0.02075		--	--		--	--		--	--		--	--		--	--		--	--		--	--		--	--		--	--		--	--
548.361	430.944		0.00711	0.02078		--	--		--	--		--	--		--	--		--	--		--	--		--	--		--	--		--	--		--	--
503.219	428.507		0.00773	0.02081		--	--		--	--		--	--		--	--		--	--		--	--		--	--		--	--		--	--		--	--
424.283	426.783		0.00713	0.02081		--	--		--	--		--	--		--	--		--	--		--	--		--	--		--	--		--	--		--	--
489.621	430.052		0.00735	0.0209		--	--		--	--		--	--		--	--		--	--		--	--		--	--		--	--		--	--		--	--
502.954	439.513		0.00753	0.021		--	--		--	--		--	--		--	--		--	--		--	--		--	--		--	--		--	--		--	--
489.361	461.347		0.00686	0.02106		--	--		--	--		--	--		--	--		--	--		--	--		--	--		--	--		--	--		--	--
544.421	484.999		0.00647	0.02109		--	--		--	--		--	--		--	--		--	--		--	--		--	--		--	--		--	--		--	--
569.447	499.901		0.00689	0.02112		--	--		--	--		--	--		--	--		--	--		--	--		--	--		--	--		--	--		--	--
614.333	514.418		0.00693	0.02111		--	--		--	--		--	--		--	--		--	--		--	--		--	--		--	--		--	--		--	--
664.566	547.956		0.00763	0.02111		--	--		--	--		--	--		--	--		--	--		--	--		--	--		--	--		--	--		--	--
697.121	581.613		0.00679	0.02113		--	--		--	--		--	--		--	--		--	--		--	--		--	--		--	--		--	--		--	--
716.089	610.648		0.00662	0.02118		--	--		--	--		--	--		--	--		--	--		--	--		--	--		--	--		--	--		--	--
730.446	623.671		0.00661	0.0212		--	--		--	--		--	--		--	--		--	--		--	--		--	--		--	--		--	--		--	--
40.5059	35.8767		5.29015	6.09536		--	--		--	--		--	--		--	--		--	--		--	--		--	--		--	--		--	--		--	--
51.063	42.4272		6.52968	6.84851		--	--		--	--		--	--		--	--		--	--		--	--		--	--		--	--		--	--		--	--
61.62	48.1255		7.7692	7.46761		--	--		--	--		--	--		--	--		--	--		--	--		--	--		--	--		--	--		--	--
74.5574	50.8466		8.38315	7.70105		--	--		--	--		--	--		--	--		--	--		--	--		--	--		--	--		--	--		--	--
89.8753	49.4386		8.37153	7.64614		--	--		--	--		--	--		--	--		--	--		--	--		--	--		--	--		--	--		--	--
105.193	47.258		8.3599	7.61046		--	--		--	--		--	--		--	--		--	--		--	--		--	--		--	--		--	--		--	--
109.664	51.2347		9.67206	8.26332		--	--		--	--		--	--		--	--		--	--		--	--		--	--		--	--		--	--		--	--
110.192	55.1518		8.99922	8.91861		--	--		--	--		--	--		--	--		--	--		--	--		--	--		--	--		--	--		--	--
109.179	57.5717		8.83165	9.30667		--	--		--	--		--	--		--	--		--	--		--	--		--	--		--	--		--	--		--	--
116.176	58.1216		9.70767	9.3977		--	--		--	--		--	--		--	--		--	--		--	--		--	--		--	--		--	--		--	--
111.966	58.8061		9.48494	9.47891		--	--		--	--		--	--		--	--		--	--		--	--		--	--		--	--		--	--		--	--
115.507	62.5588		9.47542	9.71493		--	--		--	--		--	--		--	--		--	--		--	--		--	--		--	--		--	--		--	--
129.273	66.5839		9.77944	9.95047		--	--		--	--		--	--		--	--		--	--		--	--		--	--		--	--		--	--		--	--
139.596	71.4284		9.75211	10.145		--	--		--	--		--	--		--	--		--	--		--	--		--	--		--	--		--	--		--	--
142.54	76.4671		9.93475	10.2426		--	--		--	--		--	--		--	--		--	--		--	--		--	--		--	--		--	--		--	--
165.085	80.9724		9.19487	10.2839		--	--		--	--		--	--		--	--		--	--		--	--		--	--		--	--		--	--		--	--
165.793	84.8294		9.25015	10.0607		--	--		--	--		--	--		--	--		--	--		--	--		--	--		--	--		--	--		--	--
148.742	88.5738		8.16564	9.59367		--	--		--	--		--	--		--	--		--	--		--	--		--	--		--	--		--	--		--	--
162.984	90.7287		7.58949	9.0306		--	--		--	--		--	--		--	--		--	--		--	--		--	--		--	--		--	--		--	--
170.237	91.15		6.50623	9.07093		--	--		--	--		--	--		--	--		--	--		--	--		--	--		--	--		--	--		--	--
176.765	91.7856		7.91033	8.67971		--	--		--	--		--	--		--	--		--	--		--	--		--	--		--	--		--	--		--	--
191.925	91.3195		9.49428	8.73871		--	--		--	--		--	--		--	--		--	--		--	--		--	--		--	--		--	--		--	--
214.607	91.6456		10.3988	8.78804		--	--		--	--		--	--		--	--		--	--		--	--		--	--		--	--		--	--		--	--
223.191	94.0894		10.6255	9.64705		--	--		--	--		--	--		--	--		--	--		--	--		--	--		--	--		--	--		--	--
241.318	98.7385		9.14888	9.97898		--	--		--	--		--	--		--	--		--	--		--	--		--	--		--	--		--	--		--	--
247.424	104.379		12.8691	10.3196		--	--		--	--		--	--		--	--		--	--		--	--		--	--		--	--		--	--		--	--
130.857	133.128		141.438	160.802		--	--		--	--		--	--		--	--		--	--		--	--		--	--		--	--		--	--		--	--
135.502	136.835		149.453	170.36		--	--		--	--		--	--		--	--		--	--		--	--		--	--		--	--		--	--		--	--
140.146	140.629		157.469	180.423		--	--		--	--		--	--		--	--		--	--		--	--		--	--		--	--		--	--		--	--
142.766	144.242		163.554	190.425		--	--		--	--		--	--		--	--		--	--		--	--		--	--		--	--		--	--		--	--
143.36	146.049		167.71	200.389		--	--		--	--		--	--		--	--		--	--		--	--		--	--		--	--		--	--		--	--
143.955	146.971		171.866	210.78		--	--		--	--		--	--		--	--		--	--		--	--		--	--		--	--		--	--		--	--
135.93	159.897		188.11	217.123		--	--		--	--		--	--		--	--		--	--		--	--		--	--		--	--		--	--		--	--
147.861	172.764		201.822	224.338		--	--		--	--		--	--		--	--		--	--		--	--		--	--		--	--		--	--		--	--
143.537	178.535		203.448	227.886		--	--		--	--		--	--		--	--		--	--		--	--		--	--		--	--		--	--		--	--
140.023	177.636		217.978	228.189		--	--		--	--		--	--		--	--		--	--		--	--		--	--		--	--		--	--		--	--
145.825	176.807		214.952	229.433		--	--		--	--		--	--		--	--		--	--		--	--		--	--		--	--		--	--		--	--
149.291	181.907		241.679	270.49		--	--		--	--		--	--		--	--		--	--		--	--		--	--		--	--		--	--		--	--
161.059	186.893		237.972	297.595		--	--		--	--		--	--		--	--		--	--		--	--		--	--		--	--		--	--		--	--
184.312	193.846		417.168	301.421		--	--		--	--		--	--		--	--		--	--		--	--		--	--		--	--		--	--		--	--
203.312	202.583		355.044	294.149		--	--		--	--		--	--		--	--		--	--		--	--		--	--		--	--		--	--		--	--
220.995	211.423		269.221	288.429		--	--		--	--		--	--		--	--		--	--		--	--		--	--		--	--		--	--		--	--
242.006	223.547		337.126	287.072		--	--		--	--		--	--		--	--		--	--		--	--		--	--		--	--		--	--		--	--
258.698	235.386		333.244	292.322		--	--		--	--		--	--		--	--		--	--		--	--		--	--		--	--		--	--		--	--
270.079	244.732		314.112	309.354		--	--		--	--		--	--		--	--		--	--		--	--		--	--		--	--		--	--		--	--
284.007	251.802		367.516	327.558		--	--		--	--		--	--		--	--		--	--		--	--		--	--		--	--		--	--		--	--
291.596	258.874		378.375	339.952		--	--		--	--		--	--		--	--		--	--		--	--		--	--		--	--		--	--		--	--
306.065	271.985		401.121	344.902		--	--		--	--		--	--		--	--		--	--		--	--		--	--		--	--		--	--		--	--
336.128	283.911		427.761	367.164		--	--		--	--		--	--		--	--		--	--		--	--		--	--		--	--		--	--		--	--
362.804	300.306		457.092	390.569		--	--		--	--		--	--		--	--		--	--		--	--		--	--		--	--		--	--		--	--
388.17	321.256		464.947	410.469		--	--		--	--		--	--		--	--		--	--		--	--		--	--		--	--		--	--		--	--
417.667	341.599		483.502	415.371		--	--		--	--		--	--		--	--		--	--		--	--		--	--		--	--		--	--		--	--
57.9553	68.5075		40.4085	53.1903		--	--		--	--		--	--		--	--		--	--		--	--		--	--		--	--		--	--		--	--
61.7786	71.7941		49.7106	61.8069		--	--		--	--		--	--		--	--		--	--		--	--		--	--		--	--		--	--		--	--
65.6019	75.0949		59.0127	70.9035		--	--		--	--		--	--		--	--		--	--		--	--		--	--		--	--		--	--		--	--
68.9894	76.5635		63.9383	77.3437		--	--		--	--		--	--		--	--		--	--		--	--		--	--		--	--		--	--		--	--
71.9409	76.0326		64.4874	80.6702		--	--		--	--		--	--		--	--		--	--		--	--		--	--		--	--		--	--		--	--
74.8925	75.4493		65.0364	84.6035		--	--		--	--		--	--		--	--		--	--		--	--		--	--		--	--		--	--		--	--
76.5328	80.3767		67.4855	92.6566		--	--		--	--		--	--		--	--		--	--		--	--		--	--		--	--		--	--		--	--
79.5486	85.216		78.7458	100.12		--	--		--	--		--	--		--	--		--	--		--	--		--	--		--	--		--	--		--	--
82.3331	88.3076		74.8021	102.588		--	--		--	--		--	--		--	--		--	--		--	--		--	--		--	--		--	--		--	--
82.3693	89.6193		90.0824	102.575		--	--		--	--		--	--		--	--		--	--		--	--		--	--		--	--		--	--		--	--
81.4261	90.7498		91.6414	102.916		--	--		--	--		--	--		--	--		--	--		--	--		--	--		--	--		--	--		--	--
89.3355	94.7271		97.4503	111.438		--	--		--	--		--	--		--	--		--	--		--	--		--	--		--	--		--	--		--	--
87.8662	98.7242		121.026	120.076		--	--		--	--		--	--		--	--		--	--		--	--		--	--		--	--		--	--		--	--
91.3189	101.458		107.713	124.87		--	--		--	--		--	--		--	--		--	--		--	--		--	--		--	--		--	--		--	--
97.1323	103.043		106.995	126.788		--	--		--	--		--	--		--	--		--	--		--	--		--	--		--	--		--	--		--	--
97.851	104.735		103.554	127.824		--	--		--	--		--	--		--	--		--	--		--	--		--	--		--	--		--	--		--	--
103.251	108.121		112.458	128.254		--	--		--	--		--	--		--	--		--	--		--	--		--	--		--	--		--	--		--	--
102.335	111.533		124.299	127.619		--	--		--	--		--	--		--	--		--	--		--	--		--	--		--	--		--	--		--	--
114.28	114.677		157.884	132.753		--	--		--	--		--	--		--	--		--	--		--	--		--	--		--	--		--	--		--	--
116.696	117.394		168.703	144.094		--	--		--	--		--	--		--	--		--	--		--	--		--	--		--	--		--	--		--	--
119.969	120.232		178.667	154.944		--	--		--	--		--	--		--	--		--	--		--	--		--	--		--	--		--	--		--	--
133.029	130.229		156.742	151.938		--	--		--	--		--	--		--	--		--	--		--	--		--	--		--	--		--	--		--	--
144.549	139.914		178.427	148.771		--	--		--	--		--	--		--	--		--	--		--	--		--	--		--	--		--	--		--	--
154.057	150.064		151.85	147.535		--	--		--	--		--	--		--	--		--	--		--	--		--	--		--	--		--	--		--	--
160.813	161.317		152.814	147.879		--	--		--	--		--	--		--	--		--	--		--	--		--	--		--	--		--	--		--	--
171.171	173.406		158.418	147.34		--	--		--	--		--	--		--	--		--	--		--	--		--	--		--	--		--	--		--	--
31.6811	33.8428		17.5144	17.7935		--	--		--	--		--	--		--	--		--	--		--	--		--	--		--	--		--	--		--	--
35.6029	36.3575		19.0489	18.5347		--	--		--	--		--	--		--	--		--	--		--	--		--	--		--	--		--	--		--	--
39.5246	38.8521		20.5835	19.0618		--	--		--	--		--	--		--	--		--	--		--	--		--	--		--	--		--	--		--	--
41.695	39.8603		22.0659	19.2572		--	--		--	--		--	--		--	--		--	--		--	--		--	--		--	--		--	--		--	--
42.114	39.5913		23.4961	19.0467		--	--		--	--		--	--		--	--		--	--		--	--		--	--		--	--		--	--		--	--
42.5329	39.5976		24.9263	18.5936		--	--		--	--		--	--		--	--		--	--		--	--		--	--		--	--		--	--		--	--
49.7684	43.8509		24.7107	18.035		--	--		--	--		--	--		--	--		--	--		--	--		--	--		--	--		--	--		--	--
50.6427	47.9997		26.8452	17.4185		--	--		--	--		--	--		--	--		--	--		--	--		--	--		--	--		--	--		--	--
55.8673	51.3773		29.1409	16.9179		--	--		--	--		--	--		--	--		--	--		--	--		--	--		--	--		--	--		--	--
59.5245	54.0534		28.3562	16.8398		--	--		--	--		--	--		--	--		--	--		--	--		--	--		--	--		--	--		--	--
65.5481	56.8051		29.0754	16.793		--	--		--	--		--	--		--	--		--	--		--	--		--	--		--	--		--	--		--	--
61.2723	59.9787		31.6163	16.311		--	--		--	--		--	--		--	--		--	--		--	--		--	--		--	--		--	--		--	--
53.5737	61.6487		29.9443	15.9281		--	--		--	--		--	--		--	--		--	--		--	--		--	--		--	--		--	--		--	--
58.7774	61.3303		29.1034	15.2174		--	--		--	--		--	--		--	--		--	--		--	--		--	--		--	--		--	--		--	--
65.2015	59.2432		30.0605	14.2667		--	--		--	--		--	--		--	--		--	--		--	--		--	--		--	--		--	--		--	--
62.2277	57.5363		28.7891	13.3403		--	--		--	--		--	--		--	--		--	--		--	--		--	--		--	--		--	--		--	--
52.8263	59.0559		25.0746	12.2432		--	--		--	--		--	--		--	--		--	--		--	--		--	--		--	--		--	--		--	--
57.0876	60.8699		26.2782	10.9987		--	--		--	--		--	--		--	--		--	--		--	--		--	--		--	--		--	--		--	--
59.2189	62.2597		22.8385	10.0615		--	--		--	--		--	--		--	--		--	--		--	--		--	--		--	--		--	--		--	--
61.1213	63.2983		25.0621	9.52876		--	--		--	--		--	--		--	--		--	--		--	--		--	--		--	--		--	--		--	--
62.222	64.3115		22.7134	8.85563		--	--		--	--		--	--		--	--		--	--		--	--		--	--		--	--		--	--		--	--
62.1233	64.3387		22.9519	8.98267		--	--		--	--		--	--		--	--		--	--		--	--		--	--		--	--		--	--		--	--
63.8799	64.2148		25.0044	8.91825		--	--		--	--		--	--		--	--		--	--		--	--		--	--		--	--		--	--		--	--
64.8867	63.4282		24.8923	8.32351		--	--		--	--		--	--		--	--		--	--		--	--		--	--		--	--		--	--		--	--
63.6173	62.5712		25.9736	7.21107		--	--		--	--		--	--		--	--		--	--		--	--		--	--		--	--		--	--		--	--
64.5637	61.7578		26.3709	6.11881		--	--		--	--		--	--		--	--		--	--		--	--		--	--		--	--		--	--		--	--
490.943	682.423		0	0		--	--		--	--		--	--		--	--		--	--		--	--		--	--		--	--		--	--		--	--
572.49	766.971		0	0		--	--		--	--		--	--		--	--		--	--		--	--		--	--		--	--		--	--		--	--
654.036	839.969		0	0		--	--		--	--		--	--		--	--		--	--		--	--		--	--		--	--		--	--		--	--
704.348	876.596		0.00657	0.00258		--	--		--	--		--	--		--	--		--	--		--	--		--	--		--	--		--	--		--	--
723.425	884.736		0.01972	0.01259		--	--		--	--		--	--		--	--		--	--		--	--		--	--		--	--		--	--		--	--
742.502	892.633		0.03287	0.0279		--	--		--	--		--	--		--	--		--	--		--	--		--	--		--	--		--	--		--	--
800.913	923.356		0.03936	0.03278		--	--		--	--		--	--		--	--		--	--		--	--		--	--		--	--		--	--		--	--
822.785	949.565		0.03798	0.03681		--	--		--	--		--	--		--	--		--	--		--	--		--	--		--	--		--	--		--	--
794.002	983.129		0.04925	0.03916		--	--		--	--		--	--		--	--		--	--		--	--		--	--		--	--		--	--		--	--
936.875	1033.79		0.03825	0.04058		--	--		--	--		--	--		--	--		--	--		--	--		--	--		--	--		--	--		--	--
989.944	1079.74		0.03982	0.04019		--	--		--	--		--	--		--	--		--	--		--	--		--	--		--	--		--	--		--	--
1031.69	1149.67		0.04999	0.04055		--	--		--	--		--	--		--	--		--	--		--	--		--	--		--	--		--	--		--	--
1116.01	1210.6		0.0499	0.0408		--	--		--	--		--	--		--	--		--	--		--	--		--	--		--	--		--	--		--	--
1231.52	1235.66		0.03733	0.04035		--	--		--	--		--	--		--	--		--	--		--	--		--	--		--	--		--	--		--	--
1233.82	1235.58		0.04508	0.04185		--	--		--	--		--	--		--	--		--	--		--	--		--	--		--	--		--	--		--	--
1242.28	1228.9		0.05454	0.04287		--	--		--	--		--	--		--	--		--	--		--	--		--	--		--	--		--	--		--	--
1235.86	1203.87		0.03738	0.0474		--	--		--	--		--	--		--	--		--	--		--	--		--	--		--	--		--	--		--	--
1189.41	1178.04		0.04695	0.05284		--	--		--	--		--	--		--	--		--	--		--	--		--	--		--	--		--	--		--	--
1235.22	1170.69		0.0426	0.05955		--	--		--	--		--	--		--	--		--	--		--	--		--	--		--	--		--	--		--	--
1304.1	1172.69		0.04267	0.06312		--	--		--	--		--	--		--	--		--	--		--	--		--	--		--	--		--	--		--	--
1329.94	1165.4		0.0511	0.06369		--	--		--	--		--	--		--	--		--	--		--	--		--	--		--	--		--	--		--	--
1296.24	1150.46		0.04798	0.05965		--	--		--	--		--	--		--	--		--	--		--	--		--	--		--	--		--	--		--	--
1330.28	1137.77		0.05113	0.05481		--	--		--	--		--	--		--	--		--	--		--	--		--	--		--	--		--	--		--	--
1364.11	1120.09		0.053	0.05257		--	--		--	--		--	--		--	--		--	--		--	--		--	--		--	--		--	--		--	--
1359.16	1099.18		0.05268	0.05306		--	--		--	--		--	--		--	--		--	--		--	--		--	--		--	--		--	--		--	--
1395.46	1076.41		0.05521	0.05345		--	--		--	--		--	--		--	--		--	--		--	--		--	--		--	--		--	--		--	--
257.367	279.535		0	0		--	--		--	--		--	--		--	--		--	--		--	--		--	--		--	--		--	--		--	--
291.829	301.081		0	0		--	--		--	--		--	--		--	--		--	--		--	--		--	--		--	--		--	--		--	--
326.29	322.459		0	0		--	--		--	--		--	--		--	--		--	--		--	--		--	--		--	--		--	--		--	--
344.645	338.469		0	0		--	--		--	--		--	--		--	--		--	--		--	--		--	--		--	--		--	--		--	--
346.893	349.003		0	0		--	--		--	--		--	--		--	--		--	--		--	--		--	--		--	--		--	--		--	--
349.141	360.817		0	0		--	--		--	--		--	--		--	--		--	--		--	--		--	--		--	--		--	--		--	--
391.852	386.149		0	0		--	--		--	--		--	--		--	--		--	--		--	--		--	--		--	--		--	--		--	--
403.74	415.427		0	0		--	--		--	--		--	--		--	--		--	--		--	--		--	--		--	--		--	--		--	--
418.325	437.4		0	0		--	--		--	--		--	--		--	--		--	--		--	--		--	--		--	--		--	--		--	--
427.573	451.748		0	0		--	--		--	--		--	--		--	--		--	--		--	--		--	--		--	--		--	--		--	--
410.06	461.838		0	0		--	--		--	--		--	--		--	--		--	--		--	--		--	--		--	--		--	--		--	--
442.284	488.507		0	0		--	--		--	--		--	--		--	--		--	--		--	--		--	--		--	--		--	--		--	--
461.662	513.774		0	0		--	--		--	--		--	--		--	--		--	--		--	--		--	--		--	--		--	--		--	--
504.047	522.573		0	0		--	--		--	--		--	--		--	--		--	--		--	--		--	--		--	--		--	--		--	--
510.989	519.061		0	0		--	--		--	--		--	--		--	--		--	--		--	--		--	--		--	--		--	--		--	--
469.148	506.983		0	0		--	--		--	--		--	--		--	--		--	--		--	--		--	--		--	--		--	--		--	--
419.702	474.191		0	0		--	--		--	--		--	--		--	--		--	--		--	--		--	--		--	--		--	--		--	--
420.908	447.924		0	0		--	--		--	--		--	--		--	--		--	--		--	--		--	--		--	--		--	--		--	--
466.648	433.915		0	0		--	--		--	--		--	--		--	--		--	--		--	--		--	--		--	--		--	--		--	--
453.126	419.844		0	0		--	--		--	--		--	--		--	--		--	--		--	--		--	--		--	--		--	--		--	--
424.162	407.066		0	0		--	--		--	--		--	--		--	--		--	--		--	--		--	--		--	--		--	--		--	--
411.121	398.874		0	0		--	--		--	--		--	--		--	--		--	--		--	--		--	--		--	--		--	--		--	--
441.56	396.917		0	0		--	--		--	--		--	--		--	--		--	--		--	--		--	--		--	--		--	--		--	--
476.788	399.897		0	0		--	--		--	--		--	--		--	--		--	--		--	--		--	--		--	--		--	--		--	--
466.38	406.181		0	0		--	--		--	--		--	--		--	--		--	--		--	--		--	--		--	--		--	--		--	--
483.845	406.216		0	0		--	--		--	--		--	--		--	--		--	--		--	--		--	--		--	--		--	--		--	--
56.6746	76.5814		49.674	58.1202		--	--		--	--		--	--		--	--		--	--		--	--		--	--		--	--		--	--		--	--
65.5716	84.726		54.6545	61.2523		--	--		--	--		--	--		--	--		--	--		--	--		--	--		--	--		--	--		--	--
74.4685	92.666		59.635	64.3526		--	--		--	--		--	--		--	--		--	--		--	--		--	--		--	--		--	--		--	--
79.2929	96.7684		61.185	65.7911		--	--		--	--		--	--		--	--		--	--		--	--		--	--		--	--		--	--		--	--
80.0447	97.3614		59.3045	65.7767		--	--		--	--		--	--		--	--		--	--		--	--		--	--		--	--		--	--		--	--
80.7966	98.1428		57.4241	65.9302		--	--		--	--		--	--		--	--		--	--		--	--		--	--		--	--		--	--		--	--
85.2551	104.224		54.279	69.1247		--	--		--	--		--	--		--	--		--	--		--	--		--	--		--	--		--	--		--	--
85.1036	110.432		56.3791	72.2276		--	--		--	--		--	--		--	--		--	--		--	--		--	--		--	--		--	--		--	--
106.487	117.974		60.4346	73.9771		--	--		--	--		--	--		--	--		--	--		--	--		--	--		--	--		--	--		--	--
111.436	126.266		66.0379	74.5002		--	--		--	--		--	--		--	--		--	--		--	--		--	--		--	--		--	--		--	--
114.018	133.702		68.1188	74.7865		--	--		--	--		--	--		--	--		--	--		--	--		--	--		--	--		--	--		--	--
119.731	139.258		72.0936	76.4444		--	--		--	--		--	--		--	--		--	--		--	--		--	--		--	--		--	--		--	--
123.119	144.292		74.0979	78.4929		--	--		--	--		--	--		--	--		--	--		--	--		--	--		--	--		--	--		--	--
139.362	147.249		77.0805	79.9735		--	--		--	--		--	--		--	--		--	--		--	--		--	--		--	--		--	--		--	--
142.559	150.239		76.7608	81.6482		--	--		--	--		--	--		--	--		--	--		--	--		--	--		--	--		--	--		--	--
144.44	153.823		82.3959	83.8262		--	--		--	--		--	--		--	--		--	--		--	--		--	--		--	--		--	--		--	--
153.069	154.565		87.7362	84.5453		--	--		--	--		--	--		--	--		--	--		--	--		--	--		--	--		--	--		--	--
147.033	154.876		84.8105	84.4831		--	--		--	--		--	--		--	--		--	--		--	--		--	--		--	--		--	--		--	--
151.164	155.259		87.7902	87.2026		--	--		--	--		--	--		--	--		--	--		--	--		--	--		--	--		--	--		--	--
160.003	157.074		94.8939	92.3802		--	--		--	--		--	--		--	--		--	--		--	--		--	--		--	--		--	--		--	--
156.493	158.628		108.419	98.5619		--	--		--	--		--	--		--	--		--	--		--	--		--	--		--	--		--	--		--	--
158.49	162.38		111.697	99.7173		--	--		--	--		--	--		--	--		--	--		--	--		--	--		--	--		--	--		--	--
171.36	167.083		111.787	100.491		--	--		--	--		--	--		--	--		--	--		--	--		--	--		--	--		--	--		--	--
180.07	171.867		120.164	105.052		--	--		--	--		--	--		--	--		--	--		--	--		--	--		--	--		--	--		--	--
186.326	174.198		129.618	109.392		--	--		--	--		--	--		--	--		--	--		--	--		--	--		--	--		--	--		--	--
191.056	178.904		143.923	114.427		--	--		--	--		--	--		--	--		--	--		--	--		--	--		--	--		--	--		--	--
146.766	159.877		0.84003	1.24052		--	--		--	--		--	--		--	--		--	--		--	--		--	--		--	--		--	--		--	--
164.787	170.933		1.02178	1.43268		--	--		--	--		--	--		--	--		--	--		--	--		--	--		--	--		--	--		--	--
182.808	182.001		1.20353	1.60408		--	--		--	--		--	--		--	--		--	--		--	--		--	--		--	--		--	--		--	--
192.133	188.86		1.30759	1.69311		--	--		--	--		--	--		--	--		--	--		--	--		--	--		--	--		--	--		--	--
192.763	192.08		1.33397	1.7138		--	--		--	--		--	--		--	--		--	--		--	--		--	--		--	--		--	--		--	--
193.393	195.745		1.36035	1.73469		--	--		--	--		--	--		--	--		--	--		--	--		--	--		--	--		--	--		--	--
202.156	198.493		1.4733	1.82023		--	--		--	--		--	--		--	--		--	--		--	--		--	--		--	--		--	--		--	--
201.319	201.891		1.47261	1.90681		--	--		--	--		--	--		--	--		--	--		--	--		--	--		--	--		--	--		--	--
204.332	207.914		1.52657	1.95164		--	--		--	--		--	--		--	--		--	--		--	--		--	--		--	--		--	--		--	--
216.437	213.549		1.62325	1.95124		--	--		--	--		--	--		--	--		--	--		--	--		--	--		--	--		--	--		--	--
188.192	218.136		1.41459	1.95029		--	--		--	--		--	--		--	--		--	--		--	--		--	--		--	--		--	--		--	--
191.864	225.285		1.44589	1.94273		--	--		--	--		--	--		--	--		--	--		--	--		--	--		--	--		--	--		--	--
203.278	232.614		1.57885	1.93552		--	--		--	--		--	--		--	--		--	--		--	--		--	--		--	--		--	--		--	--
212.533	241.952		1.63078	1.93484		--	--		--	--		--	--		--	--		--	--		--	--		--	--		--	--		--	--		--	--
219.302	250.312		1.52866	1.93623		--	--		--	--		--	--		--	--		--	--		--	--		--	--		--	--		--	--		--	--
214.959	255.327		1.49707	1.93231		--	--		--	--		--	--		--	--		--	--		--	--		--	--		--	--		--	--		--	--
290.833	255.556		3.54477	2.60646		--	--		--	--		--	--		--	--		--	--		--	--		--	--		--	--		--	--		--	--
285.938	244.768		3.60594	2.94437		--	--		--	--		--	--		--	--		--	--		--	--		--	--		--	--		--	--		--	--
232.639	231.597		4.02213	2.96408		--	--		--	--		--	--		--	--		--	--		--	--		--	--		--	--		--	--		--	--
198.793	219.041		4.58285	2.81461		--	--		--	--		--	--		--	--		--	--		--	--		--	--		--	--		--	--		--	--
196.452	209.181		3.38665	2.68278		--	--		--	--		--	--		--	--		--	--		--	--		--	--		--	--		--	--		--	--
198.051	201.764		3.77669	2.74226		--	--		--	--		--	--		--	--		--	--		--	--		--	--		--	--		--	--		--	--
211.91	197.484		4.17069	2.81181		--	--		--	--		--	--		--	--		--	--		--	--		--	--		--	--		--	--		--	--
241.535	195.385		3.50037	2.90569		--	--		--	--		--	--		--	--		--	--		--	--		--	--		--	--		--	--		--	--
225.969	194.812		3.3924	3.01924		--	--		--	--		--	--		--	--		--	--		--	--		--	--		--	--		--	--		--	--
227.757	193.586		5.09495	3.11948		--	--		--	--		--	--		--	--		--	--		--	--		--	--		--	--		--	--		--	--
78.9106	90.3746		0	0		--	--		--	--		--	--		--	--		--	--		--	--		--	--		--	--		--	--		--	--
92.293	99.0831		0	0		--	--		--	--		--	--		--	--		--	--		--	--		--	--		--	--		--	--		--	--
105.676	107.239		0	0		--	--		--	--		--	--		--	--		--	--		--	--		--	--		--	--		--	--		--	--
112.628	115.24		0.15993	0.03546		--	--		--	--		--	--		--	--		--	--		--	--		--	--		--	--		--	--		--	--
113.15	123.9		0.47979	0.1702		--	--		--	--		--	--		--	--		--	--		--	--		--	--		--	--		--	--		--	--
113.673	133.78		0.79965	0.34818		--	--		--	--		--	--		--	--		--	--		--	--		--	--		--	--		--	--		--	--
122.783	135.822		0.58648	0.36073		--	--		--	--		--	--		--	--		--	--		--	--		--	--		--	--		--	--		--	--
119.995	136.711		0.49593	0.36112		--	--		--	--		--	--		--	--		--	--		--	--		--	--		--	--		--	--		--	--
120.608	139.5		0.46183	0.38632		--	--		--	--		--	--		--	--		--	--		--	--		--	--		--	--		--	--		--	--
134.159	143.317		0.44814	0.41476		--	--		--	--		--	--		--	--		--	--		--	--		--	--		--	--		--	--		--	--
118.703	146.503		0.6257	0.43489		--	--		--	--		--	--		--	--		--	--		--	--		--	--		--	--		--	--		--	--
116.359	149.828		0.43138	0.45072		--	--		--	--		--	--		--	--		--	--		--	--		--	--		--	--		--	--		--	--
115.899	153.16		0.45188	0.47505		--	--		--	--		--	--		--	--		--	--		--	--		--	--		--	--		--	--		--	--
125.188	158.695		0.48574	0.48156		--	--		--	--		--	--		--	--		--	--		--	--		--	--		--	--		--	--		--	--
126.83	164.897		0.39648	0.45974		--	--		--	--		--	--		--	--		--	--		--	--		--	--		--	--		--	--		--	--
127.867	169.279		0.34903	0.44115		--	--		--	--		--	--		--	--		--	--		--	--		--	--		--	--		--	--		--	--
130.731	157.997		0.29436	0.4257		--	--		--	--		--	--		--	--		--	--		--	--		--	--		--	--		--	--		--	--
93.8349	136.777		0.26514	0.41528		--	--		--	--		--	--		--	--		--	--		--	--		--	--		--	--		--	--		--	--
73.0812	123.857		0.30082	0.41201		--	--		--	--		--	--		--	--		--	--		--	--		--	--		--	--		--	--		--	--
77.0425	118.422		0.25093	0.41316		--	--		--	--		--	--		--	--		--	--		--	--		--	--		--	--		--	--		--	--
89.582	111.385		0.2961	0.4147		--	--		--	--		--	--		--	--		--	--		--	--		--	--		--	--		--	--		--	--
102.64	113.044		0.22987	0.39916		--	--		--	--		--	--		--	--		--	--		--	--		--	--		--	--		--	--		--	--
103.738	112.324		0.21179	0.39183		--	--		--	--		--	--		--	--		--	--		--	--		--	--		--	--		--	--		--	--
110.498	114.384		0.19582	0.39848		--	--		--	--		--	--		--	--		--	--		--	--		--	--		--	--		--	--		--	--
116.725	118.748		0.16596	0.40804		--	--		--	--		--	--		--	--		--	--		--	--		--	--		--	--		--	--		--	--
124.111	122.32		0.13977	0.43062		--	--		--	--		--	--		--	--		--	--		--	--		--	--		--	--		--	--		--	--
252.613	320.752		7.66083	12.3099		--	--		--	--		--	--		--	--		--	--		--	--		--	--		--	--		--	--		--	--
299.032	357.826		8.55753	13.2731		--	--		--	--		--	--		--	--		--	--		--	--		--	--		--	--		--	--		--	--
345.452	391.347		9.45424	13.9854		--	--		--	--		--	--		--	--		--	--		--	--		--	--		--	--		--	--		--	--
369.167	407.776		9.73861	13.8949		--	--		--	--		--	--		--	--		--	--		--	--		--	--		--	--		--	--		--	--
370.176	409.95		9.41066	13.1631		--	--		--	--		--	--		--	--		--	--		--	--		--	--		--	--		--	--		--	--
371.185	412.745		9.0827	12.4333		--	--		--	--		--	--		--	--		--	--		--	--		--	--		--	--		--	--		--	--
392.65	421.094		10.1896	12.5752		--	--		--	--		--	--		--	--		--	--		--	--		--	--		--	--		--	--		--	--
387.447	429.582		10.588	12.8776		--	--		--	--		--	--		--	--		--	--		--	--		--	--		--	--		--	--		--	--
390.188	437.717		9.75695	13.275		--	--		--	--		--	--		--	--		--	--		--	--		--	--		--	--		--	--		--	--
420.61	442.741		10.5209	13.6671		--	--		--	--		--	--		--	--		--	--		--	--		--	--		--	--		--	--		--	--
363.35	446.847		9.98424	14.0216		--	--		--	--		--	--		--	--		--	--		--	--		--	--		--	--		--	--		--	--
371.724	456.801		11.8416	14.7871		--	--		--	--		--	--		--	--		--	--		--	--		--	--		--	--		--	--		--	--
388.998	467.1		11.7908	15.5341		--	--		--	--		--	--		--	--		--	--		--	--		--	--		--	--		--	--		--	--
414.905	481.987		12.5315	15.8192		--	--		--	--		--	--		--	--		--	--		--	--		--	--		--	--		--	--		--	--
418.972	497.659		12.1414	15.5001		--	--		--	--		--	--		--	--		--	--		--	--		--	--		--	--		--	--		--	--
422.563	508.861		12.0844	15.0145		--	--		--	--		--	--		--	--		--	--		--	--		--	--		--	--		--	--		--	--
531.659	494.75		12.3211	14.8841		--	--		--	--		--	--		--	--		--	--		--	--		--	--		--	--		--	--		--	--
426.284	469.255		11.8618	14.7483		--	--		--	--		--	--		--	--		--	--		--	--		--	--		--	--		--	--		--	--
388.629	447.585		12.9296	16.6842		--	--		--	--		--	--		--	--		--	--		--	--		--	--		--	--		--	--		--	--
335.741	431.575		12.7047	19.1417		--	--		--	--		--	--		--	--		--	--		--	--		--	--		--	--		--	--		--	--
347.39	418.671		26.6804	20.3021		--	--		--	--		--	--		--	--		--	--		--	--		--	--		--	--		--	--		--	--
368.133	411.27		26.4962	19.419		--	--		--	--		--	--		--	--		--	--		--	--		--	--		--	--		--	--		--	--
362.856	405.324		26.5689	20.215		--	--		--	--		--	--		--	--		--	--		--	--		--	--		--	--		--	--		--	--
382.94	403.753		27.0805	20.0545		--	--		--	--		--	--		--	--		--	--		--	--		--	--		--	--		--	--		--	--
382.231	405.362		26.9882	18.9395		--	--		--	--		--	--		--	--		--	--		--	--		--	--		--	--		--	--		--	--
389.649	407.047		29.745	17.2423		--	--		--	--		--	--		--	--		--	--		--	--		--	--		--	--		--	--		--	--
44.6274	56.0162		0.25933	0.10502		--	--		--	--		--	--		--	--		--	--		--	--		--	--		--	--		--	--		--	--
48.1699	59.4342		0.29027	0.10943		--	--		--	--		--	--		--	--		--	--		--	--		--	--		--	--		--	--		--	--
51.7124	62.6498		0.32121	0.11364		--	--		--	--		--	--		--	--		--	--		--	--		--	--		--	--		--	--		--	--
54.1024	65.2065		0.33735	0.18849		--	--		--	--		--	--		--	--		--	--		--	--		--	--		--	--		--	--		--	--
55.3398	67.3931		0.3387	0.33711		--	--		--	--		--	--		--	--		--	--		--	--		--	--		--	--		--	--		--	--
56.5773	69.804		0.34005	0.48069		--	--		--	--		--	--		--	--		--	--		--	--		--	--		--	--		--	--		--	--
61.8682	76.6196		0.35656	0.52148		--	--		--	--		--	--		--	--		--	--		--	--		--	--		--	--		--	--		--	--
67.0343	83.4952		0.39312	0.56161		--	--		--	--		--	--		--	--		--	--		--	--		--	--		--	--		--	--		--	--
73.2349	87.2574		0.41084	0.58316		--	--		--	--		--	--		--	--		--	--		--	--		--	--		--	--		--	--		--	--
72.0879	87.6317		0.42776	0.58764		--	--		--	--		--	--		--	--		--	--		--	--		--	--		--	--		--	--		--	--
79.7539	88.0499		0.44306	0.59291		--	--		--	--		--	--		--	--		--	--		--	--		--	--		--	--		--	--		--	--
93.0553	99.2057		0.47924	0.6007		--	--		--	--		--	--		--	--		--	--		--	--		--	--		--	--		--	--		--	--
100.94	110.919		0.52855	0.61223		--	--		--	--		--	--		--	--		--	--		--	--		--	--		--	--		--	--		--	--
114.624	121.432		0.43146	0.62463		--	--		--	--		--	--		--	--		--	--		--	--		--	--		--	--		--	--		--	--
114.384	130.489		0.28952	0.63725		--	--		--	--		--	--		--	--		--	--		--	--		--	--		--	--		--	--		--	--
127.894	139.517		0.34478	0.64725		--	--		--	--		--	--		--	--		--	--		--	--		--	--		--	--		--	--		--	--
149.742	147.962		0.34723	0.61076		--	--		--	--		--	--		--	--		--	--		--	--		--	--		--	--		--	--		--	--
161.636	154.725		0.39815	0.57514		--	--		--	--		--	--		--	--		--	--		--	--		--	--		--	--		--	--		--	--
153.762	155.976		0.47072	0.55314		--	--		--	--		--	--		--	--		--	--		--	--		--	--		--	--		--	--		--	--
149.278	152.968		0.50654	0.53603		--	--		--	--		--	--		--	--		--	--		--	--		--	--		--	--		--	--		--	--
141.041	150.328		0.29643	0.51782		--	--		--	--		--	--		--	--		--	--		--	--		--	--		--	--		--	--		--	--
172.02	158.393		0.28323	0.49292		--	--		--	--		--	--		--	--		--	--		--	--		--	--		--	--		--	--		--	--
189.096	166.958		0.44253	0.47616		--	--		--	--		--	--		--	--		--	--		--	--		--	--		--	--		--	--		--	--
207.286	177.56		0.56079	0.63493		--	--		--	--		--	--		--	--		--	--		--	--		--	--		--	--		--	--		--	--
234.901	187.637		0.49398	0.9593		--	--		--	--		--	--		--	--		--	--		--	--		--	--		--	--		--	--		--	--
239.751	196.449		0.43279	1.28235		--	--		--	--		--	--		--	--		--	--		--	--		--	--		--	--		--	--		--	--
466.889	548.205		2.37487	4.16971		--	--		--	--		--	--		--	--		--	--		--	--		--	--		--	--		--	--		--	--
511.8	577.752		2.79802	4.80151		--	--		--	--		--	--		--	--		--	--		--	--		--	--		--	--		--	--		--	--
556.711	606.177		3.22118	5.44975		--	--		--	--		--	--		--	--		--	--		--	--		--	--		--	--		--	--		--	--
577.859	619.158		3.45189	5.82048		--	--		--	--		--	--		--	--		--	--		--	--		--	--		--	--		--	--		--	--
575.245	618.806		3.49017	5.91936		--	--		--	--		--	--		--	--		--	--		--	--		--	--		--	--		--	--		--	--
572.631	619.687		3.52845	6.06352		--	--		--	--		--	--		--	--		--	--		--	--		--	--		--	--		--	--		--	--
574.398	633.19		4.36136	6.85772		--	--		--	--		--	--		--	--		--	--		--	--		--	--		--	--		--	--		--	--
610.244	646.217		4.81552	7.62682		--	--		--	--		--	--		--	--		--	--		--	--		--	--		--	--		--	--		--	--
637.955	660.928		5.10886	8.18196		--	--		--	--		--	--		--	--		--	--		--	--		--	--		--	--		--	--		--	--
685.623	679.889		4.94236	8.54126		--	--		--	--		--	--		--	--		--	--		--	--		--	--		--	--		--	--		--	--
665.76	699.247		5.80874	8.8699		--	--		--	--		--	--		--	--		--	--		--	--		--	--		--	--		--	--		--	--
743.835	730.157		5.41933	9.18003		--	--		--	--		--	--		--	--		--	--		--	--		--	--		--	--		--	--		--	--
797.767	761.675		5.49219	9.43941		--	--		--	--		--	--		--	--		--	--		--	--		--	--		--	--		--	--		--	--
752.836	798.566		6.07825	9.51552		--	--		--	--		--	--		--	--		--	--		--	--		--	--		--	--		--	--		--	--
836.482	834.848		5.66561	9.47794		--	--		--	--		--	--		--	--		--	--		--	--		--	--		--	--		--	--		--	--
929.986	875.281		6.576	9.47776		--	--		--	--		--	--		--	--		--	--		--	--		--	--		--	--		--	--		--	--
971.002	906.432		7.527	11.4913		--	--		--	--		--	--		--	--		--	--		--	--		--	--		--	--		--	--		--	--
1005.49	931.474		9.97922	13.2806		--	--		--	--		--	--		--	--		--	--		--	--		--	--		--	--		--	--		--	--
1070.06	953.694		11.4636	14.7682		--	--		--	--		--	--		--	--		--	--		--	--		--	--		--	--		--	--		--	--
1105.97	982.13		12.6661	14.6875		--	--		--	--		--	--		--	--		--	--		--	--		--	--		--	--		--	--		--	--
1125.7	1011.57		14.1361	12.6949		--	--		--	--		--	--		--	--		--	--		--	--		--	--		--	--		--	--		--	--
1093.85	1021.82		16.2255	13.3037		--	--		--	--		--	--		--	--		--	--		--	--		--	--		--	--		--	--		--	--
1126.98	1032.51		17.9459	13.7081		--	--		--	--		--	--		--	--		--	--		--	--		--	--		--	--		--	--		--	--
1219.69	1074.63		19.6833	14.0623		--	--		--	--		--	--		--	--		--	--		--	--		--	--		--	--		--	--		--	--
1317.76	1139.16		18.7313	14.5337		--	--		--	--		--	--		--	--		--	--		--	--		--	--		--	--		--	--		--	--
1376.48	1217.24		19.2869	15.1398		--	--		--	--		--	--		--	--		--	--		--	--		--	--		--	--		--	--		--	--
34.2908	31.9722		3.24782	3.28969		--	--		--	--		--	--		--	--		--	--		--	--		--	--		--	--		--	--		--	--
37.9997	33.7369		3.74283	3.64376		--	--		--	--		--	--		--	--		--	--		--	--		--	--		--	--		--	--		--	--
41.7086	35.5949		4.23784	3.96469		--	--		--	--		--	--		--	--		--	--		--	--		--	--		--	--		--	--		--	--
43.7081	36.8333		4.51896	4.16019		--	--		--	--		--	--		--	--		--	--		--	--		--	--		--	--		--	--		--	--
43.9982	37.5578		4.58618	3.71326		--	--		--	--		--	--		--	--		--	--		--	--		--	--		--	--		--	--		--	--
44.2882	38.5045		4.6534	3.22099		--	--		--	--		--	--		--	--		--	--		--	--		--	--		--	--		--	--		--	--
45.169	41.4161		4.88258	3.24969		--	--		--	--		--	--		--	--		--	--		--	--		--	--		--	--		--	--		--	--
48.5071	44.8852		5.57267	3.25818		--	--		--	--		--	--		--	--		--	--		--	--		--	--		--	--		--	--		--	--
54.1623	47.3976		5.52544	3.2665		--	--		--	--		--	--		--	--		--	--		--	--		--	--		--	--		--	--		--	--
58.238	50.0942		4.92697	3.14639		--	--		--	--		--	--		--	--		--	--		--	--		--	--		--	--		--	--		--	--
54.0446	52.0276		5.51566	3.00097		--	--		--	--		--	--		--	--		--	--		--	--		--	--		--	--		--	--		--	--
54.1342	52.097		6.03015	2.89953		--	--		--	--		--	--		--	--		--	--		--	--		--	--		--	--		--	--		--	--
62.4375	53.2262		6.17406	2.79677		--	--		--	--		--	--		--	--		--	--		--	--		--	--		--	--		--	--		--	--
60.5774	54.8185		6.21604	2.72592		--	--		--	--		--	--		--	--		--	--		--	--		--	--		--	--		--	--		--	--
60.32	56.3987		5.45419	2.69719		--	--		--	--		--	--		--	--		--	--		--	--		--	--		--	--		--	--		--	--
59.6621	58.224		5.42539	2.66954		--	--		--	--		--	--		--	--		--	--		--	--		--	--		--	--		--	--		--	--
59.9932	59.1219		5.10798	2.29031		--	--		--	--		--	--		--	--		--	--		--	--		--	--		--	--		--	--		--	--
51.6372	59.0364		3.57279	1.97404		--	--		--	--		--	--		--	--		--	--		--	--		--	--		--	--		--	--		--	--
43.0086	57.9138		4.17332	5.27437		--	--		--	--		--	--		--	--		--	--		--	--		--	--		--	--		--	--		--	--
43.8552	56.931		5.60127	5.44575		--	--		--	--		--	--		--	--		--	--		--	--		--	--		--	--		--	--		--	--
44.7662	56.4382		4.69952	5.59959		--	--		--	--		--	--		--	--		--	--		--	--		--	--		--	--		--	--		--	--
44.495	56.5471		5.53692	6.04039		--	--		--	--		--	--		--	--		--	--		--	--		--	--		--	--		--	--		--	--
45.6294	57.3699		5.60707	5.84762		--	--		--	--		--	--		--	--		--	--		--	--		--	--		--	--		--	--		--	--
45.8539	59.4013		7.10202	5.45892		--	--		--	--		--	--		--	--		--	--		--	--		--	--		--	--		--	--		--	--
45.8865	60.7612		5.94446	5.47828		--	--		--	--		--	--		--	--		--	--		--	--		--	--		--	--		--	--		--	--
45.5282	61.2077		5.03514	5.70278		--	--		--	--		--	--		--	--		--	--		--	--		--	--		--	--		--	--		--	--
470.725	552.06		0.26239	0.35938		--	--		--	--		--	--		--	--		--	--		--	--		--	--		--	--		--	--		--	--
577.395	627.008		0.21412	0.36009		--	--		--	--		--	--		--	--		--	--		--	--		--	--		--	--		--	--		--	--
684.065	694.822		0.16585	0.36056		--	--		--	--		--	--		--	--		--	--		--	--		--	--		--	--		--	--		--	--
733.318	728.904		0.13463	0.35271		--	--		--	--		--	--		--	--		--	--		--	--		--	--		--	--		--	--		--	--
725.154	733.144		0.12045	0.33787		--	--		--	--		--	--		--	--		--	--		--	--		--	--		--	--		--	--		--	--
716.99	736.427		0.10627	0.3254		--	--		--	--		--	--		--	--		--	--		--	--		--	--		--	--		--	--		--	--
779.095	793.374		0.27805	0.33549		--	--		--	--		--	--		--	--		--	--		--	--		--	--		--	--		--	--		--	--
848.741	854.627		0.37073	0.34509		--	--		--	--		--	--		--	--		--	--		--	--		--	--		--	--		--	--		--	--
873.12	902.576		0.42777	0.35168		--	--		--	--		--	--		--	--		--	--		--	--		--	--		--	--		--	--		--	--
962.803	942.399		0.19803	0.35468		--	--		--	--		--	--		--	--		--	--		--	--		--	--		--	--		--	--		--	--
1012.93	996.95		0.2367	0.356		--	--		--	--		--	--		--	--		--	--		--	--		--	--		--	--		--	--		--	--
1160.07	1098.71		0.15176	0.3567		--	--		--	--		--	--		--	--		--	--		--	--		--	--		--	--		--	--		--	--
1300.1	1208.11		0.11818	0.35626		--	--		--	--		--	--		--	--		--	--		--	--		--	--		--	--		--	--		--	--
1326.85	1270.76		0.15091	0.3557		--	--		--	--		--	--		--	--		--	--		--	--		--	--		--	--		--	--		--	--
1367.2	1354.95		0.38119	0.35615		--	--		--	--		--	--		--	--		--	--		--	--		--	--		--	--		--	--		--	--
1462.47	1442.55		0.26005	0.35758		--	--		--	--		--	--		--	--		--	--		--	--		--	--		--	--		--	--		--	--
1539.58	1553.81		0.1765	0.3604		--	--		--	--		--	--		--	--		--	--		--	--		--	--		--	--		--	--		--	--
1611.35	1637.22		0.26859	0.36245		--	--		--	--		--	--		--	--		--	--		--	--		--	--		--	--		--	--		--	--
1739.92	1753.93		0.33286	0.36458		--	--		--	--		--	--		--	--		--	--		--	--		--	--		--	--		--	--		--	--
1810.71	1865.39		0.15035	0.36544		--	--		--	--		--	--		--	--		--	--		--	--		--	--		--	--		--	--		--	--
1775.06	1947.7		0.19646	0.36696		--	--		--	--		--	--		--	--		--	--		--	--		--	--		--	--		--	--		--	--
1744.2	1991.06		0.23748	0.46913		--	--		--	--		--	--		--	--		--	--		--	--		--	--		--	--		--	--		--	--
1835.03	2001.86		0.21664	0.5718		--	--		--	--		--	--		--	--		--	--		--	--		--	--		--	--		--	--		--	--
1979.22	2058.63		0.23352	0.57951		--	--		--	--		--	--		--	--		--	--		--	--		--	--		--	--		--	--		--	--
2112.97	2157.07		0.20716	0.49109		--	--		--	--		--	--		--	--		--	--		--	--		--	--		--	--		--	--		--	--
2233.08	2260.67		0.20817	0.40218		--	--		--	--		--	--		--	--		--	--		--	--		--	--		--	--		--	--		--	--
130.39	165.655		107.58	134.844		--	--		--	--		--	--		--	--		--	--		--	--		--	--		--	--		--	--		--	--
145.732	178.638		127.308	153.912		--	--		--	--		--	--		--	--		--	--		--	--		--	--		--	--		--	--		--	--
161.075	191.362		147.035	173.596		--	--		--	--		--	--		--	--		--	--		--	--		--	--		--	--		--	--		--	--
170.271	200.469		157.222	175.359		--	--		--	--		--	--		--	--		--	--		--	--		--	--		--	--		--	--		--	--
173.32	206.099		157.87	161.831		--	--		--	--		--	--		--	--		--	--		--	--		--	--		--	--		--	--		--	--
176.369	211.712		158.517	153.081		--	--		--	--		--	--		--	--		--	--		--	--		--	--		--	--		--	--		--	--
181.589	226.987		177.824	180.216		--	--		--	--		--	--		--	--		--	--		--	--		--	--		--	--		--	--		--	--
209.14	241.407		206.972	207.326		--	--		--	--		--	--		--	--		--	--		--	--		--	--		--	--		--	--		--	--
224.553	254.713		234.306	235.938		--	--		--	--		--	--		--	--		--	--		--	--		--	--		--	--		--	--		--	--
241.463	268.994		243.869	267.662		--	--		--	--		--	--		--	--		--	--		--	--		--	--		--	--		--	--		--	--
271.843	281.99		282.486	300.303		--	--		--	--		--	--		--	--		--	--		--	--		--	--		--	--		--	--		--	--
314.821	297.262		306.957	323.782		--	--		--	--		--	--		--	--		--	--		--	--		--	--		--	--		--	--		--	--
342.559	312.528		351.876	345.365		--	--		--	--		--	--		--	--		--	--		--	--		--	--		--	--		--	--		--	--
344.293	325.027		371.411	367.267		--	--		--	--		--	--		--	--		--	--		--	--		--	--		--	--		--	--		--	--
370.255	335.492		421.284	385.92		--	--		--	--		--	--		--	--		--	--		--	--		--	--		--	--		--	--		--	--
393.069	346.925		407.446	397.566		--	--		--	--		--	--		--	--		--	--		--	--		--	--		--	--		--	--		--	--
423.669	362.774		415.371	421.832		--	--		--	--		--	--		--	--		--	--		--	--		--	--		--	--		--	--		--	--
462.474	380.102		465.244	455.335		--	--		--	--		--	--		--	--		--	--		--	--		--	--		--	--		--	--		--	--
512.914	401.815		482.557	476.132		--	--		--	--		--	--		--	--		--	--		--	--		--	--		--	--		--	--		--	--
530.324	422.027		507.373	501.12		--	--		--	--		--	--		--	--		--	--		--	--		--	--		--	--		--	--		--	--
596.526	439.31		538.777	526.317		--	--		--	--		--	--		--	--		--	--		--	--		--	--		--	--		--	--		--	--
640.612	457.05		633.746	572.588		--	--		--	--		--	--		--	--		--	--		--	--		--	--		--	--		--	--		--	--
716.844	473.823		721.827	633.181		--	--		--	--		--	--		--	--		--	--		--	--		--	--		--	--		--	--		--	--
757.951	486.928		757.765	676.462		--	--		--	--		--	--		--	--		--	--		--	--		--	--		--	--		--	--		--	--
804.305	500.783		854.437	741.109		--	--		--	--		--	--		--	--		--	--		--	--		--	--		--	--		--	--		--	--
829.475	518.477		921.483	785.961		--	--		--	--		--	--		--	--		--	--		--	--		--	--		--	--		--	--		--	--
64.6145	94.1037		0.19874	0.24885		--	--		--	--		--	--		--	--		--	--		--	--		--	--		--	--		--	--		--	--
72.9838	102.274		0.21623	0.26176		--	--		--	--		--	--		--	--		--	--		--	--		--	--		--	--		--	--		--	--
81.353	109.671		0.23373	0.27538		--	--		--	--		--	--		--	--		--	--		--	--		--	--		--	--		--	--		--	--
85.6154	112.755		0.29018	0.31323		--	--		--	--		--	--		--	--		--	--		--	--		--	--		--	--		--	--		--	--
85.771	112.201		0.3856	0.36579		--	--		--	--		--	--		--	--		--	--		--	--		--	--		--	--		--	--		--	--
85.9266	111.751		0.48101	0.40975		--	--		--	--		--	--		--	--		--	--		--	--		--	--		--	--		--	--		--	--
92.9611	118.033		0.47801	0.51626		--	--		--	--		--	--		--	--		--	--		--	--		--	--		--	--		--	--		--	--
102.175	124.498		0.52992	0.63309		--	--		--	--		--	--		--	--		--	--		--	--		--	--		--	--		--	--		--	--
102.559	133.462		0.40654	0.69261		--	--		--	--		--	--		--	--		--	--		--	--		--	--		--	--		--	--		--	--
116.26	141.407		0.65693	0.68681		--	--		--	--		--	--		--	--		--	--		--	--		--	--		--	--		--	--		--	--
132.715	148.25		0.63963	0.68538		--	--		--	--		--	--		--	--		--	--		--	--		--	--		--	--		--	--		--	--
149.167	163.907		0.70315	0.68134		--	--		--	--		--	--		--	--		--	--		--	--		--	--		--	--		--	--		--	--
170.99	179.333		0.66779	0.67928		--	--		--	--		--	--		--	--		--	--		--	--		--	--		--	--		--	--		--	--
186.79	198.178		0.57296	0.68293		--	--		--	--		--	--		--	--		--	--		--	--		--	--		--	--		--	--		--	--
207.352	219.557		0.58706	0.69081		--	--		--	--		--	--		--	--		--	--		--	--		--	--		--	--		--	--		--	--
221.104	239.967		0.74106	0.70117		--	--		--	--		--	--		--	--		--	--		--	--		--	--		--	--		--	--		--	--
242.59	251.138		0.788	0.72701		--	--		--	--		--	--		--	--		--	--		--	--		--	--		--	--		--	--		--	--
265.222	260.834		0.84772	0.74566		--	--		--	--		--	--		--	--		--	--		--	--		--	--		--	--		--	--		--	--
287.986	270.716		0.95728	0.75425		--	--		--	--		--	--		--	--		--	--		--	--		--	--		--	--		--	--		--	--
301.953	282.51		0.90169	0.77149		--	--		--	--		--	--		--	--		--	--		--	--		--	--		--	--		--	--		--	--
324.846	293.963		0.89325	0.78554		--	--		--	--		--	--		--	--		--	--		--	--		--	--		--	--		--	--		--	--
360.875	320.689		0.90896	0.7904		--	--		--	--		--	--		--	--		--	--		--	--		--	--		--	--		--	--		--	--
426.695	352.223		0.98379	0.80997		--	--		--	--		--	--		--	--		--	--		--	--		--	--		--	--		--	--		--	--
477.197	368.056		0.92041	0.81131		--	--		--	--		--	--		--	--		--	--		--	--		--	--		--	--		--	--		--	--
499.207	378.082		0.81714	0.80812		--	--		--	--		--	--		--	--		--	--		--	--		--	--		--	--		--	--		--	--
529.331	392.749		0.90057	0.81496		--	--		--	--		--	--		--	--		--	--		--	--		--	--		--	--		--	--		--	--
81.7701	68.7177		0.09473	0.08982		--	--		--	--		--	--		--	--		--	--		--	--		--	--		--	--		--	--		--	--
79.1602	68.9639		0.11519	0.09794		--	--		--	--		--	--		--	--		--	--		--	--		--	--		--	--		--	--		--	--
76.5503	69.551		0.13565	0.1045		--	--		--	--		--	--		--	--		--	--		--	--		--	--		--	--		--	--		--	--
78.5845	70.8344		0.1167	0.08577		--	--		--	--		--	--		--	--		--	--		--	--		--	--		--	--		--	--		--	--
85.2628	72.4765		0.05835	0.04278		--	--		--	--		--	--		--	--		--	--		--	--		--	--		--	--		--	--		--	--
91.9411	74.298		0	0		--	--		--	--		--	--		--	--		--	--		--	--		--	--		--	--		--	--		--	--
96.6979	78.2118		0.14978	0.000648076		--	--		--	--		--	--		--	--		--	--		--	--		--	--		--	--		--	--		--	--
101.036	82.1158		0.13781	0.0014		--	--		--	--		--	--		--	--		--	--		--	--		--	--		--	--		--	--		--	--
96.4453	83.5622		0.19013	0.00222		--	--		--	--		--	--		--	--		--	--		--	--		--	--		--	--		--	--		--	--
103.279	84.8352		0.26291	0.00312		--	--		--	--		--	--		--	--		--	--		--	--		--	--		--	--		--	--		--	--
97.1139	85.4964		0.47214	0.00404		--	--		--	--		--	--		--	--		--	--		--	--		--	--		--	--		--	--		--	--
99.7152	86.2509		0.66504	0.10793		--	--		--	--		--	--		--	--		--	--		--	--		--	--		--	--		--	--		--	--
103.399	87.8148		0.47822	0.2084		--	--		--	--		--	--		--	--		--	--		--	--		--	--		--	--		--	--		--	--
80.2159	88.5441		0.4082	0.26142		--	--		--	--		--	--		--	--		--	--		--	--		--	--		--	--		--	--		--	--
76.632	88.7004		0.37241	0.26986		--	--		--	--		--	--		--	--		--	--		--	--		--	--		--	--		--	--		--	--
75.1993	88.4551		0.42842	0.27944		--	--		--	--		--	--		--	--		--	--		--	--		--	--		--	--		--	--		--	--
69.6718	87.3978		0.53893	0.22224		--	--		--	--		--	--		--	--		--	--		--	--		--	--		--	--		--	--		--	--
69.0458	86.5952		0.74487	0.16636		--	--		--	--		--	--		--	--		--	--		--	--		--	--		--	--		--	--		--	--
67.8516	85.2747		0.53458	0.14915		--	--		--	--		--	--		--	--		--	--		--	--		--	--		--	--		--	--		--	--
64.1533	83.9527		0.60905	0.16502		--	--		--	--		--	--		--	--		--	--		--	--		--	--		--	--		--	--		--	--
63.353	82.8649		0.64291	0.17595		--	--		--	--		--	--		--	--		--	--		--	--		--	--		--	--		--	--		--	--
60.7421	81.3738		0.88832	0.18973		--	--		--	--		--	--		--	--		--	--		--	--		--	--		--	--		--	--		--	--
60.9635	81.3444		0.74006	0.20331		--	--		--	--		--	--		--	--		--	--		--	--		--	--		--	--		--	--		--	--
60.2098	81.3883		1.07784	0.22999		--	--		--	--		--	--		--	--		--	--		--	--		--	--		--	--		--	--		--	--
75.6823	81.0921		0.92097	0.26916		--	--		--	--		--	--		--	--		--	--		--	--		--	--		--	--		--	--		--	--
76.3247	79.77		0.85775	0.30749		--	--		--	--		--	--		--	--		--	--		--	--		--	--		--	--		--	--		--	--
43.3857	56.9583		0	0		--	--		--	--		--	--		--	--		--	--		--	--		--	--		--	--		--	--		--	--
53.6482	66.354		0	0		--	--		--	--		--	--		--	--		--	--		--	--		--	--		--	--		--	--		--	--
63.9107	76.1097		0	0		--	--		--	--		--	--		--	--		--	--		--	--		--	--		--	--		--	--		--	--
69.3299	82.7538		0	0		--	--		--	--		--	--		--	--		--	--		--	--		--	--		--	--		--	--		--	--
69.9059	85.9835		0	0		--	--		--	--		--	--		--	--		--	--		--	--		--	--		--	--		--	--		--	--
70.4818	89.9199		0	0		--	--		--	--		--	--		--	--		--	--		--	--		--	--		--	--		--	--		--	--
74.7889	98.4023		0	0		--	--		--	--		--	--		--	--		--	--		--	--		--	--		--	--		--	--		--	--
83.7746	106.242		0	0		--	--		--	--		--	--		--	--		--	--		--	--		--	--		--	--		--	--		--	--
81.2207	109.437		0	0		--	--		--	--		--	--		--	--		--	--		--	--		--	--		--	--		--	--		--	--
98.5941	110.569		0	0		--	--		--	--		--	--		--	--		--	--		--	--		--	--		--	--		--	--		--	--
103.142	112.043		0	0		--	--		--	--		--	--		--	--		--	--		--	--		--	--		--	--		--	--		--	--
111.393	121.122		0	0		--	--		--	--		--	--		--	--		--	--		--	--		--	--		--	--		--	--		--	--
131.65	130.334		0	0		--	--		--	--		--	--		--	--		--	--		--	--		--	--		--	--		--	--		--	--
119.093	135.363		0	0		--	--		--	--		--	--		--	--		--	--		--	--		--	--		--	--		--	--		--	--
116.692	137.174		0	0		--	--		--	--		--	--		--	--		--	--		--	--		--	--		--	--		--	--		--	--
113.291	137.907		0	0		--	--		--	--		--	--		--	--		--	--		--	--		--	--		--	--		--	--		--	--
121.312	138.513		0	0		--	--		--	--		--	--		--	--		--	--		--	--		--	--		--	--		--	--		--	--
137.898	137.778		0	0		--	--		--	--		--	--		--	--		--	--		--	--		--	--		--	--		--	--		--	--
167.023	143.164		0	0		--	--		--	--		--	--		--	--		--	--		--	--		--	--		--	--		--	--		--	--
177.864	155.21		0	0		--	--		--	--		--	--		--	--		--	--		--	--		--	--		--	--		--	--		--	--
188.548	166.756		0	0		--	--		--	--		--	--		--	--		--	--		--	--		--	--		--	--		--	--		--	--
171.028	164.6		0	0		--	--		--	--		--	--		--	--		--	--		--	--		--	--		--	--		--	--		--	--
189.321	162.121		0	0		--	--		--	--		--	--		--	--		--	--		--	--		--	--		--	--		--	--		--	--
165.199	162.099		0	0		--	--		--	--		--	--		--	--		--	--		--	--		--	--		--	--		--	--		--	--
163.036	163.299		0	0		--	--		--	--		--	--		--	--		--	--		--	--		--	--		--	--		--	--		--	--
168.235	163.19		0	0		--	--		--	--		--	--		--	--		--	--		--	--		--	--		--	--		--	--		--	--
94.7022	111.939		0	0		--	--		--	--		--	--		--	--		--	--		--	--		--	--		--	--		--	--		--	--
106.088	120.37		0	0		--	--		--	--		--	--		--	--		--	--		--	--		--	--		--	--		--	--		--	--
117.474	128.663		0	0		--	--		--	--		--	--		--	--		--	--		--	--		--	--		--	--		--	--		--	--
124.647	134.423		0	0		--	--		--	--		--	--		--	--		--	--		--	--		--	--		--	--		--	--		--	--
127.608	137.385		0	0		--	--		--	--		--	--		--	--		--	--		--	--		--	--		--	--		--	--		--	--
130.569	139.945		0	0		--	--		--	--		--	--		--	--		--	--		--	--		--	--		--	--		--	--		--	--
126.461	150.429		0	0		--	--		--	--		--	--		--	--		--	--		--	--		--	--		--	--		--	--		--	--
137.63	160.842		0	0		--	--		--	--		--	--		--	--		--	--		--	--		--	--		--	--		--	--		--	--
142.828	168.089		0	0		--	--		--	--		--	--		--	--		--	--		--	--		--	--		--	--		--	--		--	--
153.433	172.437		0	0		--	--		--	--		--	--		--	--		--	--		--	--		--	--		--	--		--	--		--	--
165.624	176.616		0	0		--	--		--	--		--	--		--	--		--	--		--	--		--	--		--	--		--	--		--	--
178.621	181.825		0	0		--	--		--	--		--	--		--	--		--	--		--	--		--	--		--	--		--	--		--	--
185.706	187.448		0	0		--	--		--	--		--	--		--	--		--	--		--	--		--	--		--	--		--	--		--	--
187.071	194.604		0	0		--	--		--	--		--	--		--	--		--	--		--	--		--	--		--	--		--	--		--	--
197.882	203.135		0	0		--	--		--	--		--	--		--	--		--	--		--	--		--	--		--	--		--	--		--	--
212.316	211.535		0	0		--	--		--	--		--	--		--	--		--	--		--	--		--	--		--	--		--	--		--	--
218.369	217.689		0	0		--	--		--	--		--	--		--	--		--	--		--	--		--	--		--	--		--	--		--	--
225.384	222.744		0	0		--	--		--	--		--	--		--	--		--	--		--	--		--	--		--	--		--	--		--	--
237.478	231.177		0	0		--	--		--	--		--	--		--	--		--	--		--	--		--	--		--	--		--	--		--	--
255.814	243.139		0	0		--	--		--	--		--	--		--	--		--	--		--	--		--	--		--	--		--	--		--	--
274.534	256.913		0	0		--	--		--	--		--	--		--	--		--	--		--	--		--	--		--	--		--	--		--	--
274.902	261.811		0	0		--	--		--	--		--	--		--	--		--	--		--	--		--	--		--	--		--	--		--	--
301.958	266.279		0	0		--	--		--	--		--	--		--	--		--	--		--	--		--	--		--	--		--	--		--	--
311.819	277.098		0	0		--	--		--	--		--	--		--	--		--	--		--	--		--	--		--	--		--	--		--	--
341.568	286.109		0	0		--	--		--	--		--	--		--	--		--	--		--	--		--	--		--	--		--	--		--	--
349.267	296.544		0	0		--	--		--	--		--	--		--	--		--	--		--	--		--	--		--	--		--	--		--	--
29.218	37.3021		22.4925	23.4448		--	--		--	--		--	--		--	--		--	--		--	--		--	--		--	--		--	--		--	--
31.914	40.0076		25.8781	25.5343		--	--		--	--		--	--		--	--		--	--		--	--		--	--		--	--		--	--		--	--
34.6099	42.7747		29.2638	27.7667		--	--		--	--		--	--		--	--		--	--		--	--		--	--		--	--		--	--		--	--
36.3159	43.576		32.0316	29.6724		--	--		--	--		--	--		--	--		--	--		--	--		--	--		--	--		--	--		--	--
37.0319	42.3489		34.1816	31.3694		--	--		--	--		--	--		--	--		--	--		--	--		--	--		--	--		--	--		--	--
37.7479	41.1225		36.3315	33.2211		--	--		--	--		--	--		--	--		--	--		--	--		--	--		--	--		--	--		--	--
42.0369	45.4675		39.168	35.262		--	--		--	--		--	--		--	--		--	--		--	--		--	--		--	--		--	--		--	--
43.8821	49.4214		32.5553	36.5717		--	--		--	--		--	--		--	--		--	--		--	--		--	--		--	--		--	--		--	--
47.546	52.461		38.7981	37.5575		--	--		--	--		--	--		--	--		--	--		--	--		--	--		--	--		--	--		--	--
48.2617	54.801		35.9988	39.1647		--	--		--	--		--	--		--	--		--	--		--	--		--	--		--	--		--	--		--	--
48.4987	57.1141		36.4932	40.0085		--	--		--	--		--	--		--	--		--	--		--	--		--	--		--	--		--	--		--	--
48.8799	59.7273		45.7642	41.1516		--	--		--	--		--	--		--	--		--	--		--	--		--	--		--	--		--	--		--	--
50.3038	62.134		41.652	41.4171		--	--		--	--		--	--		--	--		--	--		--	--		--	--		--	--		--	--		--	--
54.8681	64.4219		39.7221	40.8165		--	--		--	--		--	--		--	--		--	--		--	--		--	--		--	--		--	--		--	--
56.8695	66.8061		37.8037	40.2864		--	--		--	--		--	--		--	--		--	--		--	--		--	--		--	--		--	--		--	--
56.6014	69.1801		39.2016	39.3385		--	--		--	--		--	--		--	--		--	--		--	--		--	--		--	--		--	--		--	--
48.4386	70.8137		34.4329	36.3587		--	--		--	--		--	--		--	--		--	--		--	--		--	--		--	--		--	--		--	--
54.556	72.3417		27.6459	33.7419		--	--		--	--		--	--		--	--		--	--		--	--		--	--		--	--		--	--		--	--
59.6624	74.3724		19.3436	31.7167		--	--		--	--		--	--		--	--		--	--		--	--		--	--		--	--		--	--		--	--
62.654	77.0112		24.786	30.3419		--	--		--	--		--	--		--	--		--	--		--	--		--	--		--	--		--	--		--	--
67.0072	79.6211		23.1441	29.3911		--	--		--	--		--	--		--	--		--	--		--	--		--	--		--	--		--	--		--	--
72.0689	81.9684		28.895	29.1226		--	--		--	--		--	--		--	--		--	--		--	--		--	--		--	--		--	--		--	--
77.7102	84.4639		28.5475	30.7151		--	--		--	--		--	--		--	--		--	--		--	--		--	--		--	--		--	--		--	--
85.5468	87.7059		30.1431	30.825		--	--		--	--		--	--		--	--		--	--		--	--		--	--		--	--		--	--		--	--
88.0286	91.5961		32.0737	32.1749		--	--		--	--		--	--		--	--		--	--		--	--		--	--		--	--		--	--		--	--
94.8631	95.6218		38.9634	31.4153		--	--		--	--		--	--		--	--		--	--		--	--		--	--		--	--		--	--		--	--
--	--		22.3961	32.6363		--	--		--	--		--	--		--	--		--	--		--	--		--	--		--	--		--	--		--	--
--	--		25.5687	35.8892		--	--		--	--		--	--		--	--		--	--		--	--		--	--		--	--		--	--		--	--
--	--		28.7412	38.9925		--	--		--	--		--	--		--	--		--	--		--	--		--	--		--	--		--	--		--	--
--	--		29.7414	40.4814		--	--		--	--		--	--		--	--		--	--		--	--		--	--		--	--		--	--		--	--
--	--		28.5692	40.4937		--	--		--	--		--	--		--	--		--	--		--	--		--	--		--	--		--	--		--	--
--	--		27.397	40.5432		--	--		--	--		--	--		--	--		--	--		--	--		--	--		--	--		--	--		--	--
--	--		28.2815	40.9901		--	--		--	--		--	--		--	--		--	--		--	--		--	--		--	--		--	--		--	--
--	--		31.5453	41.3715		--	--		--	--		--	--		--	--		--	--		--	--		--	--		--	--		--	--		--	--
--	--		31.1716	43.6038		--	--		--	--		--	--		--	--		--	--		--	--		--	--		--	--		--	--		--	--
--	--		35.1868	47.425		--	--		--	--		--	--		--	--		--	--		--	--		--	--		--	--		--	--		--	--
--	--		41.9673	51.1046		--	--		--	--		--	--		--	--		--	--		--	--		--	--		--	--		--	--		--	--
--	--		48.3076	54.3767		--	--		--	--		--	--		--	--		--	--		--	--		--	--		--	--		--	--		--	--
--	--		51.9534	57.5303		--	--		--	--		--	--		--	--		--	--		--	--		--	--		--	--		--	--		--	--
--	--		50.9176	59.213		--	--		--	--		--	--		--	--		--	--		--	--		--	--		--	--		--	--		--	--
--	--		47.4305	59.1071		--	--		--	--		--	--		--	--		--	--		--	--		--	--		--	--		--	--		--	--
--	--		47.8573	58.8332		--	--		--	--		--	--		--	--		--	--		--	--		--	--		--	--		--	--		--	--
--	--		49.8567	61.3441		--	--		--	--		--	--		--	--		--	--		--	--		--	--		--	--		--	--		--	--
--	--		59.7631	63.9372		--	--		--	--		--	--		--	--		--	--		--	--		--	--		--	--		--	--		--	--
--	--		63.682	67.1523		--	--		--	--		--	--		--	--		--	--		--	--		--	--		--	--		--	--		--	--
--	--		66.7871	70.4129		--	--		--	--		--	--		--	--		--	--		--	--		--	--		--	--		--	--		--	--
--	--		76.1402	73.4197		--	--		--	--		--	--		--	--		--	--		--	--		--	--		--	--		--	--		--	--
--	--		82.4958	78.2297		--	--		--	--		--	--		--	--		--	--		--	--		--	--		--	--		--	--		--	--
--	--		95.9489	83.081		--	--		--	--		--	--		--	--		--	--		--	--		--	--		--	--		--	--		--	--
--	--		113.283	87.3531		--	--		--	--		--	--		--	--		--	--		--	--		--	--		--	--		--	--		--	--
--	--		117.195	92.765		--	--		--	--		--	--		--	--		--	--		--	--		--	--		--	--		--	--		--	--
--	--		123.852	97.4827		--	--		--	--		--	--		--	--		--	--		--	--		--	--		--	--		--	--		--	--
--	--		1.95652	1.67021		--	--		--	--		--	--		--	--		--	--		--	--		--	--		--	--		--	--		--	--
--	--		2.08179	1.77276		--	--		--	--		--	--		--	--		--	--		--	--		--	--		--	--		--	--		--	--
--	--		2.20706	1.87711		--	--		--	--		--	--		--	--		--	--		--	--		--	--		--	--		--	--		--	--
--	--		2.24164	1.8932		--	--		--	--		--	--		--	--		--	--		--	--		--	--		--	--		--	--		--	--
--	--		2.18553	1.82301		--	--		--	--		--	--		--	--		--	--		--	--		--	--		--	--		--	--		--	--
--	--		2.12942	1.75731		--	--		--	--		--	--		--	--		--	--		--	--		--	--		--	--		--	--		--	--
--	--		1.94975	1.85357		--	--		--	--		--	--		--	--		--	--		--	--		--	--		--	--		--	--		--	--
--	--		1.98145	1.9497		--	--		--	--		--	--		--	--		--	--		--	--		--	--		--	--		--	--		--	--
--	--		2.34459	1.98912		--	--		--	--		--	--		--	--		--	--		--	--		--	--		--	--		--	--		--	--
--	--		2.38664	1.97416		--	--		--	--		--	--		--	--		--	--		--	--		--	--		--	--		--	--		--	--
--	--		2.3888	1.95815		--	--		--	--		--	--		--	--		--	--		--	--		--	--		--	--		--	--		--	--
--	--		2.60476	2.42118		--	--		--	--		--	--		--	--		--	--		--	--		--	--		--	--		--	--		--	--
--	--		2.64665	2.88157		--	--		--	--		--	--		--	--		--	--		--	--		--	--		--	--		--	--		--	--
--	--		2.88549	3.12724		--	--		--	--		--	--		--	--		--	--		--	--		--	--		--	--		--	--		--	--
--	--		2.94599	3.15946		--	--		--	--		--	--		--	--		--	--		--	--		--	--		--	--		--	--		--	--
--	--		3.32631	3.19834		--	--		--	--		--	--		--	--		--	--		--	--		--	--		--	--		--	--		--	--
--	--		3.38959	3.1555		--	--		--	--		--	--		--	--		--	--		--	--		--	--		--	--		--	--		--	--
--	--		2.70138	3.11161		--	--		--	--		--	--		--	--		--	--		--	--		--	--		--	--		--	--		--	--
--	--		2.92601	3.10776		--	--		--	--		--	--		--	--		--	--		--	--		--	--		--	--		--	--		--	--
--	--		2.91772	3.13623		--	--		--	--		--	--		--	--		--	--		--	--		--	--		--	--		--	--		--	--
--	--		3.35283	3.18166		--	--		--	--		--	--		--	--		--	--		--	--		--	--		--	--		--	--		--	--
--	--		3.94219	3.19417		--	--		--	--		--	--		--	--		--	--		--	--		--	--		--	--		--	--		--	--
--	--		4.13761	3.20123		--	--		--	--		--	--		--	--		--	--		--	--		--	--		--	--		--	--		--	--
--	--		3.63321	3.26534		--	--		--	--		--	--		--	--		--	--		--	--		--	--		--	--		--	--		--	--
--	--		3.80377	3.34572		--	--		--	--		--	--		--	--		--	--		--	--		--	--		--	--		--	--		--	--
--	--		3.80859	3.4327		--	--		--	--		--	--		--	--		--	--		--	--		--	--		--	--		--	--		--	--
--	--		18.8291	19.9988		--	--		--	--		--	--		--	--		--	--		--	--		--	--		--	--		--	--		--	--
--	--		22.3058	22.1132		--	--		--	--		--	--		--	--		--	--		--	--		--	--		--	--		--	--		--	--
--	--		25.7825	24.2208		--	--		--	--		--	--		--	--		--	--		--	--		--	--		--	--		--	--		--	--
--	--		26.7421	25.4772		--	--		--	--		--	--		--	--		--	--		--	--		--	--		--	--		--	--		--	--
--	--		25.1846	25.9525		--	--		--	--		--	--		--	--		--	--		--	--		--	--		--	--		--	--		--	--
--	--		23.6271	26.4709		--	--		--	--		--	--		--	--		--	--		--	--		--	--		--	--		--	--		--	--
--	--		23.7239	27.7799		--	--		--	--		--	--		--	--		--	--		--	--		--	--		--	--		--	--		--	--
--	--		26.4276	29.1215		--	--		--	--		--	--		--	--		--	--		--	--		--	--		--	--		--	--		--	--
--	--		26.6866	30.4904		--	--		--	--		--	--		--	--		--	--		--	--		--	--		--	--		--	--		--	--
--	--		25.8773	31.4975		--	--		--	--		--	--		--	--		--	--		--	--		--	--		--	--		--	--		--	--
--	--		20.8023	32.2865		--	--		--	--		--	--		--	--		--	--		--	--		--	--		--	--		--	--		--	--
--	--		23.8205	32.7298		--	--		--	--		--	--		--	--		--	--		--	--		--	--		--	--		--	--		--	--
--	--		26.8099	33.247		--	--		--	--		--	--		--	--		--	--		--	--		--	--		--	--		--	--		--	--
--	--		27.1841	34.394		--	--		--	--		--	--		--	--		--	--		--	--		--	--		--	--		--	--		--	--
--	--		27.1419	35.7109		--	--		--	--		--	--		--	--		--	--		--	--		--	--		--	--		--	--		--	--
--	--		28.8555	36.527		--	--		--	--		--	--		--	--		--	--		--	--		--	--		--	--		--	--		--	--
--	--		42.7871	35.3582		--	--		--	--		--	--		--	--		--	--		--	--		--	--		--	--		--	--		--	--
--	--		35.1406	32.9183		--	--		--	--		--	--		--	--		--	--		--	--		--	--		--	--		--	--		--	--
--	--		36.1871	31.2058		--	--		--	--		--	--		--	--		--	--		--	--		--	--		--	--		--	--		--	--
--	--		28.4429	30.7828		--	--		--	--		--	--		--	--		--	--		--	--		--	--		--	--		--	--		--	--
--	--		31.8344	30.243		--	--		--	--		--	--		--	--		--	--		--	--		--	--		--	--		--	--		--	--
--	--		24.365	29.3645		--	--		--	--		--	--		--	--		--	--		--	--		--	--		--	--		--	--		--	--
--	--		29.8679	29.1882		--	--		--	--		--	--		--	--		--	--		--	--		--	--		--	--		--	--		--	--
--	--		36.6182	30.1647		--	--		--	--		--	--		--	--		--	--		--	--		--	--		--	--		--	--		--	--
--	--		33.1448	31.4729		--	--		--	--		--	--		--	--		--	--		--	--		--	--		--	--		--	--		--	--
--	--		36.9407	32.9402		--	--		--	--		--	--		--	--		--	--		--	--		--	--		--	--		--	--		--	--
--	--		7.61761	6.80804		--	--		--	--		--	--		--	--		--	--		--	--		--	--		--	--		--	--		--	--
--	--		8.02087	6.93981		--	--		--	--		--	--		--	--		--	--		--	--		--	--		--	--		--	--		--	--
--	--		8.42413	7.0643		--	--		--	--		--	--		--	--		--	--		--	--		--	--		--	--		--	--		--	--
--	--		9.03092	7.22012		--	--		--	--		--	--		--	--		--	--		--	--		--	--		--	--		--	--		--	--
--	--		9.84125	7.37841		--	--		--	--		--	--		--	--		--	--		--	--		--	--		--	--		--	--		--	--
--	--		10.6516	7.49423		--	--		--	--		--	--		--	--		--	--		--	--		--	--		--	--		--	--		--	--
--	--		6.07261	7.87964		--	--		--	--		--	--		--	--		--	--		--	--		--	--		--	--		--	--		--	--
--	--		2.52588	8.25584		--	--		--	--		--	--		--	--		--	--		--	--		--	--		--	--		--	--		--	--
--	--		3.53956	8.59047		--	--		--	--		--	--		--	--		--	--		--	--		--	--		--	--		--	--		--	--
--	--		3.17946	8.90683		--	--		--	--		--	--		--	--		--	--		--	--		--	--		--	--		--	--		--	--
--	--		4.8867	9.23029		--	--		--	--		--	--		--	--		--	--		--	--		--	--		--	--		--	--		--	--
--	--		5.5122	9.29309		--	--		--	--		--	--		--	--		--	--		--	--		--	--		--	--		--	--		--	--
--	--		3.83836	9.33912		--	--		--	--		--	--		--	--		--	--		--	--		--	--		--	--		--	--		--	--
--	--		5.91514	9.3912		--	--		--	--		--	--		--	--		--	--		--	--		--	--		--	--		--	--		--	--
--	--		7.04393	9.46655		--	--		--	--		--	--		--	--		--	--		--	--		--	--		--	--		--	--		--	--
--	--		7.34239	9.56112		--	--		--	--		--	--		--	--		--	--		--	--		--	--		--	--		--	--		--	--
--	--		6.49924	9.67923		--	--		--	--		--	--		--	--		--	--		--	--		--	--		--	--		--	--		--	--
--	--		6.34923	9.82486		--	--		--	--		--	--		--	--		--	--		--	--		--	--		--	--		--	--		--	--
--	--		9.38538	9.91329		--	--		--	--		--	--		--	--		--	--		--	--		--	--		--	--		--	--		--	--
--	--		10.015	9.96895		--	--		--	--		--	--		--	--		--	--		--	--		--	--		--	--		--	--		--	--
--	--		11.2153	9.9775		--	--		--	--		--	--		--	--		--	--		--	--		--	--		--	--		--	--		--	--
--	--		10.7825	10.2395		--	--		--	--		--	--		--	--		--	--		--	--		--	--		--	--		--	--		--	--
--	--		12.9397	10.5979		--	--		--	--		--	--		--	--		--	--		--	--		--	--		--	--		--	--		--	--
--	--		18.72	11.323		--	--		--	--		--	--		--	--		--	--		--	--		--	--		--	--		--	--		--	--
--	--		21.3387	12.2952		--	--		--	--		--	--		--	--		--	--		--	--		--	--		--	--		--	--		--	--
--	--		25.1302	13.2237		--	--		--	--		--	--		--	--		--	--		--	--		--	--		--	--		--	--		--	--
--	--		5.6963	7.10424		--	--		--	--		--	--		--	--		--	--		--	--		--	--		--	--		--	--		--	--
--	--		6.29406	7.66864		--	--		--	--		--	--		--	--		--	--		--	--		--	--		--	--		--	--		--	--
--	--		6.89182	8.23402		--	--		--	--		--	--		--	--		--	--		--	--		--	--		--	--		--	--		--	--
--	--		7.25458	8.56202		--	--		--	--		--	--		--	--		--	--		--	--		--	--		--	--		--	--		--	--
--	--		7.38236	8.65813		--	--		--	--		--	--		--	--		--	--		--	--		--	--		--	--		--	--		--	--
--	--		7.51013	8.76093		--	--		--	--		--	--		--	--		--	--		--	--		--	--		--	--		--	--		--	--
--	--		8.3138	9.42307		--	--		--	--		--	--		--	--		--	--		--	--		--	--		--	--		--	--		--	--
--	--		8.06623	10.0335		--	--		--	--		--	--		--	--		--	--		--	--		--	--		--	--		--	--		--	--
--	--		8.31334	10.4215		--	--		--	--		--	--		--	--		--	--		--	--		--	--		--	--		--	--		--	--
--	--		8.2778	10.6421		--	--		--	--		--	--		--	--		--	--		--	--		--	--		--	--		--	--		--	--
--	--		9.02546	10.8563		--	--		--	--		--	--		--	--		--	--		--	--		--	--		--	--		--	--		--	--
--	--		9.12472	10.9167		--	--		--	--		--	--		--	--		--	--		--	--		--	--		--	--		--	--		--	--
--	--		8.92013	10.9748		--	--		--	--		--	--		--	--		--	--		--	--		--	--		--	--		--	--		--	--
--	--		10.441	11.1323		--	--		--	--		--	--		--	--		--	--		--	--		--	--		--	--		--	--		--	--
--	--		9.73641	11.3586		--	--		--	--		--	--		--	--		--	--		--	--		--	--		--	--		--	--		--	--
--	--		10.6891	11.595		--	--		--	--		--	--		--	--		--	--		--	--		--	--		--	--		--	--		--	--
--	--		10.8835	12.2723		--	--		--	--		--	--		--	--		--	--		--	--		--	--		--	--		--	--		--	--
--	--		11.4933	12.9488		--	--		--	--		--	--		--	--		--	--		--	--		--	--		--	--		--	--		--	--
--	--		13.333	13.6253		--	--		--	--		--	--		--	--		--	--		--	--		--	--		--	--		--	--		--	--
--	--		13.4251	14.3386		--	--		--	--		--	--		--	--		--	--		--	--		--	--		--	--		--	--		--	--
--	--		14.2896	15.1249		--	--		--	--		--	--		--	--		--	--		--	--		--	--		--	--		--	--		--	--
--	--		15.088	16.2991		--	--		--	--		--	--		--	--		--	--		--	--		--	--		--	--		--	--		--	--
--	--		16.0426	17.3875		--	--		--	--		--	--		--	--		--	--		--	--		--	--		--	--		--	--		--	--
--	--		20.3932	18.9378		--	--		--	--		--	--		--	--		--	--		--	--		--	--		--	--		--	--		--	--
--	--		21.941	20.8013		--	--		--	--		--	--		--	--		--	--		--	--		--	--		--	--		--	--		--	--
--	--		29.1239	22.4558		--	--		--	--		--	--		--	--		--	--		--	--		--	--		--	--		--	--		--	--
--	--		61.7089	91.4368		--	--		--	--		--	--		--	--		--	--		--	--		--	--		--	--		--	--		--	--
--	--		98.1447	127.245		--	--		--	--		--	--		--	--		--	--		--	--		--	--		--	--		--	--		--	--
--	--		134.581	155.575		--	--		--	--		--	--		--	--		--	--		--	--		--	--		--	--		--	--		--	--
--	--		154.683	168.627		--	--		--	--		--	--		--	--		--	--		--	--		--	--		--	--		--	--		--	--
--	--		158.452	170.419		--	--		--	--		--	--		--	--		--	--		--	--		--	--		--	--		--	--		--	--
--	--		162.221	172.102		--	--		--	--		--	--		--	--		--	--		--	--		--	--		--	--		--	--		--	--
--	--		161.684	173.032		--	--		--	--		--	--		--	--		--	--		--	--		--	--		--	--		--	--		--	--
--	--		158.986	174.7		--	--		--	--		--	--		--	--		--	--		--	--		--	--		--	--		--	--		--	--
--	--		182.194	178.925		--	--		--	--		--	--		--	--		--	--		--	--		--	--		--	--		--	--		--	--
--	--		187.838	186.59		--	--		--	--		--	--		--	--		--	--		--	--		--	--		--	--		--	--		--	--
--	--		193.132	193.762		--	--		--	--		--	--		--	--		--	--		--	--		--	--		--	--		--	--		--	--
--	--		215.325	197.775		--	--		--	--		--	--		--	--		--	--		--	--		--	--		--	--		--	--		--	--
--	--		210.715	202.152		--	--		--	--		--	--		--	--		--	--		--	--		--	--		--	--		--	--		--	--
--	--		213.696	205.318		--	--		--	--		--	--		--	--		--	--		--	--		--	--		--	--		--	--		--	--
--	--		189.969	207.625		--	--		--	--		--	--		--	--		--	--		--	--		--	--		--	--		--	--		--	--
--	--		215.972	209.691		--	--		--	--		--	--		--	--		--	--		--	--		--	--		--	--		--	--		--	--
--	--		218.651	213.502		--	--		--	--		--	--		--	--		--	--		--	--		--	--		--	--		--	--		--	--
--	--		226.88	217.631		--	--		--	--		--	--		--	--		--	--		--	--		--	--		--	--		--	--		--	--
--	--		237.63	220.428		--	--		--	--		--	--		--	--		--	--		--	--		--	--		--	--		--	--		--	--
--	--		248.736	221.313		--	--		--	--		--	--		--	--		--	--		--	--		--	--		--	--		--	--		--	--
--	--		237.148	221.142		--	--		--	--		--	--		--	--		--	--		--	--		--	--		--	--		--	--		--	--
--	--		202.251	224.375		--	--		--	--		--	--		--	--		--	--		--	--		--	--		--	--		--	--		--	--
--	--		249.626	227.877		--	--		--	--		--	--		--	--		--	--		--	--		--	--		--	--		--	--		--	--
--	--		260.178	231.002		--	--		--	--		--	--		--	--		--	--		--	--		--	--		--	--		--	--		--	--
--	--		262.992	234.364		--	--		--	--		--	--		--	--		--	--		--	--		--	--		--	--		--	--		--	--
--	--		268.091	236.354		--	--		--	--		--	--		--	--		--	--		--	--		--	--		--	--		--	--		--	--
--	--		0.06732	0.05426		--	--		--	--		--	--		--	--		--	--		--	--		--	--		--	--		--	--		--	--
--	--		0.07642	0.0569		--	--		--	--		--	--		--	--		--	--		--	--		--	--		--	--		--	--		--	--
--	--		0.08553	0.05921		--	--		--	--		--	--		--	--		--	--		--	--		--	--		--	--		--	--		--	--
--	--		0.076	0.05634		--	--		--	--		--	--		--	--		--	--		--	--		--	--		--	--		--	--		--	--
--	--		0.04784	0.04857		--	--		--	--		--	--		--	--		--	--		--	--		--	--		--	--		--	--		--	--
--	--		0.01968	0.04078		--	--		--	--		--	--		--	--		--	--		--	--		--	--		--	--		--	--		--	--
--	--		0.01453	0.04103		--	--		--	--		--	--		--	--		--	--		--	--		--	--		--	--		--	--		--	--
--	--		0.01899	0.04127		--	--		--	--		--	--		--	--		--	--		--	--		--	--		--	--		--	--		--	--
--	--		0.03172	0.04147		--	--		--	--		--	--		--	--		--	--		--	--		--	--		--	--		--	--		--	--
--	--		0.0245	0.04203		--	--		--	--		--	--		--	--		--	--		--	--		--	--		--	--		--	--		--	--
--	--		0.06399	0.04297		--	--		--	--		--	--		--	--		--	--		--	--		--	--		--	--		--	--		--	--
--	--		0.03122	0.04315		--	--		--	--		--	--		--	--		--	--		--	--		--	--		--	--		--	--		--	--
--	--		0.034	0.04294		--	--		--	--		--	--		--	--		--	--		--	--		--	--		--	--		--	--		--	--
--	--		0.06396	0.04421		--	--		--	--		--	--		--	--		--	--		--	--		--	--		--	--		--	--		--	--
--	--		0.09665	0.04672		--	--		--	--		--	--		--	--		--	--		--	--		--	--		--	--		--	--		--	--
--	--		0.07515	0.0491		--	--		--	--		--	--		--	--		--	--		--	--		--	--		--	--		--	--		--	--
--	--		0.0592	0.05231		--	--		--	--		--	--		--	--		--	--		--	--		--	--		--	--		--	--		--	--
--	--		0.04603	0.05496		--	--		--	--		--	--		--	--		--	--		--	--		--	--		--	--		--	--		--	--
--	--		0.05038	0.05816		--	--		--	--		--	--		--	--		--	--		--	--		--	--		--	--		--	--		--	--
--	--		0.03827	0.06258		--	--		--	--		--	--		--	--		--	--		--	--		--	--		--	--		--	--		--	--
--	--		0.12107	0.06717		--	--		--	--		--	--		--	--		--	--		--	--		--	--		--	--		--	--		--	--
--	--		0.06573	0.06801		--	--		--	--		--	--		--	--		--	--		--	--		--	--		--	--		--	--		--	--
--	--		0.08072	0.06852		--	--		--	--		--	--		--	--		--	--		--	--		--	--		--	--		--	--		--	--
--	--		0.0618	0.06881		--	--		--	--		--	--		--	--		--	--		--	--		--	--		--	--		--	--		--	--
--	--		0.08411	0.06895		--	--		--	--		--	--		--	--		--	--		--	--		--	--		--	--		--	--		--	--
--	--		0.07351	0.06901		--	--		--	--		--	--		--	--		--	--		--	--		--	--		--	--		--	--		--	--
--	--		1.36158	2.00494		--	--		--	--		--	--		--	--		--	--		--	--		--	--		--	--		--	--		--	--
--	--		1.39539	2.04739		--	--		--	--		--	--		--	--		--	--		--	--		--	--		--	--		--	--		--	--
--	--		1.42919	2.09057		--	--		--	--		--	--		--	--		--	--		--	--		--	--		--	--		--	--		--	--
--	--		1.52167	2.12807		--	--		--	--		--	--		--	--		--	--		--	--		--	--		--	--		--	--		--	--
--	--		1.67282	2.10441		--	--		--	--		--	--		--	--		--	--		--	--		--	--		--	--		--	--		--	--
--	--		1.82397	2.01415		--	--		--	--		--	--		--	--		--	--		--	--		--	--		--	--		--	--		--	--
--	--		2.09708	2.10082		--	--		--	--		--	--		--	--		--	--		--	--		--	--		--	--		--	--		--	--
--	--		2.01371	2.17543		--	--		--	--		--	--		--	--		--	--		--	--		--	--		--	--		--	--		--	--
--	--		2.13051	2.3027		--	--		--	--		--	--		--	--		--	--		--	--		--	--		--	--		--	--		--	--
--	--		1.8907	2.48792		--	--		--	--		--	--		--	--		--	--		--	--		--	--		--	--		--	--		--	--
--	--		1.98798	2.67667		--	--		--	--		--	--		--	--		--	--		--	--		--	--		--	--		--	--		--	--
--	--		2.11207	2.71718		--	--		--	--		--	--		--	--		--	--		--	--		--	--		--	--		--	--		--	--
--	--		1.98928	2.76055		--	--		--	--		--	--		--	--		--	--		--	--		--	--		--	--		--	--		--	--
--	--		2.14745	2.8241		--	--		--	--		--	--		--	--		--	--		--	--		--	--		--	--		--	--		--	--
--	--		1.98156	2.90924		--	--		--	--		--	--		--	--		--	--		--	--		--	--		--	--		--	--		--	--
--	--		1.93383	2.99713		--	--		--	--		--	--		--	--		--	--		--	--		--	--		--	--		--	--		--	--
--	--		1.74254	3.05339		--	--		--	--		--	--		--	--		--	--		--	--		--	--		--	--		--	--		--	--
--	--		1.84274	3.10648		--	--		--	--		--	--		--	--		--	--		--	--		--	--		--	--		--	--		--	--
--	--		2.1322	3.14448		--	--		--	--		--	--		--	--		--	--		--	--		--	--		--	--		--	--		--	--
--	--		2.23146	3.16986		--	--		--	--		--	--		--	--		--	--		--	--		--	--		--	--		--	--		--	--
--	--		2.24886	3.19662		--	--		--	--		--	--		--	--		--	--		--	--		--	--		--	--		--	--		--	--
--	--		2.29246	3.33411		--	--		--	--		--	--		--	--		--	--		--	--		--	--		--	--		--	--		--	--
--	--		2.30327	3.47516		--	--		--	--		--	--		--	--		--	--		--	--		--	--		--	--		--	--		--	--
--	--		2.31844	3.56321		--	--		--	--		--	--		--	--		--	--		--	--		--	--		--	--		--	--		--	--
--	--		2.52361	3.6006		--	--		--	--		--	--		--	--		--	--		--	--		--	--		--	--		--	--		--	--
--	--		2.62609	3.6393		--	--		--	--		--	--		--	--		--	--		--	--		--	--		--	--		--	--		--	--
--	--		5.62764	5.13162		--	--		--	--		--	--		--	--		--	--		--	--		--	--		--	--		--	--		--	--
--	--		5.98522	5.35901		--	--		--	--		--	--		--	--		--	--		--	--		--	--		--	--		--	--		--	--
--	--		6.34281	5.59209		--	--		--	--		--	--		--	--		--	--		--	--		--	--		--	--		--	--		--	--
--	--		6.75735	5.76639		--	--		--	--		--	--		--	--		--	--		--	--		--	--		--	--		--	--		--	--
--	--		7.22885	5.79052		--	--		--	--		--	--		--	--		--	--		--	--		--	--		--	--		--	--		--	--
--	--		7.70036	5.74677		--	--		--	--		--	--		--	--		--	--		--	--		--	--		--	--		--	--		--	--
--	--		7.12135	6.87656		--	--		--	--		--	--		--	--		--	--		--	--		--	--		--	--		--	--		--	--
--	--		8.16253	7.98188		--	--		--	--		--	--		--	--		--	--		--	--		--	--		--	--		--	--		--	--
--	--		7.59185	8.83949		--	--		--	--		--	--		--	--		--	--		--	--		--	--		--	--		--	--		--	--
--	--		8.93024	9.62769		--	--		--	--		--	--		--	--		--	--		--	--		--	--		--	--		--	--		--	--
--	--		9.72708	10.4751		--	--		--	--		--	--		--	--		--	--		--	--		--	--		--	--		--	--		--	--
--	--		9.88566	10.8362		--	--		--	--		--	--		--	--		--	--		--	--		--	--		--	--		--	--		--	--
--	--		10.6168	11.2406		--	--		--	--		--	--		--	--		--	--		--	--		--	--		--	--		--	--		--	--
--	--		10.4331	11.7764		--	--		--	--		--	--		--	--		--	--		--	--		--	--		--	--		--	--		--	--
--	--		10.692	12.4251		--	--		--	--		--	--		--	--		--	--		--	--		--	--		--	--		--	--		--	--
--	--		10.6387	13.0033		--	--		--	--		--	--		--	--		--	--		--	--		--	--		--	--		--	--		--	--
--	--		9.58203	12.9591		--	--		--	--		--	--		--	--		--	--		--	--		--	--		--	--		--	--		--	--
--	--		11.9854	12.9999		--	--		--	--		--	--		--	--		--	--		--	--		--	--		--	--		--	--		--	--
--	--		10.0128	13.1051		--	--		--	--		--	--		--	--		--	--		--	--		--	--		--	--		--	--		--	--
--	--		11.8725	13.2332		--	--		--	--		--	--		--	--		--	--		--	--		--	--		--	--		--	--		--	--
--	--		12.0727	13.3866		--	--		--	--		--	--		--	--		--	--		--	--		--	--		--	--		--	--		--	--
--	--		12.3531	13.6059		--	--		--	--		--	--		--	--		--	--		--	--		--	--		--	--		--	--		--	--
--	--		12.0709	13.8619		--	--		--	--		--	--		--	--		--	--		--	--		--	--		--	--		--	--		--	--
--	--		13.8735	13.895		--	--		--	--		--	--		--	--		--	--		--	--		--	--		--	--		--	--		--	--
--	--		15.0711	13.7554		--	--		--	--		--	--		--	--		--	--		--	--		--	--		--	--		--	--		--	--
--	--		16.867	13.4833		--	--		--	--		--	--		--	--		--	--		--	--		--	--		--	--		--	--		--	--
--	--		3.65935	4.70028		--	--		--	--		--	--		--	--		--	--		--	--		--	--		--	--		--	--		--	--
--	--		3.76223	4.78593		--	--		--	--		--	--		--	--		--	--		--	--		--	--		--	--		--	--		--	--
--	--		3.86512	4.8709		--	--		--	--		--	--		--	--		--	--		--	--		--	--		--	--		--	--		--	--
--	--		3.86466	4.78629		--	--		--	--		--	--		--	--		--	--		--	--		--	--		--	--		--	--		--	--
--	--		3.76085	4.54002		--	--		--	--		--	--		--	--		--	--		--	--		--	--		--	--		--	--		--	--
--	--		3.65704	4.31525		--	--		--	--		--	--		--	--		--	--		--	--		--	--		--	--		--	--		--	--
--	--		3.29809	5.03827		--	--		--	--		--	--		--	--		--	--		--	--		--	--		--	--		--	--		--	--
--	--		3.66527	5.7466		--	--		--	--		--	--		--	--		--	--		--	--		--	--		--	--		--	--		--	--
--	--		3.89367	5.9917		--	--		--	--		--	--		--	--		--	--		--	--		--	--		--	--		--	--		--	--
--	--		4.03888	5.78929		--	--		--	--		--	--		--	--		--	--		--	--		--	--		--	--		--	--		--	--
--	--		3.43312	5.58397		--	--		--	--		--	--		--	--		--	--		--	--		--	--		--	--		--	--		--	--
--	--		2.96037	5.62485		--	--		--	--		--	--		--	--		--	--		--	--		--	--		--	--		--	--		--	--
--	--		2.93513	5.65789		--	--		--	--		--	--		--	--		--	--		--	--		--	--		--	--		--	--		--	--
--	--		3.62461	5.68083		--	--		--	--		--	--		--	--		--	--		--	--		--	--		--	--		--	--		--	--
--	--		4.55415	5.70589		--	--		--	--		--	--		--	--		--	--		--	--		--	--		--	--		--	--		--	--
--	--		4.35374	5.73587		--	--		--	--		--	--		--	--		--	--		--	--		--	--		--	--		--	--		--	--
--	--		5.48054	6.02666		--	--		--	--		--	--		--	--		--	--		--	--		--	--		--	--		--	--		--	--
--	--		6.31577	6.31626		--	--		--	--		--	--		--	--		--	--		--	--		--	--		--	--		--	--		--	--
--	--		6.24314	6.56417		--	--		--	--		--	--		--	--		--	--		--	--		--	--		--	--		--	--		--	--
--	--		7.87095	6.7689		--	--		--	--		--	--		--	--		--	--		--	--		--	--		--	--		--	--		--	--
--	--		6.56241	6.96766		--	--		--	--		--	--		--	--		--	--		--	--		--	--		--	--		--	--		--	--
--	--		8.0308	7.9493		--	--		--	--		--	--		--	--		--	--		--	--		--	--		--	--		--	--		--	--
--	--		8.43889	8.93765		--	--		--	--		--	--		--	--		--	--		--	--		--	--		--	--		--	--		--	--
--	--		9.27365	10.3474		--	--		--	--		--	--		--	--		--	--		--	--		--	--		--	--		--	--		--	--
--	--		9.54625	12.1729		--	--		--	--		--	--		--	--		--	--		--	--		--	--		--	--		--	--		--	--
--	--		9.84989	14.0009		--	--		--	--		--	--		--	--		--	--		--	--		--	--		--	--		--	--		--	--
--	--		6.90346	8.69807		--	--		--	--		--	--		--	--		--	--		--	--		--	--		--	--		--	--		--	--
--	--		7.91412	9.56447		--	--		--	--		--	--		--	--		--	--		--	--		--	--		--	--		--	--		--	--
--	--		8.92478	10.4335		--	--		--	--		--	--		--	--		--	--		--	--		--	--		--	--		--	--		--	--
--	--		9.2763	10.6699		--	--		--	--		--	--		--	--		--	--		--	--		--	--		--	--		--	--		--	--
--	--		8.96869	10.3123		--	--		--	--		--	--		--	--		--	--		--	--		--	--		--	--		--	--		--	--
--	--		8.66107	10.0018		--	--		--	--		--	--		--	--		--	--		--	--		--	--		--	--		--	--		--	--
--	--		9.23118	10.4075		--	--		--	--		--	--		--	--		--	--		--	--		--	--		--	--		--	--		--	--
--	--		7.52015	10.8822		--	--		--	--		--	--		--	--		--	--		--	--		--	--		--	--		--	--		--	--
--	--		7.19215	10.908		--	--		--	--		--	--		--	--		--	--		--	--		--	--		--	--		--	--		--	--
--	--		6.92801	10.7543		--	--		--	--		--	--		--	--		--	--		--	--		--	--		--	--		--	--		--	--
--	--		9.0111	10.6557		--	--		--	--		--	--		--	--		--	--		--	--		--	--		--	--		--	--		--	--
--	--		6.51432	11.3792		--	--		--	--		--	--		--	--		--	--		--	--		--	--		--	--		--	--		--	--
--	--		8.93371	12.1204		--	--		--	--		--	--		--	--		--	--		--	--		--	--		--	--		--	--		--	--
--	--		13.8354	13.0612		--	--		--	--		--	--		--	--		--	--		--	--		--	--		--	--		--	--		--	--
--	--		14.7343	14.1358		--	--		--	--		--	--		--	--		--	--		--	--		--	--		--	--		--	--		--	--
--	--		15.5908	15.1239		--	--		--	--		--	--		--	--		--	--		--	--		--	--		--	--		--	--		--	--
--	--		16.7125	15.367		--	--		--	--		--	--		--	--		--	--		--	--		--	--		--	--		--	--		--	--
--	--		16.1987	15.6725		--	--		--	--		--	--		--	--		--	--		--	--		--	--		--	--		--	--		--	--
--	--		15.5159	15.9973		--	--		--	--		--	--		--	--		--	--		--	--		--	--		--	--		--	--		--	--
--	--		17.0917	16.4448		--	--		--	--		--	--		--	--		--	--		--	--		--	--		--	--		--	--		--	--
--	--		16.0461	16.8049		--	--		--	--		--	--		--	--		--	--		--	--		--	--		--	--		--	--		--	--
--	--		19.8508	17.8983		--	--		--	--		--	--		--	--		--	--		--	--		--	--		--	--		--	--		--	--
--	--		20.691	18.9042		--	--		--	--		--	--		--	--		--	--		--	--		--	--		--	--		--	--		--	--
--	--		20.2644	19.3347		--	--		--	--		--	--		--	--		--	--		--	--		--	--		--	--		--	--		--	--
--	--		17.6113	19.551		--	--		--	--		--	--		--	--		--	--		--	--		--	--		--	--		--	--		--	--
--	--		17.2937	19.5859		--	--		--	--		--	--		--	--		--	--		--	--		--	--		--	--		--	--		--	--
--	--		456.313	545.145		--	--		--	--		--	--		--	--		--	--		--	--		--	--		--	--		--	--		--	--
--	--		561.179	619.976		--	--		--	--		--	--		--	--		--	--		--	--		--	--		--	--		--	--		--	--
--	--		666.044	687.692		--	--		--	--		--	--		--	--		--	--		--	--		--	--		--	--		--	--		--	--
--	--		717.93	722.971		--	--		--	--		--	--		--	--		--	--		--	--		--	--		--	--		--	--		--	--
--	--		716.835	729.599		--	--		--	--		--	--		--	--		--	--		--	--		--	--		--	--		--	--		--	--
--	--		715.741	734.984		--	--		--	--		--	--		--	--		--	--		--	--		--	--		--	--		--	--		--	--
--	--		771.268	791.842		--	--		--	--		--	--		--	--		--	--		--	--		--	--		--	--		--	--		--	--
--	--		840.056	853.015		--	--		--	--		--	--		--	--		--	--		--	--		--	--		--	--		--	--		--	--
--	--		864.534	900.919		--	--		--	--		--	--		--	--		--	--		--	--		--	--		--	--		--	--		--	--
--	--		954.483	940.729		--	--		--	--		--	--		--	--		--	--		--	--		--	--		--	--		--	--		--	--
--	--		1004.29	995.267		--	--		--	--		--	--		--	--		--	--		--	--		--	--		--	--		--	--		--	--
--	--		1143.65	1095.51		--	--		--	--		--	--		--	--		--	--		--	--		--	--		--	--		--	--		--	--
--	--		1285.34	1203.42		--	--		--	--		--	--		--	--		--	--		--	--		--	--		--	--		--	--		--	--
--	--		1311.44	1265.3		--	--		--	--		--	--		--	--		--	--		--	--		--	--		--	--		--	--		--	--
--	--		1351.69	1349.27		--	--		--	--		--	--		--	--		--	--		--	--		--	--		--	--		--	--		--	--
--	--		1448.78	1436.6		--	--		--	--		--	--		--	--		--	--		--	--		--	--		--	--		--	--		--	--
--	--		1526.84	1547.67		--	--		--	--		--	--		--	--		--	--		--	--		--	--		--	--		--	--		--	--
--	--		1598.99	1631.03		--	--		--	--		--	--		--	--		--	--		--	--		--	--		--	--		--	--		--	--
--	--		1729.06	1747.76		--	--		--	--		--	--		--	--		--	--		--	--		--	--		--	--		--	--		--	--
--	--		1800.86	1859.23		--	--		--	--		--	--		--	--		--	--		--	--		--	--		--	--		--	--		--	--
--	--		1770.16	1941.56		--	--		--	--		--	--		--	--		--	--		--	--		--	--		--	--		--	--		--	--
--	--		1739.83	1984.79		--	--		--	--		--	--		--	--		--	--		--	--		--	--		--	--		--	--		--	--
--	--		1831.25	1990.41		--	--		--	--		--	--		--	--		--	--		--	--		--	--		--	--		--	--		--	--
--	--		1971.75	2044.92		--	--		--	--		--	--		--	--		--	--		--	--		--	--		--	--		--	--		--	--
--	--		2105.79	2142.26		--	--		--	--		--	--		--	--		--	--		--	--		--	--		--	--		--	--		--	--
--	--		2225.07	2245.36		--	--		--	--		--	--		--	--		--	--		--	--		--	--		--	--		--	--		--	--
--	--		12.9796	5.95257		--	--		--	--		--	--		--	--		--	--		--	--		--	--		--	--		--	--		--	--
--	--		14.5499	5.99416		--	--		--	--		--	--		--	--		--	--		--	--		--	--		--	--		--	--		--	--
--	--		16.1202	6.02122		--	--		--	--		--	--		--	--		--	--		--	--		--	--		--	--		--	--		--	--
--	--		13.5243	4.74592		--	--		--	--		--	--		--	--		--	--		--	--		--	--		--	--		--	--		--	--
--	--		6.76213	2.25819		--	--		--	--		--	--		--	--		--	--		--	--		--	--		--	--		--	--		--	--
--	--		0	0		--	--		--	--		--	--		--	--		--	--		--	--		--	--		--	--		--	--		--	--
--	--		6.63444	0.0704		--	--		--	--		--	--		--	--		--	--		--	--		--	--		--	--		--	--		--	--
--	--		7.10737	0.14391		--	--		--	--		--	--		--	--		--	--		--	--		--	--		--	--		--	--		--	--
--	--		6.78946	0.18381		--	--		--	--		--	--		--	--		--	--		--	--		--	--		--	--		--	--		--	--
--	--		6.44513	0.18827		--	--		--	--		--	--		--	--		--	--		--	--		--	--		--	--		--	--		--	--
--	--		6.8952	0.19325		--	--		--	--		--	--		--	--		--	--		--	--		--	--		--	--		--	--		--	--
--	--		13.7952	1.61151		--	--		--	--		--	--		--	--		--	--		--	--		--	--		--	--		--	--		--	--
--	--		12.2394	3.05284		--	--		--	--		--	--		--	--		--	--		--	--		--	--		--	--		--	--		--	--
--	--		12.2012	3.81713		--	--		--	--		--	--		--	--		--	--		--	--		--	--		--	--		--	--		--	--
--	--		12.4658	4.0716		--	--		--	--		--	--		--	--		--	--		--	--		--	--		--	--		--	--		--	--
--	--		11.0015	4.35569		--	--		--	--		--	--		--	--		--	--		--	--		--	--		--	--		--	--		--	--
--	--		10.9313	4.55645		--	--		--	--		--	--		--	--		--	--		--	--		--	--		--	--		--	--		--	--
--	--		11.1315	4.63797		--	--		--	--		--	--		--	--		--	--		--	--		--	--		--	--		--	--		--	--
--	--		10.0381	4.64158		--	--		--	--		--	--		--	--		--	--		--	--		--	--		--	--		--	--		--	--
--	--		9.07735	4.63498		--	--		--	--		--	--		--	--		--	--		--	--		--	--		--	--		--	--		--	--
--	--		4.29216	4.62657		--	--		--	--		--	--		--	--		--	--		--	--		--	--		--	--		--	--		--	--
--	--		3.85019	4.74492		--	--		--	--		--	--		--	--		--	--		--	--		--	--		--	--		--	--		--	--
--	--		3.18814	9.91734		--	--		--	--		--	--		--	--		--	--		--	--		--	--		--	--		--	--		--	--
--	--		6.86688	12.1688		--	--		--	--		--	--		--	--		--	--		--	--		--	--		--	--		--	--		--	--
--	--		6.34155	13.2278		--	--		--	--		--	--		--	--		--	--		--	--		--	--		--	--		--	--		--	--
--	--		6.65933	13.7064		--	--		--	--		--	--		--	--		--	--		--	--		--	--		--	--		--	--		--	--
--	--		16.0474	20.8648		--	--		--	--		--	--		--	--		--	--		--	--		--	--		--	--		--	--		--	--
--	--		17.8185	22.3625		--	--		--	--		--	--		--	--		--	--		--	--		--	--		--	--		--	--		--	--
--	--		19.5895	23.8305		--	--		--	--		--	--		--	--		--	--		--	--		--	--		--	--		--	--		--	--
--	--		20.4458	24.0236		--	--		--	--		--	--		--	--		--	--		--	--		--	--		--	--		--	--		--	--
--	--		20.3874	22.9529		--	--		--	--		--	--		--	--		--	--		--	--		--	--		--	--		--	--		--	--
--	--		20.3289	21.9991		--	--		--	--		--	--		--	--		--	--		--	--		--	--		--	--		--	--		--	--
--	--		24.9131	24.093		--	--		--	--		--	--		--	--		--	--		--	--		--	--		--	--		--	--		--	--
--	--		26.0183	26.0314		--	--		--	--		--	--		--	--		--	--		--	--		--	--		--	--		--	--		--	--
--	--		27.8206	27.8778		--	--		--	--		--	--		--	--		--	--		--	--		--	--		--	--		--	--		--	--
--	--		29.6118	29.9222		--	--		--	--		--	--		--	--		--	--		--	--		--	--		--	--		--	--		--	--
--	--		36.0234	31.9445		--	--		--	--		--	--		--	--		--	--		--	--		--	--		--	--		--	--		--	--
--	--		28.7784	32.9171		--	--		--	--		--	--		--	--		--	--		--	--		--	--		--	--		--	--		--	--
--	--		30.1607	33.9616		--	--		--	--		--	--		--	--		--	--		--	--		--	--		--	--		--	--		--	--
--	--		32.2634	34.6502		--	--		--	--		--	--		--	--		--	--		--	--		--	--		--	--		--	--		--	--
--	--		34.5416	35.1412		--	--		--	--		--	--		--	--		--	--		--	--		--	--		--	--		--	--		--	--
--	--		39.7993	35.6703		--	--		--	--		--	--		--	--		--	--		--	--		--	--		--	--		--	--		--	--
--	--		39.5748	36.6909		--	--		--	--		--	--		--	--		--	--		--	--		--	--		--	--		--	--		--	--
--	--		39.1992	37.6365		--	--		--	--		--	--		--	--		--	--		--	--		--	--		--	--		--	--		--	--
--	--		39.1829	38.4135		--	--		--	--		--	--		--	--		--	--		--	--		--	--		--	--		--	--		--	--
--	--		37.3115	39.0526		--	--		--	--		--	--		--	--		--	--		--	--		--	--		--	--		--	--		--	--
--	--		41.1193	39.6256		--	--		--	--		--	--		--	--		--	--		--	--		--	--		--	--		--	--		--	--
--	--		46.2976	41.3559		--	--		--	--		--	--		--	--		--	--		--	--		--	--		--	--		--	--		--	--
--	--		51.2167	42.9866		--	--		--	--		--	--		--	--		--	--		--	--		--	--		--	--		--	--		--	--
--	--		48.168	45.1288		--	--		--	--		--	--		--	--		--	--		--	--		--	--		--	--		--	--		--	--
--	--		45.8743	46.3315		--	--		--	--		--	--		--	--		--	--		--	--		--	--		--	--		--	--		--	--
--	--		40.0425	47.1804		--	--		--	--		--	--		--	--		--	--		--	--		--	--		--	--		--	--		--	--
--	--		0.1012	0.12842		--	--		--	--		--	--		--	--		--	--		--	--		--	--		--	--		--	--		--	--
--	--		0.10958	0.1366		--	--		--	--		--	--		--	--		--	--		--	--		--	--		--	--		--	--		--	--
--	--		0.11797	0.14512		--	--		--	--		--	--		--	--		--	--		--	--		--	--		--	--		--	--		--	--
--	--		0.11776	0.15277		--	--		--	--		--	--		--	--		--	--		--	--		--	--		--	--		--	--		--	--
--	--		0.10894	0.15939		--	--		--	--		--	--		--	--		--	--		--	--		--	--		--	--		--	--		--	--
--	--		0.10012	0.16606		--	--		--	--		--	--		--	--		--	--		--	--		--	--		--	--		--	--		--	--
--	--		0.09406	0.16861		--	--		--	--		--	--		--	--		--	--		--	--		--	--		--	--		--	--		--	--
--	--		0.1072	0.17125		--	--		--	--		--	--		--	--		--	--		--	--		--	--		--	--		--	--		--	--
--	--		0.10806	0.17272		--	--		--	--		--	--		--	--		--	--		--	--		--	--		--	--		--	--		--	--
--	--		0.12007	0.17284		--	--		--	--		--	--		--	--		--	--		--	--		--	--		--	--		--	--		--	--
--	--		0.11714	0.17263		--	--		--	--		--	--		--	--		--	--		--	--		--	--		--	--		--	--		--	--
--	--		0.123	0.17252		--	--		--	--		--	--		--	--		--	--		--	--		--	--		--	--		--	--		--	--
--	--		0.12011	0.17226		--	--		--	--		--	--		--	--		--	--		--	--		--	--		--	--		--	--		--	--
--	--		0.11656	0.17279		--	--		--	--		--	--		--	--		--	--		--	--		--	--		--	--		--	--		--	--
--	--		0.12147	0.17423		--	--		--	--		--	--		--	--		--	--		--	--		--	--		--	--		--	--		--	--
--	--		0.13889	0.17583		--	--		--	--		--	--		--	--		--	--		--	--		--	--		--	--		--	--		--	--
--	--		0.14474	0.16437		--	--		--	--		--	--		--	--		--	--		--	--		--	--		--	--		--	--		--	--
--	--		0.14464	0.15295		--	--		--	--		--	--		--	--		--	--		--	--		--	--		--	--		--	--		--	--
--	--		0.15267	0.1559		--	--		--	--		--	--		--	--		--	--		--	--		--	--		--	--		--	--		--	--
--	--		0.16099	0.17183		--	--		--	--		--	--		--	--		--	--		--	--		--	--		--	--		--	--		--	--
--	--		0.17057	0.18679		--	--		--	--		--	--		--	--		--	--		--	--		--	--		--	--		--	--		--	--
--	--		0.17179	0.18572		--	--		--	--		--	--		--	--		--	--		--	--		--	--		--	--		--	--		--	--
--	--		0.19329	0.18438		--	--		--	--		--	--		--	--		--	--		--	--		--	--		--	--		--	--		--	--
--	--		0.17673	0.18666		--	--		--	--		--	--		--	--		--	--		--	--		--	--		--	--		--	--		--	--
--	--		0.17576	0.19243		--	--		--	--		--	--		--	--		--	--		--	--		--	--		--	--		--	--		--	--
--	--		0.19126	0.1983		--	--		--	--		--	--		--	--		--	--		--	--		--	--		--	--		--	--		--	--
--	--		0	0		--	--		--	--		--	--		--	--		--	--		--	--		--	--		--	--		--	--		--	--
--	--		0	0		--	--		--	--		--	--		--	--		--	--		--	--		--	--		--	--		--	--		--	--
--	--		0	0		--	--		--	--		--	--		--	--		--	--		--	--		--	--		--	--		--	--		--	--
--	--		0	0		--	--		--	--		--	--		--	--		--	--		--	--		--	--		--	--		--	--		--	--
--	--		0	0		--	--		--	--		--	--		--	--		--	--		--	--		--	--		--	--		--	--		--	--
--	--		0	0		--	--		--	--		--	--		--	--		--	--		--	--		--	--		--	--		--	--		--	--
--	--		0	0		--	--		--	--		--	--		--	--		--	--		--	--		--	--		--	--		--	--		--	--
--	--		0	0		--	--		--	--		--	--		--	--		--	--		--	--		--	--		--	--		--	--		--	--
--	--		0	0		--	--		--	--		--	--		--	--		--	--		--	--		--	--		--	--		--	--		--	--
--	--		0	0		--	--		--	--		--	--		--	--		--	--		--	--		--	--		--	--		--	--		--	--
--	--		0	0		--	--		--	--		--	--		--	--		--	--		--	--		--	--		--	--		--	--		--	--
--	--		0	0		--	--		--	--		--	--		--	--		--	--		--	--		--	--		--	--		--	--		--	--
--	--		0	0		--	--		--	--		--	--		--	--		--	--		--	--		--	--		--	--		--	--		--	--
--	--		0	0		--	--		--	--		--	--		--	--		--	--		--	--		--	--		--	--		--	--		--	--
--	--		0	0		--	--		--	--		--	--		--	--		--	--		--	--		--	--		--	--		--	--		--	--
--	--		0	0		--	--		--	--		--	--		--	--		--	--		--	--		--	--		--	--		--	--		--	--
--	--		0	0		--	--		--	--		--	--		--	--		--	--		--	--		--	--		--	--		--	--		--	--
--	--		0	0		--	--		--	--		--	--		--	--		--	--		--	--		--	--		--	--		--	--		--	--
--	--		0	0		--	--		--	--		--	--		--	--		--	--		--	--		--	--		--	--		--	--		--	--
--	--		0	0		--	--		--	--		--	--		--	--		--	--		--	--		--	--		--	--		--	--		--	--
--	--		0	0		--	--		--	--		--	--		--	--		--	--		--	--		--	--		--	--		--	--		--	--
--	--		0	0		--	--		--	--		--	--		--	--		--	--		--	--		--	--		--	--		--	--		--	--
--	--		0	0		--	--		--	--		--	--		--	--		--	--		--	--		--	--		--	--		--	--		--	--
--	--		0	0		--	--		--	--		--	--		--	--		--	--		--	--		--	--		--	--		--	--		--	--
--	--		0	0		--	--		--	--		--	--		--	--		--	--		--	--		--	--		--	--		--	--		--	--
--	--		0	0		--	--		--	--		--	--		--	--		--	--		--	--		--	--		--	--		--	--		--	--
--	--		0.86205	0.42957		--	--		--	--		--	--		--	--		--	--		--	--		--	--		--	--		--	--		--	--
--	--		0.86894	0.43051		--	--		--	--		--	--		--	--		--	--		--	--		--	--		--	--		--	--		--	--
--	--		0.87584	0.43156		--	--		--	--		--	--		--	--		--	--		--	--		--	--		--	--		--	--		--	--
--	--		0.88271	0.45471		--	--		--	--		--	--		--	--		--	--		--	--		--	--		--	--		--	--		--	--
--	--		0.88957	0.49461		--	--		--	--		--	--		--	--		--	--		--	--		--	--		--	--		--	--		--	--
--	--		0.89642	0.53438		--	--		--	--		--	--		--	--		--	--		--	--		--	--		--	--		--	--		--	--
--	--		0.85204	0.52419		--	--		--	--		--	--		--	--		--	--		--	--		--	--		--	--		--	--		--	--
--	--		0.81418	0.86576		--	--		--	--		--	--		--	--		--	--		--	--		--	--		--	--		--	--		--	--
--	--		0.85786	0.85875		--	--		--	--		--	--		--	--		--	--		--	--		--	--		--	--		--	--		--	--
--	--		0.79309	0.85854		--	--		--	--		--	--		--	--		--	--		--	--		--	--		--	--		--	--		--	--
--	--		0.809	0.96034		--	--		--	--		--	--		--	--		--	--		--	--		--	--		--	--		--	--		--	--
--	--		0.90933	1.01336		--	--		--	--		--	--		--	--		--	--		--	--		--	--		--	--		--	--		--	--
--	--		0.98616	1.03728		--	--		--	--		--	--		--	--		--	--		--	--		--	--		--	--		--	--		--	--
--	--		0.96543	1.08805		--	--		--	--		--	--		--	--		--	--		--	--		--	--		--	--		--	--		--	--
--	--		0.99657	1.15801		--	--		--	--		--	--		--	--		--	--		--	--		--	--		--	--		--	--		--	--
--	--		0.95613	1.54449		--	--		--	--		--	--		--	--		--	--		--	--		--	--		--	--		--	--		--	--
--	--		0.94682	1.57781		--	--		--	--		--	--		--	--		--	--		--	--		--	--		--	--		--	--		--	--
--	--		0.99064	1.6013		--	--		--	--		--	--		--	--		--	--		--	--		--	--		--	--		--	--		--	--
--	--		1.03674	1.81872		--	--		--	--		--	--		--	--		--	--		--	--		--	--		--	--		--	--		--	--
--	--		0.99542	1.87653		--	--		--	--		--	--		--	--		--	--		--	--		--	--		--	--		--	--		--	--
--	--		1.09272	1.93332		--	--		--	--		--	--		--	--		--	--		--	--		--	--		--	--		--	--		--	--
--	--		1.09646	1.94213		--	--		--	--		--	--		--	--		--	--		--	--		--	--		--	--		--	--		--	--
--	--		1.24881	1.90455		--	--		--	--		--	--		--	--		--	--		--	--		--	--		--	--		--	--		--	--
--	--		1.34109	1.85598		--	--		--	--		--	--		--	--		--	--		--	--		--	--		--	--		--	--		--	--
--	--		1.47598	1.81884		--	--		--	--		--	--		--	--		--	--		--	--		--	--		--	--		--	--		--	--
--	--		1.64493	2.12594		--	--		--	--		--	--		--	--		--	--		--	--		--	--		--	--		--	--		--	--
--	--		13.4486	12.0889		--	--		--	--		--	--		--	--		--	--		--	--		--	--		--	--		--	--		--	--
--	--		12.7116	12.1287		--	--		--	--		--	--		--	--		--	--		--	--		--	--		--	--		--	--		--	--
--	--		11.9746	12.1876		--	--		--	--		--	--		--	--		--	--		--	--		--	--		--	--		--	--		--	--
--	--		12.1585	12.2198		--	--		--	--		--	--		--	--		--	--		--	--		--	--		--	--		--	--		--	--
--	--		13.2631	12.2446		--	--		--	--		--	--		--	--		--	--		--	--		--	--		--	--		--	--		--	--
--	--		14.3677	12.3095		--	--		--	--		--	--		--	--		--	--		--	--		--	--		--	--		--	--		--	--
--	--		15.3643	12.2243		--	--		--	--		--	--		--	--		--	--		--	--		--	--		--	--		--	--		--	--
--	--		13.8086	12.1161		--	--		--	--		--	--		--	--		--	--		--	--		--	--		--	--		--	--		--	--
--	--		14.7407	12.1549		--	--		--	--		--	--		--	--		--	--		--	--		--	--		--	--		--	--		--	--
--	--		14.4701	12.2829		--	--		--	--		--	--		--	--		--	--		--	--		--	--		--	--		--	--		--	--
--	--		15.4152	12.3978		--	--		--	--		--	--		--	--		--	--		--	--		--	--		--	--		--	--		--	--
--	--		16.3548	13.137		--	--		--	--		--	--		--	--		--	--		--	--		--	--		--	--		--	--		--	--
--	--		17.897	13.9044		--	--		--	--		--	--		--	--		--	--		--	--		--	--		--	--		--	--		--	--
--	--		17.6171	14.9261		--	--		--	--		--	--		--	--		--	--		--	--		--	--		--	--		--	--		--	--
--	--		18.6432	16.2248		--	--		--	--		--	--		--	--		--	--		--	--		--	--		--	--		--	--		--	--
--	--		20.9967	17.5279		--	--		--	--		--	--		--	--		--	--		--	--		--	--		--	--		--	--		--	--
--	--		21.2517	18.184		--	--		--	--		--	--		--	--		--	--		--	--		--	--		--	--		--	--		--	--
--	--		21.8591	18.8533		--	--		--	--		--	--		--	--		--	--		--	--		--	--		--	--		--	--		--	--
--	--		18.5721	19.3779		--	--		--	--		--	--		--	--		--	--		--	--		--	--		--	--		--	--		--	--
--	--		18.8035	19.7222		--	--		--	--		--	--		--	--		--	--		--	--		--	--		--	--		--	--		--	--
--	--		18.6456	20.0679		--	--		--	--		--	--		--	--		--	--		--	--		--	--		--	--		--	--		--	--
--	--		17.5333	21.2096		--	--		--	--		--	--		--	--		--	--		--	--		--	--		--	--		--	--		--	--
--	--		18.0756	21.6446		--	--		--	--		--	--		--	--		--	--		--	--		--	--		--	--		--	--		--	--
--	--		17.6927	21.7649		--	--		--	--		--	--		--	--		--	--		--	--		--	--		--	--		--	--		--	--
--	--		18.4869	22.0534		--	--		--	--		--	--		--	--		--	--		--	--		--	--		--	--		--	--		--	--
--	--		20.1952	21.9852		--	--		--	--		--	--		--	--		--	--		--	--		--	--		--	--		--	--		--	--
--	--		1.66847	2.48888		--	--		--	--		--	--		--	--		--	--		--	--		--	--		--	--		--	--		--	--
--	--		1.93391	2.75363		--	--		--	--		--	--		--	--		--	--		--	--		--	--		--	--		--	--		--	--
--	--		2.19935	2.98386		--	--		--	--		--	--		--	--		--	--		--	--		--	--		--	--		--	--		--	--
--	--		2.4307	3.1053		--	--		--	--		--	--		--	--		--	--		--	--		--	--		--	--		--	--		--	--
--	--		2.62797	3.08864		--	--		--	--		--	--		--	--		--	--		--	--		--	--		--	--		--	--		--	--
--	--		2.82524	3.0228		--	--		--	--		--	--		--	--		--	--		--	--		--	--		--	--		--	--		--	--
--	--		3.06235	3.28665		--	--		--	--		--	--		--	--		--	--		--	--		--	--		--	--		--	--		--	--
--	--		3.03322	3.43756		--	--		--	--		--	--		--	--		--	--		--	--		--	--		--	--		--	--		--	--
--	--		3.30189	3.63875		--	--		--	--		--	--		--	--		--	--		--	--		--	--		--	--		--	--		--	--
--	--		3.7068	3.82383		--	--		--	--		--	--		--	--		--	--		--	--		--	--		--	--		--	--		--	--
--	--		3.96851	4.02908		--	--		--	--		--	--		--	--		--	--		--	--		--	--		--	--		--	--		--	--
--	--		3.92504	4.20204		--	--		--	--		--	--		--	--		--	--		--	--		--	--		--	--		--	--		--	--
--	--		4.78512	4.43294		--	--		--	--		--	--		--	--		--	--		--	--		--	--		--	--		--	--		--	--
--	--		4.49714	4.57771		--	--		--	--		--	--		--	--		--	--		--	--		--	--		--	--		--	--		--	--
--	--		4.95143	4.70099		--	--		--	--		--	--		--	--		--	--		--	--		--	--		--	--		--	--		--	--
--	--		5.2398	4.84362		--	--		--	--		--	--		--	--		--	--		--	--		--	--		--	--		--	--		--	--
--	--		5.38903	5.1727		--	--		--	--		--	--		--	--		--	--		--	--		--	--		--	--		--	--		--	--
--	--		6.09242	5.6036		--	--		--	--		--	--		--	--		--	--		--	--		--	--		--	--		--	--		--	--
--	--		6.06664	5.98089		--	--		--	--		--	--		--	--		--	--		--	--		--	--		--	--		--	--		--	--
--	--		6.55947	6.41513		--	--		--	--		--	--		--	--		--	--		--	--		--	--		--	--		--	--		--	--
--	--		7.12922	6.7497		--	--		--	--		--	--		--	--		--	--		--	--		--	--		--	--		--	--		--	--
--	--		6.64109	7.01375		--	--		--	--		--	--		--	--		--	--		--	--		--	--		--	--		--	--		--	--
--	--		7.74027	7.31707		--	--		--	--		--	--		--	--		--	--		--	--		--	--		--	--		--	--		--	--
--	--		8.5462	7.59839		--	--		--	--		--	--		--	--		--	--		--	--		--	--		--	--		--	--		--	--
--	--		7.76837	7.57097		--	--		--	--		--	--		--	--		--	--		--	--		--	--		--	--		--	--		--	--
--	--		8.26518	7.66098		--	--		--	--		--	--		--	--		--	--		--	--		--	--		--	--		--	--		--	--
--	--		6.50855	8.39781		--	--		--	--		--	--		--	--		--	--		--	--		--	--		--	--		--	--		--	--
--	--		7.59509	9.41158		--	--		--	--		--	--		--	--		--	--		--	--		--	--		--	--		--	--		--	--
--	--		8.68163	10.4623		--	--		--	--		--	--		--	--		--	--		--	--		--	--		--	--		--	--		--	--
--	--		9.29235	11.1434		--	--		--	--		--	--		--	--		--	--		--	--		--	--		--	--		--	--		--	--
--	--		9.42725	11.4038		--	--		--	--		--	--		--	--		--	--		--	--		--	--		--	--		--	--		--	--
--	--		9.56216	11.6383		--	--		--	--		--	--		--	--		--	--		--	--		--	--		--	--		--	--		--	--
--	--		10.1199	12.4921		--	--		--	--		--	--		--	--		--	--		--	--		--	--		--	--		--	--		--	--
--	--		11.3434	13.2226		--	--		--	--		--	--		--	--		--	--		--	--		--	--		--	--		--	--		--	--
--	--		11.4554	13.5946		--	--		--	--		--	--		--	--		--	--		--	--		--	--		--	--		--	--		--	--
--	--		10.3605	13.6587		--	--		--	--		--	--		--	--		--	--		--	--		--	--		--	--		--	--		--	--
--	--		11.5663	13.661		--	--		--	--		--	--		--	--		--	--		--	--		--	--		--	--		--	--		--	--
--	--		12.9038	14.4018		--	--		--	--		--	--		--	--		--	--		--	--		--	--		--	--		--	--		--	--
--	--		13.326	15.1454		--	--		--	--		--	--		--	--		--	--		--	--		--	--		--	--		--	--		--	--
--	--		13.7458	15.3364		--	--		--	--		--	--		--	--		--	--		--	--		--	--		--	--		--	--		--	--
--	--		11.5742	15.0303		--	--		--	--		--	--		--	--		--	--		--	--		--	--		--	--		--	--		--	--
--	--		11.3164	14.4873		--	--		--	--		--	--		--	--		--	--		--	--		--	--		--	--		--	--		--	--
--	--		11.4719	13.1494		--	--		--	--		--	--		--	--		--	--		--	--		--	--		--	--		--	--		--	--
--	--		11.2154	11.4318		--	--		--	--		--	--		--	--		--	--		--	--		--	--		--	--		--	--		--	--
--	--		12.7986	10.7006		--	--		--	--		--	--		--	--		--	--		--	--		--	--		--	--		--	--		--	--
--	--		13.6464	10.4914		--	--		--	--		--	--		--	--		--	--		--	--		--	--		--	--		--	--		--	--
--	--		13.2293	9.78036		--	--		--	--		--	--		--	--		--	--		--	--		--	--		--	--		--	--		--	--
--	--		14.6387	9.98267		--	--		--	--		--	--		--	--		--	--		--	--		--	--		--	--		--	--		--	--
--	--		11.4537	10.5516		--	--		--	--		--	--		--	--		--	--		--	--		--	--		--	--		--	--		--	--
--	--		15.3092	11.4235		--	--		--	--		--	--		--	--		--	--		--	--		--	--		--	--		--	--		--	--
--	--		15.7452	12.3006		--	--		--	--		--	--		--	--		--	--		--	--		--	--		--	--		--	--		--	--
--	--		14.0487	12.8763		--	--		--	--		--	--		--	--		--	--		--	--		--	--		--	--		--	--		--	--
--	--		33.3077	20.7219		--	--		--	--		--	--		--	--		--	--		--	--		--	--		--	--		--	--		--	--
--	--		31.4346	23.3819		--	--		--	--		--	--		--	--		--	--		--	--		--	--		--	--		--	--		--	--
--	--		29.5614	26.4595		--	--		--	--		--	--		--	--		--	--		--	--		--	--		--	--		--	--		--	--
--	--		32.16	28.9529		--	--		--	--		--	--		--	--		--	--		--	--		--	--		--	--		--	--		--	--
--	--		39.2304	30.3587		--	--		--	--		--	--		--	--		--	--		--	--		--	--		--	--		--	--		--	--
--	--		46.3008	31.7143		--	--		--	--		--	--		--	--		--	--		--	--		--	--		--	--		--	--		--	--
--	--		26.9718	31.2439		--	--		--	--		--	--		--	--		--	--		--	--		--	--		--	--		--	--		--	--
--	--		29.1577	30.8536		--	--		--	--		--	--		--	--		--	--		--	--		--	--		--	--		--	--		--	--
--	--		28.6298	31.0928		--	--		--	--		--	--		--	--		--	--		--	--		--	--		--	--		--	--		--	--
--	--		36.0143	31.8502		--	--		--	--		--	--		--	--		--	--		--	--		--	--		--	--		--	--		--	--
--	--		34.8656	32.9034		--	--		--	--		--	--		--	--		--	--		--	--		--	--		--	--		--	--		--	--
--	--		40.4479	33.2546		--	--		--	--		--	--		--	--		--	--		--	--		--	--		--	--		--	--		--	--
--	--		44.4766	33.4389		--	--		--	--		--	--		--	--		--	--		--	--		--	--		--	--		--	--		--	--
--	--		38.3099	33.6391		--	--		--	--		--	--		--	--		--	--		--	--		--	--		--	--		--	--		--	--
--	--		42.6636	34.0139		--	--		--	--		--	--		--	--		--	--		--	--		--	--		--	--		--	--		--	--
--	--		46.746	34.3021		--	--		--	--		--	--		--	--		--	--		--	--		--	--		--	--		--	--		--	--
--	--		37.1073	34.2244		--	--		--	--		--	--		--	--		--	--		--	--		--	--		--	--		--	--		--	--
--	--		25.4914	33.7898		--	--		--	--		--	--		--	--		--	--		--	--		--	--		--	--		--	--		--	--
--	--		25.2516	33.9998		--	--		--	--		--	--		--	--		--	--		--	--		--	--		--	--		--	--		--	--
--	--		20.5791	33.936		--	--		--	--		--	--		--	--		--	--		--	--		--	--		--	--		--	--		--	--
--	--		24.0405	33.9998		--	--		--	--		--	--		--	--		--	--		--	--		--	--		--	--		--	--		--	--
--	--		23.9676	33.7768		--	--		--	--		--	--		--	--		--	--		--	--		--	--		--	--		--	--		--	--
--	--		20.4267	33.376		--	--		--	--		--	--		--	--		--	--		--	--		--	--		--	--		--	--		--	--
--	--		10.9206	33.584		--	--		--	--		--	--		--	--		--	--		--	--		--	--		--	--		--	--		--	--
--	--		12.5076	34.1796		--	--		--	--		--	--		--	--		--	--		--	--		--	--		--	--		--	--		--	--
--	--		10.1245	34.397		--	--		--	--		--	--		--	--		--	--		--	--		--	--		--	--		--	--		--	--
--	--		0.6657	0.59968		--	--		--	--		--	--		--	--		--	--		--	--		--	--		--	--		--	--		--	--
--	--		1.0068	0.72377		--	--		--	--		--	--		--	--		--	--		--	--		--	--		--	--		--	--		--	--
--	--		1.34791	0.81673		--	--		--	--		--	--		--	--		--	--		--	--		--	--		--	--		--	--		--	--
--	--		1.37549	0.86691		--	--		--	--		--	--		--	--		--	--		--	--		--	--		--	--		--	--		--	--
--	--		1.08954	0.89599		--	--		--	--		--	--		--	--		--	--		--	--		--	--		--	--		--	--		--	--
--	--		0.8036	0.93117		--	--		--	--		--	--		--	--		--	--		--	--		--	--		--	--		--	--		--	--
--	--		1.06386	0.96579		--	--		--	--		--	--		--	--		--	--		--	--		--	--		--	--		--	--		--	--
--	--		1.12278	0.97194		--	--		--	--		--	--		--	--		--	--		--	--		--	--		--	--		--	--		--	--
--	--		0.64267	0.93117		--	--		--	--		--	--		--	--		--	--		--	--		--	--		--	--		--	--		--	--
--	--		0.63972	0.90718		--	--		--	--		--	--		--	--		--	--		--	--		--	--		--	--		--	--		--	--
--	--		0.74461	0.90185		--	--		--	--		--	--		--	--		--	--		--	--		--	--		--	--		--	--		--	--
--	--		0.69813	0.89891		--	--		--	--		--	--		--	--		--	--		--	--		--	--		--	--		--	--		--	--
--	--		0.70797	0.91258		--	--		--	--		--	--		--	--		--	--		--	--		--	--		--	--		--	--		--	--
--	--		0.73869	0.9268		--	--		--	--		--	--		--	--		--	--		--	--		--	--		--	--		--	--		--	--
--	--		1.22532	0.94803		--	--		--	--		--	--		--	--		--	--		--	--		--	--		--	--		--	--		--	--
--	--		1.01764	0.96762		--	--		--	--		--	--		--	--		--	--		--	--		--	--		--	--		--	--		--	--
--	--		1.57827	0.98653		--	--		--	--		--	--		--	--		--	--		--	--		--	--		--	--		--	--		--	--
--	--		1.11272	1.01152		--	--		--	--		--	--		--	--		--	--		--	--		--	--		--	--		--	--		--	--
--	--		1.25822	1.03204		--	--		--	--		--	--		--	--		--	--		--	--		--	--		--	--		--	--		--	--
--	--		0.74393	1.03235		--	--		--	--		--	--		--	--		--	--		--	--		--	--		--	--		--	--		--	--
--	--		0.75774	1.02072		--	--		--	--		--	--		--	--		--	--		--	--		--	--		--	--		--	--		--	--
--	--		1.00394	1.00189		--	--		--	--		--	--		--	--		--	--		--	--		--	--		--	--		--	--		--	--
--	--		0.77756	0.99869		--	--		--	--		--	--		--	--		--	--		--	--		--	--		--	--		--	--		--	--
--	--		0.81552	0.98646		--	--		--	--		--	--		--	--		--	--		--	--		--	--		--	--		--	--		--	--
--	--		0.40978	0.9689		--	--		--	--		--	--		--	--		--	--		--	--		--	--		--	--		--	--		--	--
--	--		0.65715	0.97418		--	--		--	--		--	--		--	--		--	--		--	--		--	--		--	--		--	--		--	--
--	--		16.9008	20.7103		--	--		--	--		--	--		--	--		--	--		--	--		--	--		--	--		--	--		--	--
--	--		17.5937	21.46		--	--		--	--		--	--		--	--		--	--		--	--		--	--		--	--		--	--		--	--
--	--		18.2865	22.3211		--	--		--	--		--	--		--	--		--	--		--	--		--	--		--	--		--	--		--	--
--	--		19.5628	23.7032		--	--		--	--		--	--		--	--		--	--		--	--		--	--		--	--		--	--		--	--
--	--		21.4223	25.5978		--	--		--	--		--	--		--	--		--	--		--	--		--	--		--	--		--	--		--	--
--	--		23.2819	27.5303		--	--		--	--		--	--		--	--		--	--		--	--		--	--		--	--		--	--		--	--
--	--		25.2866	29.5391		--	--		--	--		--	--		--	--		--	--		--	--		--	--		--	--		--	--		--	--
--	--		29.6871	31.5348		--	--		--	--		--	--		--	--		--	--		--	--		--	--		--	--		--	--		--	--
--	--		25.4914	33.4224		--	--		--	--		--	--		--	--		--	--		--	--		--	--		--	--		--	--		--	--
--	--		31.0465	34.6517		--	--		--	--		--	--		--	--		--	--		--	--		--	--		--	--		--	--		--	--
--	--		30.4991	36.0075		--	--		--	--		--	--		--	--		--	--		--	--		--	--		--	--		--	--		--	--
--	--		29.0457	37.859		--	--		--	--		--	--		--	--		--	--		--	--		--	--		--	--		--	--		--	--
--	--		33.3987	39.8386		--	--		--	--		--	--		--	--		--	--		--	--		--	--		--	--		--	--		--	--
--	--		30.3861	41.3057		--	--		--	--		--	--		--	--		--	--		--	--		--	--		--	--		--	--		--	--
--	--		34.6259	41.7935		--	--		--	--		--	--		--	--		--	--		--	--		--	--		--	--		--	--		--	--
--	--		37.9613	41.9409		--	--		--	--		--	--		--	--		--	--		--	--		--	--		--	--		--	--		--	--
--	--		34.4482	39.3599		--	--		--	--		--	--		--	--		--	--		--	--		--	--		--	--		--	--		--	--
--	--		43.1212	37.0451		--	--		--	--		--	--		--	--		--	--		--	--		--	--		--	--		--	--		--	--
--	--		49.2081	35.8149		--	--		--	--		--	--		--	--		--	--		--	--		--	--		--	--		--	--		--	--
--	--		43.4189	35.1595		--	--		--	--		--	--		--	--		--	--		--	--		--	--		--	--		--	--		--	--
--	--		48.2419	34.6227		--	--		--	--		--	--		--	--		--	--		--	--		--	--		--	--		--	--		--	--
--	--		40.7985	33.9884		--	--		--	--		--	--		--	--		--	--		--	--		--	--		--	--		--	--		--	--
--	--		41.4237	33.4395		--	--		--	--		--	--		--	--		--	--		--	--		--	--		--	--		--	--		--	--
--	--		43.9557	33.1209		--	--		--	--		--	--		--	--		--	--		--	--		--	--		--	--		--	--		--	--
--	--		43.7471	32.8952		--	--		--	--		--	--		--	--		--	--		--	--		--	--		--	--		--	--		--	--
--	--		42.1878	32.5967		--	--		--	--		--	--		--	--		--	--		--	--		--	--		--	--		--	--		--	--
--	--		2.57545	2.91135		--	--		--	--		--	--		--	--		--	--		--	--		--	--		--	--		--	--		--	--
--	--		2.60449	3.04523		--	--		--	--		--	--		--	--		--	--		--	--		--	--		--	--		--	--		--	--
--	--		2.63353	3.18614		--	--		--	--		--	--		--	--		--	--		--	--		--	--		--	--		--	--		--	--
--	--		2.69314	3.33908		--	--		--	--		--	--		--	--		--	--		--	--		--	--		--	--		--	--		--	--
--	--		2.78331	3.50289		--	--		--	--		--	--		--	--		--	--		--	--		--	--		--	--		--	--		--	--
--	--		2.87348	3.66921		--	--		--	--		--	--		--	--		--	--		--	--		--	--		--	--		--	--		--	--
--	--		3.21402	3.61356		--	--		--	--		--	--		--	--		--	--		--	--		--	--		--	--		--	--		--	--
--	--		2.8139	3.56158		--	--		--	--		--	--		--	--		--	--		--	--		--	--		--	--		--	--		--	--
--	--		2.87329	3.54824		--	--		--	--		--	--		--	--		--	--		--	--		--	--		--	--		--	--		--	--
--	--		3.39568	3.5877		--	--		--	--		--	--		--	--		--	--		--	--		--	--		--	--		--	--		--	--
--	--		3.09342	3.63458		--	--		--	--		--	--		--	--		--	--		--	--		--	--		--	--		--	--		--	--
--	--		3.10703	3.91797		--	--		--	--		--	--		--	--		--	--		--	--		--	--		--	--		--	--		--	--
--	--		4.47252	4.18169		--	--		--	--		--	--		--	--		--	--		--	--		--	--		--	--		--	--		--	--
--	--		4.36502	4.45145		--	--		--	--		--	--		--	--		--	--		--	--		--	--		--	--		--	--		--	--
--	--		4.47651	4.63027		--	--		--	--		--	--		--	--		--	--		--	--		--	--		--	--		--	--		--	--
--	--		4.87029	4.79025		--	--		--	--		--	--		--	--		--	--		--	--		--	--		--	--		--	--		--	--
--	--		5.1557	5.7905		--	--		--	--		--	--		--	--		--	--		--	--		--	--		--	--		--	--		--	--
--	--		6.29656	6.83338		--	--		--	--		--	--		--	--		--	--		--	--		--	--		--	--		--	--		--	--
--	--		8.12972	7.73921		--	--		--	--		--	--		--	--		--	--		--	--		--	--		--	--		--	--		--	--
--	--		8.45165	8.36296		--	--		--	--		--	--		--	--		--	--		--	--		--	--		--	--		--	--		--	--
--	--		9.39216	8.91557		--	--		--	--		--	--		--	--		--	--		--	--		--	--		--	--		--	--		--	--
--	--		10.3471	9.02732		--	--		--	--		--	--		--	--		--	--		--	--		--	--		--	--		--	--		--	--
--	--		10.9256	8.97398		--	--		--	--		--	--		--	--		--	--		--	--		--	--		--	--		--	--		--	--
--	--		7.8994	10.1289		--	--		--	--		--	--		--	--		--	--		--	--		--	--		--	--		--	--		--	--
--	--		10.0921	12.4548		--	--		--	--		--	--		--	--		--	--		--	--		--	--		--	--		--	--		--	--
--	--		10.7416	14.919		--	--		--	--		--	--		--	--		--	--		--	--		--	--		--	--		--	--		--	--
--	--		20.0307	27.8995		--	--		--	--		--	--		--	--		--	--		--	--		--	--		--	--		--	--		--	--
--	--		24.047	31.7433		--	--		--	--		--	--		--	--		--	--		--	--		--	--		--	--		--	--		--	--
--	--		28.0633	35.0131		--	--		--	--		--	--		--	--		--	--		--	--		--	--		--	--		--	--		--	--
--	--		30.6194	36.7667		--	--		--	--		--	--		--	--		--	--		--	--		--	--		--	--		--	--		--	--
--	--		31.7152	37.2712		--	--		--	--		--	--		--	--		--	--		--	--		--	--		--	--		--	--		--	--
--	--		32.811	37.6494		--	--		--	--		--	--		--	--		--	--		--	--		--	--		--	--		--	--		--	--
--	--		33.4537	37.7357		--	--		--	--		--	--		--	--		--	--		--	--		--	--		--	--		--	--		--	--
--	--		34.7944	37.8529		--	--		--	--		--	--		--	--		--	--		--	--		--	--		--	--		--	--		--	--
--	--		30.4559	37.9425		--	--		--	--		--	--		--	--		--	--		--	--		--	--		--	--		--	--		--	--
--	--		34.2412	38.2723		--	--		--	--		--	--		--	--		--	--		--	--		--	--		--	--		--	--		--	--
--	--		33.1126	38.4134		--	--		--	--		--	--		--	--		--	--		--	--		--	--		--	--		--	--		--	--
--	--		49.6957	43.302		--	--		--	--		--	--		--	--		--	--		--	--		--	--		--	--		--	--		--	--
--	--		53.4501	47.3959		--	--		--	--		--	--		--	--		--	--		--	--		--	--		--	--		--	--		--	--
--	--		53.7011	49.6973		--	--		--	--		--	--		--	--		--	--		--	--		--	--		--	--		--	--		--	--
--	--		52.7996	50.6108		--	--		--	--		--	--		--	--		--	--		--	--		--	--		--	--		--	--		--	--
--	--		62.4207	51.5608		--	--		--	--		--	--		--	--		--	--		--	--		--	--		--	--		--	--		--	--
--	--		45.8201	50.5952		--	--		--	--		--	--		--	--		--	--		--	--		--	--		--	--		--	--		--	--
--	--		49.1873	49.5953		--	--		--	--		--	--		--	--		--	--		--	--		--	--		--	--		--	--		--	--
--	--		49.8163	49.0014		--	--		--	--		--	--		--	--		--	--		--	--		--	--		--	--		--	--		--	--
--	--		52.7951	48.7299		--	--		--	--		--	--		--	--		--	--		--	--		--	--		--	--		--	--		--	--
--	--		50.3025	48.2993		--	--		--	--		--	--		--	--		--	--		--	--		--	--		--	--		--	--		--	--
--	--		47.2482	47.6182		--	--		--	--		--	--		--	--		--	--		--	--		--	--		--	--		--	--		--	--
--	--		46.5353	46.9364		--	--		--	--		--	--		--	--		--	--		--	--		--	--		--	--		--	--		--	--
--	--		53.7383	46.7971		--	--		--	--		--	--		--	--		--	--		--	--		--	--		--	--		--	--		--	--
--	--		51.8251	46.7933		--	--		--	--		--	--		--	--		--	--		--	--		--	--		--	--		--	--		--	--
--	--		55.7448	46.4767		--	--		--	--		--	--		--	--		--	--		--	--		--	--		--	--		--	--		--	--
--	--		0	0		--	--		--	--		--	--		--	--		--	--		--	--		--	--		--	--		--	--		--	--
--	--		0	0		--	--		--	--		--	--		--	--		--	--		--	--		--	--		--	--		--	--		--	--
--	--		0	0		--	--		--	--		--	--		--	--		--	--		--	--		--	--		--	--		--	--		--	--
--	--		0.00964	0.00571		--	--		--	--		--	--		--	--		--	--		--	--		--	--		--	--		--	--		--	--
--	--		0.02893	0.0231		--	--		--	--		--	--		--	--		--	--		--	--		--	--		--	--		--	--		--	--
--	--		0.04822	0.04561		--	--		--	--		--	--		--	--		--	--		--	--		--	--		--	--		--	--		--	--
--	--		0.04604	0.04565		--	--		--	--		--	--		--	--		--	--		--	--		--	--		--	--		--	--		--	--
--	--		0.04541	0.04565		--	--		--	--		--	--		--	--		--	--		--	--		--	--		--	--		--	--		--	--
--	--		0.04976	0.04775		--	--		--	--		--	--		--	--		--	--		--	--		--	--		--	--		--	--		--	--
--	--		0.05563	0.05086		--	--		--	--		--	--		--	--		--	--		--	--		--	--		--	--		--	--		--	--
--	--		0.03714	0.05062		--	--		--	--		--	--		--	--		--	--		--	--		--	--		--	--		--	--		--	--
--	--		0.04974	0.05224		--	--		--	--		--	--		--	--		--	--		--	--		--	--		--	--		--	--		--	--
--	--		0.05472	0.05481		--	--		--	--		--	--		--	--		--	--		--	--		--	--		--	--		--	--		--	--
--	--		0.06242	0.0584		--	--		--	--		--	--		--	--		--	--		--	--		--	--		--	--		--	--		--	--
--	--		0.07795	0.06228		--	--		--	--		--	--		--	--		--	--		--	--		--	--		--	--		--	--		--	--
--	--		0.06866	0.0655		--	--		--	--		--	--		--	--		--	--		--	--		--	--		--	--		--	--		--	--
--	--		0.06218	0.06764		--	--		--	--		--	--		--	--		--	--		--	--		--	--		--	--		--	--		--	--
--	--		0.05882	0.06943		--	--		--	--		--	--		--	--		--	--		--	--		--	--		--	--		--	--		--	--
--	--		0.06286	0.06967		--	--		--	--		--	--		--	--		--	--		--	--		--	--		--	--		--	--		--	--
--	--		0.05546	0.06976		--	--		--	--		--	--		--	--		--	--		--	--		--	--		--	--		--	--		--	--
--	--		0.05417	0.06996		--	--		--	--		--	--		--	--		--	--		--	--		--	--		--	--		--	--		--	--
--	--		0.04819	0.06919		--	--		--	--		--	--		--	--		--	--		--	--		--	--		--	--		--	--		--	--
--	--		0.04798	0.06767		--	--		--	--		--	--		--	--		--	--		--	--		--	--		--	--		--	--		--	--
--	--		0.04606	0.06708		--	--		--	--		--	--		--	--		--	--		--	--		--	--		--	--		--	--		--	--
--	--		0.04293	0.06691		--	--		--	--		--	--		--	--		--	--		--	--		--	--		--	--		--	--		--	--
--	--		0.04698	0.06591		--	--		--	--		--	--		--	--		--	--		--	--		--	--		--	--		--	--		--	--
--	--		6.28035	4.93256		--	--		--	--		--	--		--	--		--	--		--	--		--	--		--	--		--	--		--	--
--	--		5.8186	5.06463		--	--		--	--		--	--		--	--		--	--		--	--		--	--		--	--		--	--		--	--
--	--		5.35685	5.20018		--	--		--	--		--	--		--	--		--	--		--	--		--	--		--	--		--	--		--	--
--	--		5.48787	5.3597		--	--		--	--		--	--		--	--		--	--		--	--		--	--		--	--		--	--		--	--
--	--		6.21166	5.56874		--	--		--	--		--	--		--	--		--	--		--	--		--	--		--	--		--	--		--	--
--	--		6.93544	5.81769		--	--		--	--		--	--		--	--		--	--		--	--		--	--		--	--		--	--		--	--
--	--		7.68466	5.92705		--	--		--	--		--	--		--	--		--	--		--	--		--	--		--	--		--	--		--	--
--	--		7.51124	6.04823		--	--		--	--		--	--		--	--		--	--		--	--		--	--		--	--		--	--		--	--
--	--		7.8459	6.32948		--	--		--	--		--	--		--	--		--	--		--	--		--	--		--	--		--	--		--	--
--	--		7.99519	6.67908		--	--		--	--		--	--		--	--		--	--		--	--		--	--		--	--		--	--		--	--
--	--		7.28752	7.05123		--	--		--	--		--	--		--	--		--	--		--	--		--	--		--	--		--	--		--	--
--	--		8.92985	7.06393		--	--		--	--		--	--		--	--		--	--		--	--		--	--		--	--		--	--		--	--
--	--		9.0514	7.08392		--	--		--	--		--	--		--	--		--	--		--	--		--	--		--	--		--	--		--	--
--	--		7.15427	7.20447		--	--		--	--		--	--		--	--		--	--		--	--		--	--		--	--		--	--		--	--
--	--		7.80048	7.3974		--	--		--	--		--	--		--	--		--	--		--	--		--	--		--	--		--	--		--	--
--	--		6.54573	7.58887		--	--		--	--		--	--		--	--		--	--		--	--		--	--		--	--		--	--		--	--
--	--		6.83034	7.77748		--	--		--	--		--	--		--	--		--	--		--	--		--	--		--	--		--	--		--	--
--	--		6.23358	7.95691		--	--		--	--		--	--		--	--		--	--		--	--		--	--		--	--		--	--		--	--
--	--		6.48245	8.08635		--	--		--	--		--	--		--	--		--	--		--	--		--	--		--	--		--	--		--	--
--	--		5.99686	8.17468		--	--		--	--		--	--		--	--		--	--		--	--		--	--		--	--		--	--		--	--
--	--		5.76313	8.21064		--	--		--	--		--	--		--	--		--	--		--	--		--	--		--	--		--	--		--	--
--	--		6.5857	8.22315		--	--		--	--		--	--		--	--		--	--		--	--		--	--		--	--		--	--		--	--
--	--		6.76807	8.30966		--	--		--	--		--	--		--	--		--	--		--	--		--	--		--	--		--	--		--	--
--	--		6.41733	8.50287		--	--		--	--		--	--		--	--		--	--		--	--		--	--		--	--		--	--		--	--
--	--		6.13791	8.75657		--	--		--	--		--	--		--	--		--	--		--	--		--	--		--	--		--	--		--	--
--	--		6.63102	8.97562		--	--		--	--		--	--		--	--		--	--		--	--		--	--		--	--		--	--		--	--
--	--		6.8477	7.21863		--	--		--	--		--	--		--	--		--	--		--	--		--	--		--	--		--	--		--	--
--	--		8.49403	8.06856		--	--		--	--		--	--		--	--		--	--		--	--		--	--		--	--		--	--		--	--
--	--		10.1403	8.78959		--	--		--	--		--	--		--	--		--	--		--	--		--	--		--	--		--	--		--	--
--	--		10.3777	9.42259		--	--		--	--		--	--		--	--		--	--		--	--		--	--		--	--		--	--		--	--
--	--		9.20611	10.0491		--	--		--	--		--	--		--	--		--	--		--	--		--	--		--	--		--	--		--	--
--	--		8.0345	10.6928		--	--		--	--		--	--		--	--		--	--		--	--		--	--		--	--		--	--		--	--
--	--		8.16124	10.8069		--	--		--	--		--	--		--	--		--	--		--	--		--	--		--	--		--	--		--	--
--	--		8.36499	10.9582		--	--		--	--		--	--		--	--		--	--		--	--		--	--		--	--		--	--		--	--
--	--		7.99016	11.0753		--	--		--	--		--	--		--	--		--	--		--	--		--	--		--	--		--	--		--	--
--	--		7.30254	11.2163		--	--		--	--		--	--		--	--		--	--		--	--		--	--		--	--		--	--		--	--
--	--		9.71387	11.3435		--	--		--	--		--	--		--	--		--	--		--	--		--	--		--	--		--	--		--	--
--	--		8.17725	11.4377		--	--		--	--		--	--		--	--		--	--		--	--		--	--		--	--		--	--		--	--
--	--		8.49045	11.4667		--	--		--	--		--	--		--	--		--	--		--	--		--	--		--	--		--	--		--	--
--	--		10.8307	11.7312		--	--		--	--		--	--		--	--		--	--		--	--		--	--		--	--		--	--		--	--
--	--		11.6644	12.1877		--	--		--	--		--	--		--	--		--	--		--	--		--	--		--	--		--	--		--	--
--	--		13.0409	12.614		--	--		--	--		--	--		--	--		--	--		--	--		--	--		--	--		--	--		--	--
--	--		14.6274	12.9486		--	--		--	--		--	--		--	--		--	--		--	--		--	--		--	--		--	--		--	--
--	--		17.0657	13.3317		--	--		--	--		--	--		--	--		--	--		--	--		--	--		--	--		--	--		--	--
--	--		15.9643	13.5084		--	--		--	--		--	--		--	--		--	--		--	--		--	--		--	--		--	--		--	--
--	--		15.3292	13.7114		--	--		--	--		--	--		--	--		--	--		--	--		--	--		--	--		--	--		--	--
--	--		16.6165	13.8646		--	--		--	--		--	--		--	--		--	--		--	--		--	--		--	--		--	--		--	--
--	--		18.7851	14.6744		--	--		--	--		--	--		--	--		--	--		--	--		--	--		--	--		--	--		--	--
--	--		21.0067	15.0781		--	--		--	--		--	--		--	--		--	--		--	--		--	--		--	--		--	--		--	--
--	--		19.4624	15.6357		--	--		--	--		--	--		--	--		--	--		--	--		--	--		--	--		--	--		--	--
--	--		21.8672	16.2546		--	--		--	--		--	--		--	--		--	--		--	--		--	--		--	--		--	--		--	--
--	--		23.8677	16.9386		--	--		--	--		--	--		--	--		--	--		--	--		--	--		--	--		--	--		--	--
--	--		3.71427	3.52474		--	--		--	--		--	--		--	--		--	--		--	--		--	--		--	--		--	--		--	--
--	--		4.35617	3.74437		--	--		--	--		--	--		--	--		--	--		--	--		--	--		--	--		--	--		--	--
--	--		4.99806	3.93697		--	--		--	--		--	--		--	--		--	--		--	--		--	--		--	--		--	--		--	--
--	--		5.28664	3.97795		--	--		--	--		--	--		--	--		--	--		--	--		--	--		--	--		--	--		--	--
--	--		5.22189	3.90299		--	--		--	--		--	--		--	--		--	--		--	--		--	--		--	--		--	--		--	--
--	--		5.15715	3.85743		--	--		--	--		--	--		--	--		--	--		--	--		--	--		--	--		--	--		--	--
--	--		5.81569	4.31484		--	--		--	--		--	--		--	--		--	--		--	--		--	--		--	--		--	--		--	--
--	--		6.5329	4.93083		--	--		--	--		--	--		--	--		--	--		--	--		--	--		--	--		--	--		--	--
--	--		5.88825	5.2782		--	--		--	--		--	--		--	--		--	--		--	--		--	--		--	--		--	--		--	--
--	--		7.32045	5.72503		--	--		--	--		--	--		--	--		--	--		--	--		--	--		--	--		--	--		--	--
--	--		6.83356	6.0239		--	--		--	--		--	--		--	--		--	--		--	--		--	--		--	--		--	--		--	--
--	--		5.48597	6.29755		--	--		--	--		--	--		--	--		--	--		--	--		--	--		--	--		--	--		--	--
--	--		6.46642	6.57304		--	--		--	--		--	--		--	--		--	--		--	--		--	--		--	--		--	--		--	--
--	--		5.56728	6.75458		--	--		--	--		--	--		--	--		--	--		--	--		--	--		--	--		--	--		--	--
--	--		5.73918	6.93327		--	--		--	--		--	--		--	--		--	--		--	--		--	--		--	--		--	--		--	--
--	--		5.95693	6.94724		--	--		--	--		--	--		--	--		--	--		--	--		--	--		--	--		--	--		--	--
--	--		7.2126	7.38995		--	--		--	--		--	--		--	--		--	--		--	--		--	--		--	--		--	--		--	--
--	--		5.71814	7.77224		--	--		--	--		--	--		--	--		--	--		--	--		--	--		--	--		--	--		--	--
--	--		6.81494	8.14997		--	--		--	--		--	--		--	--		--	--		--	--		--	--		--	--		--	--		--	--
--	--		6.67229	8.2962		--	--		--	--		--	--		--	--		--	--		--	--		--	--		--	--		--	--		--	--
--	--		6.36728	8.43177		--	--		--	--		--	--		--	--		--	--		--	--		--	--		--	--		--	--		--	--
--	--		6.10965	8.37905		--	--		--	--		--	--		--	--		--	--		--	--		--	--		--	--		--	--		--	--
--	--		6.89576	8.35752		--	--		--	--		--	--		--	--		--	--		--	--		--	--		--	--		--	--		--	--
--	--		6.80773	8.44318		--	--		--	--		--	--		--	--		--	--		--	--		--	--		--	--		--	--		--	--
--	--		7.1049	8.40857		--	--		--	--		--	--		--	--		--	--		--	--		--	--		--	--		--	--		--	--
--	--		6.49642	8.4237		--	--		--	--		--	--		--	--		--	--		--	--		--	--		--	--		--	--		--	--
--	--		0	0		--	--		--	--		--	--		--	--		--	--		--	--		--	--		--	--		--	--		--	--
--	--		0	0		--	--		--	--		--	--		--	--		--	--		--	--		--	--		--	--		--	--		--	--
--	--		0	0		--	--		--	--		--	--		--	--		--	--		--	--		--	--		--	--		--	--		--	--
--	--		0.05049	0.01858		--	--		--	--		--	--		--	--		--	--		--	--		--	--		--	--		--	--		--	--
--	--		0.15146	0.06331		--	--		--	--		--	--		--	--		--	--		--	--		--	--		--	--		--	--		--	--
--	--		0.25244	0.11596		--	--		--	--		--	--		--	--		--	--		--	--		--	--		--	--		--	--		--	--
--	--		0.20404	0.10992		--	--		--	--		--	--		--	--		--	--		--	--		--	--		--	--		--	--		--	--
--	--		0.18792	0.10451		--	--		--	--		--	--		--	--		--	--		--	--		--	--		--	--		--	--		--	--
--	--		0.18084	0.10165		--	--		--	--		--	--		--	--		--	--		--	--		--	--		--	--		--	--		--	--
--	--		0.18817	0.10087		--	--		--	--		--	--		--	--		--	--		--	--		--	--		--	--		--	--		--	--
--	--		0.19801	0.10036		--	--		--	--		--	--		--	--		--	--		--	--		--	--		--	--		--	--		--	--
--	--		0.20004	0.10219		--	--		--	--		--	--		--	--		--	--		--	--		--	--		--	--		--	--		--	--
--	--		0.2218	0.10412		--	--		--	--		--	--		--	--		--	--		--	--		--	--		--	--		--	--		--	--
--	--		0.20517	0.10723		--	--		--	--		--	--		--	--		--	--		--	--		--	--		--	--		--	--		--	--
--	--		0.20959	0.11147		--	--		--	--		--	--		--	--		--	--		--	--		--	--		--	--		--	--		--	--
--	--		0.21747	0.11572		--	--		--	--		--	--		--	--		--	--		--	--		--	--		--	--		--	--		--	--
--	--		0.20536	0.11816		--	--		--	--		--	--		--	--		--	--		--	--		--	--		--	--		--	--		--	--
--	--		0.1994	0.12061		--	--		--	--		--	--		--	--		--	--		--	--		--	--		--	--		--	--		--	--
--	--		0.19738	0.12248		--	--		--	--		--	--		--	--		--	--		--	--		--	--		--	--		--	--		--	--
--	--		0.18084	0.12378		--	--		--	--		--	--		--	--		--	--		--	--		--	--		--	--		--	--		--	--
--	--		0.19504	0.12511		--	--		--	--		--	--		--	--		--	--		--	--		--	--		--	--		--	--		--	--
--	--		0.19033	0.1256		--	--		--	--		--	--		--	--		--	--		--	--		--	--		--	--		--	--		--	--
--	--		0.1987	0.12606		--	--		--	--		--	--		--	--		--	--		--	--		--	--		--	--		--	--		--	--
--	--		0.19699	0.12644		--	--		--	--		--	--		--	--		--	--		--	--		--	--		--	--		--	--		--	--
--	--		0.20799	0.12672		--	--		--	--		--	--		--	--		--	--		--	--		--	--		--	--		--	--		--	--
--	--		0.2325	0.12701		--	--		--	--		--	--		--	--		--	--		--	--		--	--		--	--		--	--		--	--
--	--		17.3908	19.9133		--	--		--	--		--	--		--	--		--	--		--	--		--	--		--	--		--	--		--	--
--	--		18.418	20.8382		--	--		--	--		--	--		--	--		--	--		--	--		--	--		--	--		--	--		--	--
--	--		19.4453	21.7742		--	--		--	--		--	--		--	--		--	--		--	--		--	--		--	--		--	--		--	--
--	--		19.9121	22.2534		--	--		--	--		--	--		--	--		--	--		--	--		--	--		--	--		--	--		--	--
--	--		19.8187	22.2818		--	--		--	--		--	--		--	--		--	--		--	--		--	--		--	--		--	--		--	--
--	--		19.7252	22.3293		--	--		--	--		--	--		--	--		--	--		--	--		--	--		--	--		--	--		--	--
--	--		20.3219	22.6568		--	--		--	--		--	--		--	--		--	--		--	--		--	--		--	--		--	--		--	--
--	--		17.9115	22.9881		--	--		--	--		--	--		--	--		--	--		--	--		--	--		--	--		--	--		--	--
--	--		18.4941	23.6172		--	--		--	--		--	--		--	--		--	--		--	--		--	--		--	--		--	--		--	--
--	--		17.1438	24.4747		--	--		--	--		--	--		--	--		--	--		--	--		--	--		--	--		--	--		--	--
--	--		25.7267	25.2617		--	--		--	--		--	--		--	--		--	--		--	--		--	--		--	--		--	--		--	--
--	--		23.7246	25.7071		--	--		--	--		--	--		--	--		--	--		--	--		--	--		--	--		--	--		--	--
--	--		24.6365	26.1483		--	--		--	--		--	--		--	--		--	--		--	--		--	--		--	--		--	--		--	--
--	--		19.7697	26.4617		--	--		--	--		--	--		--	--		--	--		--	--		--	--		--	--		--	--		--	--
--	--		23	26.6995		--	--		--	--		--	--		--	--		--	--		--	--		--	--		--	--		--	--		--	--
--	--		26.5044	26.9299		--	--		--	--		--	--		--	--		--	--		--	--		--	--		--	--		--	--		--	--
--	--		21.876	27.6317		--	--		--	--		--	--		--	--		--	--		--	--		--	--		--	--		--	--		--	--
--	--		21.5877	28.3075		--	--		--	--		--	--		--	--		--	--		--	--		--	--		--	--		--	--		--	--
--	--		34.6448	29.3442		--	--		--	--		--	--		--	--		--	--		--	--		--	--		--	--		--	--		--	--
--	--		28.9027	30.5697		--	--		--	--		--	--		--	--		--	--		--	--		--	--		--	--		--	--		--	--
--	--		34.3536	31.7114		--	--		--	--		--	--		--	--		--	--		--	--		--	--		--	--		--	--		--	--
--	--		38.0664	34.443		--	--		--	--		--	--		--	--		--	--		--	--		--	--		--	--		--	--		--	--
--	--		44.4612	36.8652		--	--		--	--		--	--		--	--		--	--		--	--		--	--		--	--		--	--		--	--
--	--		49.761	39.4476		--	--		--	--		--	--		--	--		--	--		--	--		--	--		--	--		--	--		--	--
--	--		55.1423	42.4753		--	--		--	--		--	--		--	--		--	--		--	--		--	--		--	--		--	--		--	--
--	--		66.212	45.9277		--	--		--	--		--	--		--	--		--	--		--	--		--	--		--	--		--	--		--	--
--	--		0.38312	0.15154		--	--		--	--		--	--		--	--		--	--		--	--		--	--		--	--		--	--		--	--
--	--		0.40098	0.15438		--	--		--	--		--	--		--	--		--	--		--	--		--	--		--	--		--	--		--	--
--	--		0.41885	0.15772		--	--		--	--		--	--		--	--		--	--		--	--		--	--		--	--		--	--		--	--
--	--		0.43717	0.14764		--	--		--	--		--	--		--	--		--	--		--	--		--	--		--	--		--	--		--	--
--	--		0.45593	0.12308		--	--		--	--		--	--		--	--		--	--		--	--		--	--		--	--		--	--		--	--
--	--		0.4747	0.10065		--	--		--	--		--	--		--	--		--	--		--	--		--	--		--	--		--	--		--	--
--	--		0.47185	0.10127		--	--		--	--		--	--		--	--		--	--		--	--		--	--		--	--		--	--		--	--
--	--		0.43683	0.10163		--	--		--	--		--	--		--	--		--	--		--	--		--	--		--	--		--	--		--	--
--	--		0.49307	0.10186		--	--		--	--		--	--		--	--		--	--		--	--		--	--		--	--		--	--		--	--
--	--		0.39588	0.10201		--	--		--	--		--	--		--	--		--	--		--	--		--	--		--	--		--	--		--	--
--	--		0.61392	0.10211		--	--		--	--		--	--		--	--		--	--		--	--		--	--		--	--		--	--		--	--
--	--		0.55678	0.10218		--	--		--	--		--	--		--	--		--	--		--	--		--	--		--	--		--	--		--	--
--	--		0.56795	0.10223		--	--		--	--		--	--		--	--		--	--		--	--		--	--		--	--		--	--		--	--
--	--		0.44023	0.10232		--	--		--	--		--	--		--	--		--	--		--	--		--	--		--	--		--	--		--	--
--	--		0.43536	0.10236		--	--		--	--		--	--		--	--		--	--		--	--		--	--		--	--		--	--		--	--
--	--		0.4945	0.10242		--	--		--	--		--	--		--	--		--	--		--	--		--	--		--	--		--	--		--	--
--	--		0.37345	0.10248		--	--		--	--		--	--		--	--		--	--		--	--		--	--		--	--		--	--		--	--
--	--		0.9556	0.10615		--	--		--	--		--	--		--	--		--	--		--	--		--	--		--	--		--	--		--	--
--	--		0.41171	0.12867		--	--		--	--		--	--		--	--		--	--		--	--		--	--		--	--		--	--		--	--
--	--		1.58924	0.15905		--	--		--	--		--	--		--	--		--	--		--	--		--	--		--	--		--	--		--	--
--	--		0.5677	0.2704		--	--		--	--		--	--		--	--		--	--		--	--		--	--		--	--		--	--		--	--
--	--		0.30601	0.25425		--	--		--	--		--	--		--	--		--	--		--	--		--	--		--	--		--	--		--	--
--	--		0.52594	0.20826		--	--		--	--		--	--		--	--		--	--		--	--		--	--		--	--		--	--		--	--
--	--		1.28528	0.17118		--	--		--	--		--	--		--	--		--	--		--	--		--	--		--	--		--	--		--	--
--	--		0.45115	0.16813		--	--		--	--		--	--		--	--		--	--		--	--		--	--		--	--		--	--		--	--
--	--		0.85971	0.16147		--	--		--	--		--	--		--	--		--	--		--	--		--	--		--	--		--	--		--	--
--	--		1.2903	2.1357		--	--		--	--		--	--		--	--		--	--		--	--		--	--		--	--		--	--		--	--
--	--		1.46201	2.37425		--	--		--	--		--	--		--	--		--	--		--	--		--	--		--	--		--	--		--	--
--	--		1.63372	2.60673		--	--		--	--		--	--		--	--		--	--		--	--		--	--		--	--		--	--		--	--
--	--		1.80202	2.8285		--	--		--	--		--	--		--	--		--	--		--	--		--	--		--	--		--	--		--	--
--	--		1.9669	3.01186		--	--		--	--		--	--		--	--		--	--		--	--		--	--		--	--		--	--		--	--
--	--		2.13179	3.15841		--	--		--	--		--	--		--	--		--	--		--	--		--	--		--	--		--	--		--	--
--	--		1.69393	3.21062		--	--		--	--		--	--		--	--		--	--		--	--		--	--		--	--		--	--		--	--
--	--		2.15221	3.26168		--	--		--	--		--	--		--	--		--	--		--	--		--	--		--	--		--	--		--	--
--	--		2.41288	3.31535		--	--		--	--		--	--		--	--		--	--		--	--		--	--		--	--		--	--		--	--
--	--		2.37204	3.35813		--	--		--	--		--	--		--	--		--	--		--	--		--	--		--	--		--	--		--	--
--	--		1.79534	3.38743		--	--		--	--		--	--		--	--		--	--		--	--		--	--		--	--		--	--		--	--
--	--		1.90149	3.41564		--	--		--	--		--	--		--	--		--	--		--	--		--	--		--	--		--	--		--	--
--	--		1.80716	3.44835		--	--		--	--		--	--		--	--		--	--		--	--		--	--		--	--		--	--		--	--
--	--		2.14786	3.61865		--	--		--	--		--	--		--	--		--	--		--	--		--	--		--	--		--	--		--	--
--	--		2.00321	3.90699		--	--		--	--		--	--		--	--		--	--		--	--		--	--		--	--		--	--		--	--
--	--		2.55371	4.17037		--	--		--	--		--	--		--	--		--	--		--	--		--	--		--	--		--	--		--	--
--	--		6.96591	5.57388		--	--		--	--		--	--		--	--		--	--		--	--		--	--		--	--		--	--		--	--
--	--		5.81293	6.08475		--	--		--	--		--	--		--	--		--	--		--	--		--	--		--	--		--	--		--	--
--	--		6.37332	5.92378		--	--		--	--		--	--		--	--		--	--		--	--		--	--		--	--		--	--		--	--
--	--		5.35918	5.66618		--	--		--	--		--	--		--	--		--	--		--	--		--	--		--	--		--	--		--	--
--	--		6.13902	5.50994		--	--		--	--		--	--		--	--		--	--		--	--		--	--		--	--		--	--		--	--
--	--		4.66638	4.88214		--	--		--	--		--	--		--	--		--	--		--	--		--	--		--	--		--	--		--	--
--	--		4.80306	4.05011		--	--		--	--		--	--		--	--		--	--		--	--		--	--		--	--		--	--		--	--
--	--		6.42882	3.79286		--	--		--	--		--	--		--	--		--	--		--	--		--	--		--	--		--	--		--	--
--	--		6.58662	4.22259		--	--		--	--		--	--		--	--		--	--		--	--		--	--		--	--		--	--		--	--
--	--		6.73525	4.44101		--	--		--	--		--	--		--	--		--	--		--	--		--	--		--	--		--	--		--	--
--	--		0	0		--	--		--	--		--	--		--	--		--	--		--	--		--	--		--	--		--	--		--	--
--	--		0	0		--	--		--	--		--	--		--	--		--	--		--	--		--	--		--	--		--	--		--	--
--	--		0	0		--	--		--	--		--	--		--	--		--	--		--	--		--	--		--	--		--	--		--	--
--	--		0	0		--	--		--	--		--	--		--	--		--	--		--	--		--	--		--	--		--	--		--	--
--	--		0	0		--	--		--	--		--	--		--	--		--	--		--	--		--	--		--	--		--	--		--	--
--	--		0	0		--	--		--	--		--	--		--	--		--	--		--	--		--	--		--	--		--	--		--	--
--	--		0	0		--	--		--	--		--	--		--	--		--	--		--	--		--	--		--	--		--	--		--	--
--	--		0	0		--	--		--	--		--	--		--	--		--	--		--	--		--	--		--	--		--	--		--	--
--	--		0	0		--	--		--	--		--	--		--	--		--	--		--	--		--	--		--	--		--	--		--	--
--	--		0	0		--	--		--	--		--	--		--	--		--	--		--	--		--	--		--	--		--	--		--	--
--	--		0	0		--	--		--	--		--	--		--	--		--	--		--	--		--	--		--	--		--	--		--	--
--	--		0	0		--	--		--	--		--	--		--	--		--	--		--	--		--	--		--	--		--	--		--	--
--	--		0	0		--	--		--	--		--	--		--	--		--	--		--	--		--	--		--	--		--	--		--	--
--	--		0	0		--	--		--	--		--	--		--	--		--	--		--	--		--	--		--	--		--	--		--	--
--	--		0	0		--	--		--	--		--	--		--	--		--	--		--	--		--	--		--	--		--	--		--	--
--	--		0	0		--	--		--	--		--	--		--	--		--	--		--	--		--	--		--	--		--	--		--	--
--	--		0	0		--	--		--	--		--	--		--	--		--	--		--	--		--	--		--	--		--	--		--	--
--	--		0	0		--	--		--	--		--	--		--	--		--	--		--	--		--	--		--	--		--	--		--	--
--	--		0	0		--	--		--	--		--	--		--	--		--	--		--	--		--	--		--	--		--	--		--	--
--	--		0	0		--	--		--	--		--	--		--	--		--	--		--	--		--	--		--	--		--	--		--	--
--	--		0	0		--	--		--	--		--	--		--	--		--	--		--	--		--	--		--	--		--	--		--	--
--	--		0	0		--	--		--	--		--	--		--	--		--	--		--	--		--	--		--	--		--	--		--	--
--	--		0	0		--	--		--	--		--	--		--	--		--	--		--	--		--	--		--	--		--	--		--	--
--	--		0	0		--	--		--	--		--	--		--	--		--	--		--	--		--	--		--	--		--	--		--	--
--	--		0	0		--	--		--	--		--	--		--	--		--	--		--	--		--	--		--	--		--	--		--	--
--	--		0	0		--	--		--	--		--	--		--	--		--	--		--	--		--	--		--	--		--	--		--	--
--	--		0	0		--	--		--	--		--	--		--	--		--	--		--	--		--	--		--	--		--	--		--	--
--	--		0	0		--	--		--	--		--	--		--	--		--	--		--	--		--	--		--	--		--	--		--	--
--	--		0	0		--	--		--	--		--	--		--	--		--	--		--	--		--	--		--	--		--	--		--	--
--	--		0	0		--	--		--	--		--	--		--	--		--	--		--	--		--	--		--	--		--	--		--	--
--	--		0	0		--	--		--	--		--	--		--	--		--	--		--	--		--	--		--	--		--	--		--	--
--	--		0	0		--	--		--	--		--	--		--	--		--	--		--	--		--	--		--	--		--	--		--	--
--	--		0	0		--	--		--	--		--	--		--	--		--	--		--	--		--	--		--	--		--	--		--	--
--	--		0	0		--	--		--	--		--	--		--	--		--	--		--	--		--	--		--	--		--	--		--	--
--	--		0	0		--	--		--	--		--	--		--	--		--	--		--	--		--	--		--	--		--	--		--	--
--	--		0	0		--	--		--	--		--	--		--	--		--	--		--	--		--	--		--	--		--	--		--	--
--	--		0	0		--	--		--	--		--	--		--	--		--	--		--	--		--	--		--	--		--	--		--	--
--	--		0	0		--	--		--	--		--	--		--	--		--	--		--	--		--	--		--	--		--	--		--	--
--	--		0	0		--	--		--	--		--	--		--	--		--	--		--	--		--	--		--	--		--	--		--	--
--	--		0	0		--	--		--	--		--	--		--	--		--	--		--	--		--	--		--	--		--	--		--	--
--	--		0	0		--	--		--	--		--	--		--	--		--	--		--	--		--	--		--	--		--	--		--	--
--	--		0	0		--	--		--	--		--	--		--	--		--	--		--	--		--	--		--	--		--	--		--	--
--	--		0	0		--	--		--	--		--	--		--	--		--	--		--	--		--	--		--	--		--	--		--	--
--	--		0	0		--	--		--	--		--	--		--	--		--	--		--	--		--	--		--	--		--	--		--	--
--	--		0	0		--	--		--	--		--	--		--	--		--	--		--	--		--	--		--	--		--	--		--	--
--	--		0	0		--	--		--	--		--	--		--	--		--	--		--	--		--	--		--	--		--	--		--	--
--	--		0	0		--	--		--	--		--	--		--	--		--	--		--	--		--	--		--	--		--	--		--	--
--	--		0	0		--	--		--	--		--	--		--	--		--	--		--	--		--	--		--	--		--	--		--	--
--	--		0	0		--	--		--	--		--	--		--	--		--	--		--	--		--	--		--	--		--	--		--	--
--	--		0	0		--	--		--	--		--	--		--	--		--	--		--	--		--	--		--	--		--	--		--	--
--	--		0	0		--	--		--	--		--	--		--	--		--	--		--	--		--	--		--	--		--	--		--	--
--	--		0	0		--	--		--	--		--	--		--	--		--	--		--	--		--	--		--	--		--	--		--	--
--	--		0.76131	1.06337		--	--		--	--		--	--		--	--		--	--		--	--		--	--		--	--		--	--		--	--
--	--		1.15232	1.38636		--	--		--	--		--	--		--	--		--	--		--	--		--	--		--	--		--	--		--	--
--	--		1.54332	1.61156		--	--		--	--		--	--		--	--		--	--		--	--		--	--		--	--		--	--		--	--
--	--		1.73569	1.6839		--	--		--	--		--	--		--	--		--	--		--	--		--	--		--	--		--	--		--	--
--	--		1.72944	1.65924		--	--		--	--		--	--		--	--		--	--		--	--		--	--		--	--		--	--		--	--
--	--		1.72318	1.63853		--	--		--	--		--	--		--	--		--	--		--	--		--	--		--	--		--	--		--	--
--	--		1.47821	1.59959		--	--		--	--		--	--		--	--		--	--		--	--		--	--		--	--		--	--		--	--
--	--		1.17565	1.5672		--	--		--	--		--	--		--	--		--	--		--	--		--	--		--	--		--	--		--	--
--	--		1.14918	1.59542		--	--		--	--		--	--		--	--		--	--		--	--		--	--		--	--		--	--		--	--
--	--		1.23931	1.66866		--	--		--	--		--	--		--	--		--	--		--	--		--	--		--	--		--	--		--	--
--	--		2.01267	1.7896		--	--		--	--		--	--		--	--		--	--		--	--		--	--		--	--		--	--		--	--
--	--		2.78896	1.88294		--	--		--	--		--	--		--	--		--	--		--	--		--	--		--	--		--	--		--	--
--	--		2.02643	1.93835		--	--		--	--		--	--		--	--		--	--		--	--		--	--		--	--		--	--		--	--
--	--		1.88185	2.0359		--	--		--	--		--	--		--	--		--	--		--	--		--	--		--	--		--	--		--	--
--	--		1.53742	2.17933		--	--		--	--		--	--		--	--		--	--		--	--		--	--		--	--		--	--		--	--
--	--		1.78876	2.11137		--	--		--	--		--	--		--	--		--	--		--	--		--	--		--	--		--	--		--	--
--	--		1.51697	1.96429		--	--		--	--		--	--		--	--		--	--		--	--		--	--		--	--		--	--		--	--
--	--		2.44804	1.88895		--	--		--	--		--	--		--	--		--	--		--	--		--	--		--	--		--	--		--	--
--	--		1.55748	1.93025		--	--		--	--		--	--		--	--		--	--		--	--		--	--		--	--		--	--		--	--
--	--		1.03317	2.04653		--	--		--	--		--	--		--	--		--	--		--	--		--	--		--	--		--	--		--	--
--	--		1.59786	2.10617		--	--		--	--		--	--		--	--		--	--		--	--		--	--		--	--		--	--		--	--
--	--		2.04955	1.72966		--	--		--	--		--	--		--	--		--	--		--	--		--	--		--	--		--	--		--	--
--	--		1.5146	1.13843		--	--		--	--		--	--		--	--		--	--		--	--		--	--		--	--		--	--		--	--
--	--		2.03989	0.80454		--	--		--	--		--	--		--	--		--	--		--	--		--	--		--	--		--	--		--	--
--	--		1.63136	0.80575		--	--		--	--		--	--		--	--		--	--		--	--		--	--		--	--		--	--		--	--
--	--		0.91434	0.81881		--	--		--	--		--	--		--	--		--	--		--	--		--	--		--	--		--	--		--	--
--	--		4.39955	6.52804		--	--		--	--		--	--		--	--		--	--		--	--		--	--		--	--		--	--		--	--
--	--		5.24662	7.46635		--	--		--	--		--	--		--	--		--	--		--	--		--	--		--	--		--	--		--	--
--	--		6.0937	8.32204		--	--		--	--		--	--		--	--		--	--		--	--		--	--		--	--		--	--		--	--
--	--		6.66793	8.86253		--	--		--	--		--	--		--	--		--	--		--	--		--	--		--	--		--	--		--	--
--	--		6.96932	9.10152		--	--		--	--		--	--		--	--		--	--		--	--		--	--		--	--		--	--		--	--
--	--		7.27071	9.30419		--	--		--	--		--	--		--	--		--	--		--	--		--	--		--	--		--	--		--	--
--	--		7.82608	9.81522		--	--		--	--		--	--		--	--		--	--		--	--		--	--		--	--		--	--		--	--
--	--		7.30317	10.336		--	--		--	--		--	--		--	--		--	--		--	--		--	--		--	--		--	--		--	--
--	--		10.9665	10.5373		--	--		--	--		--	--		--	--		--	--		--	--		--	--		--	--		--	--		--	--
--	--		8.23465	10.5262		--	--		--	--		--	--		--	--		--	--		--	--		--	--		--	--		--	--		--	--
--	--		8.92515	10.5632		--	--		--	--		--	--		--	--		--	--		--	--		--	--		--	--		--	--		--	--
--	--		9.20058	11.2137		--	--		--	--		--	--		--	--		--	--		--	--		--	--		--	--		--	--		--	--
--	--		9.61027	11.8717		--	--		--	--		--	--		--	--		--	--		--	--		--	--		--	--		--	--		--	--
--	--		11.5041	12.3022		--	--		--	--		--	--		--	--		--	--		--	--		--	--		--	--		--	--		--	--
--	--		9.95456	12.5155		--	--		--	--		--	--		--	--		--	--		--	--		--	--		--	--		--	--		--	--
--	--		12.5919	12.6956		--	--		--	--		--	--		--	--		--	--		--	--		--	--		--	--		--	--		--	--
--	--		8.68098	12.1196		--	--		--	--		--	--		--	--		--	--		--	--		--	--		--	--		--	--		--	--
--	--		10.9585	11.6701		--	--		--	--		--	--		--	--		--	--		--	--		--	--		--	--		--	--		--	--
--	--		11.0677	11.2864		--	--		--	--		--	--		--	--		--	--		--	--		--	--		--	--		--	--		--	--
--	--		8.66234	10.9537		--	--		--	--		--	--		--	--		--	--		--	--		--	--		--	--		--	--		--	--
--	--		11.8822	10.6622		--	--		--	--		--	--		--	--		--	--		--	--		--	--		--	--		--	--		--	--
--	--		11.0546	10.9499		--	--		--	--		--	--		--	--		--	--		--	--		--	--		--	--		--	--		--	--
--	--		11.0161	11.0873		--	--		--	--		--	--		--	--		--	--		--	--		--	--		--	--		--	--		--	--
--	--		13.9433	11.0859		--	--		--	--		--	--		--	--		--	--		--	--		--	--		--	--		--	--		--	--
--	--		12.7641	10.6256		--	--		--	--		--	--		--	--		--	--		--	--		--	--		--	--		--	--		--	--
--	--		11.2087	10.183		--	--		--	--		--	--		--	--		--	--		--	--		--	--		--	--		--	--		--	--
--	--		96.0743	148.704		--	--		--	--		--	--		--	--		--	--		--	--		--	--		--	--		--	--		--	--
--	--		119.756	176.475		--	--		--	--		--	--		--	--		--	--		--	--		--	--		--	--		--	--		--	--
--	--		143.437	199.597		--	--		--	--		--	--		--	--		--	--		--	--		--	--		--	--		--	--		--	--
--	--		156.268	209.933		--	--		--	--		--	--		--	--		--	--		--	--		--	--		--	--		--	--		--	--
--	--		158.247	211.008		--	--		--	--		--	--		--	--		--	--		--	--		--	--		--	--		--	--		--	--
--	--		160.226	212.344		--	--		--	--		--	--		--	--		--	--		--	--		--	--		--	--		--	--		--	--
--	--		193.828	225.772		--	--		--	--		--	--		--	--		--	--		--	--		--	--		--	--		--	--		--	--
--	--		198.809	237.693		--	--		--	--		--	--		--	--		--	--		--	--		--	--		--	--		--	--		--	--
--	--		178.657	249.73		--	--		--	--		--	--		--	--		--	--		--	--		--	--		--	--		--	--		--	--
--	--		219.409	267.172		--	--		--	--		--	--		--	--		--	--		--	--		--	--		--	--		--	--		--	--
--	--		239.084	283.33		--	--		--	--		--	--		--	--		--	--		--	--		--	--		--	--		--	--		--	--
--	--		251.586	313.244		--	--		--	--		--	--		--	--		--	--		--	--		--	--		--	--		--	--		--	--
--	--		286.998	338.141		--	--		--	--		--	--		--	--		--	--		--	--		--	--		--	--		--	--		--	--
--	--		334.114	344.103		--	--		--	--		--	--		--	--		--	--		--	--		--	--		--	--		--	--		--	--
--	--		352.909	338.833		--	--		--	--		--	--		--	--		--	--		--	--		--	--		--	--		--	--		--	--
--	--		334.431	334.744		--	--		--	--		--	--		--	--		--	--		--	--		--	--		--	--		--	--		--	--
--	--		380.179	329.598		--	--		--	--		--	--		--	--		--	--		--	--		--	--		--	--		--	--		--	--
--	--		341.753	323.173		--	--		--	--		--	--		--	--		--	--		--	--		--	--		--	--		--	--		--	--
--	--		345.19	322.599		--	--		--	--		--	--		--	--		--	--		--	--		--	--		--	--		--	--		--	--
--	--		389.788	325.761		--	--		--	--		--	--		--	--		--	--		--	--		--	--		--	--		--	--		--	--
--	--		366.074	325.999		--	--		--	--		--	--		--	--		--	--		--	--		--	--		--	--		--	--		--	--
--	--		360.23	318.713		--	--		--	--		--	--		--	--		--	--		--	--		--	--		--	--		--	--		--	--
--	--		350.37	312.9		--	--		--	--		--	--		--	--		--	--		--	--		--	--		--	--		--	--		--	--
--	--		352.271	306.682		--	--		--	--		--	--		--	--		--	--		--	--		--	--		--	--		--	--		--	--
--	--		346.924	300.593		--	--		--	--		--	--		--	--		--	--		--	--		--	--		--	--		--	--		--	--
--	--		361.5	290.815		--	--		--	--		--	--		--	--		--	--		--	--		--	--		--	--		--	--		--	--
--	--		0	0		--	--		--	--		--	--		--	--		--	--		--	--		--	--		--	--		--	--		--	--
--	--		0	0		--	--		--	--		--	--		--	--		--	--		--	--		--	--		--	--		--	--		--	--
--	--		0	0		--	--		--	--		--	--		--	--		--	--		--	--		--	--		--	--		--	--		--	--
--	--		0	0		--	--		--	--		--	--		--	--		--	--		--	--		--	--		--	--		--	--		--	--
--	--		0	0		--	--		--	--		--	--		--	--		--	--		--	--		--	--		--	--		--	--		--	--
--	--		0	0		--	--		--	--		--	--		--	--		--	--		--	--		--	--		--	--		--	--		--	--
--	--		0	0		--	--		--	--		--	--		--	--		--	--		--	--		--	--		--	--		--	--		--	--
--	--		0	0		--	--		--	--		--	--		--	--		--	--		--	--		--	--		--	--		--	--		--	--
--	--		0	0		--	--		--	--		--	--		--	--		--	--		--	--		--	--		--	--		--	--		--	--
--	--		0	0		--	--		--	--		--	--		--	--		--	--		--	--		--	--		--	--		--	--		--	--
--	--		0	0		--	--		--	--		--	--		--	--		--	--		--	--		--	--		--	--		--	--		--	--
--	--		0	0		--	--		--	--		--	--		--	--		--	--		--	--		--	--		--	--		--	--		--	--
--	--		0	0		--	--		--	--		--	--		--	--		--	--		--	--		--	--		--	--		--	--		--	--
--	--		0	0		--	--		--	--		--	--		--	--		--	--		--	--		--	--		--	--		--	--		--	--
--	--		0	0		--	--		--	--		--	--		--	--		--	--		--	--		--	--		--	--		--	--		--	--
--	--		0	0		--	--		--	--		--	--		--	--		--	--		--	--		--	--		--	--		--	--		--	--
--	--		0	0		--	--		--	--		--	--		--	--		--	--		--	--		--	--		--	--		--	--		--	--
--	--		0	0		--	--		--	--		--	--		--	--		--	--		--	--		--	--		--	--		--	--		--	--
--	--		0	0		--	--		--	--		--	--		--	--		--	--		--	--		--	--		--	--		--	--		--	--
--	--		0	0		--	--		--	--		--	--		--	--		--	--		--	--		--	--		--	--		--	--		--	--
--	--		0	0		--	--		--	--		--	--		--	--		--	--		--	--		--	--		--	--		--	--		--	--
--	--		0	0		--	--		--	--		--	--		--	--		--	--		--	--		--	--		--	--		--	--		--	--
--	--		0	0		--	--		--	--		--	--		--	--		--	--		--	--		--	--		--	--		--	--		--	--
--	--		0	0		--	--		--	--		--	--		--	--		--	--		--	--		--	--		--	--		--	--		--	--
--	--		0	0		--	--		--	--		--	--		--	--		--	--		--	--		--	--		--	--		--	--		--	--
--	--		0	0		--	--		--	--		--	--		--	--		--	--		--	--		--	--		--	--		--	--		--	--
--	--		0	0		--	--		--	--		--	--		--	--		--	--		--	--		--	--		--	--		--	--		--	--
--	--		0	0		--	--		--	--		--	--		--	--		--	--		--	--		--	--		--	--		--	--		--	--
--	--		0	0		--	--		--	--		--	--		--	--		--	--		--	--		--	--		--	--		--	--		--	--
--	--		0	0		--	--		--	--		--	--		--	--		--	--		--	--		--	--		--	--		--	--		--	--
--	--		0	0		--	--		--	--		--	--		--	--		--	--		--	--		--	--		--	--		--	--		--	--
--	--		0	0		--	--		--	--		--	--		--	--		--	--		--	--		--	--		--	--		--	--		--	--
--	--		0	0		--	--		--	--		--	--		--	--		--	--		--	--		--	--		--	--		--	--		--	--
--	--		0	0		--	--		--	--		--	--		--	--		--	--		--	--		--	--		--	--		--	--		--	--
--	--		0	0		--	--		--	--		--	--		--	--		--	--		--	--		--	--		--	--		--	--		--	--
--	--		0	0		--	--		--	--		--	--		--	--		--	--		--	--		--	--		--	--		--	--		--	--
--	--		0	0		--	--		--	--		--	--		--	--		--	--		--	--		--	--		--	--		--	--		--	--
--	--		0	0		--	--		--	--		--	--		--	--		--	--		--	--		--	--		--	--		--	--		--	--
--	--		0	0		--	--		--	--		--	--		--	--		--	--		--	--		--	--		--	--		--	--		--	--
--	--		0	0		--	--		--	--		--	--		--	--		--	--		--	--		--	--		--	--		--	--		--	--
--	--		0	0		--	--		--	--		--	--		--	--		--	--		--	--		--	--		--	--		--	--		--	--
--	--		0	0		--	--		--	--		--	--		--	--		--	--		--	--		--	--		--	--		--	--		--	--
--	--		0	0		--	--		--	--		--	--		--	--		--	--		--	--		--	--		--	--		--	--		--	--
--	--		0	0		--	--		--	--		--	--		--	--		--	--		--	--		--	--		--	--		--	--		--	--
--	--		0	0		--	--		--	--		--	--		--	--		--	--		--	--		--	--		--	--		--	--		--	--
--	--		0	0		--	--		--	--		--	--		--	--		--	--		--	--		--	--		--	--		--	--		--	--
--	--		0	0		--	--		--	--		--	--		--	--		--	--		--	--		--	--		--	--		--	--		--	--
--	--		0	0		--	--		--	--		--	--		--	--		--	--		--	--		--	--		--	--		--	--		--	--
--	--		0	0		--	--		--	--		--	--		--	--		--	--		--	--		--	--		--	--		--	--		--	--
--	--		0	0		--	--		--	--		--	--		--	--		--	--		--	--		--	--		--	--		--	--		--	--
--	--		0	0		--	--		--	--		--	--		--	--		--	--		--	--		--	--		--	--		--	--		--	--
--	--		0	0		--	--		--	--		--	--		--	--		--	--		--	--		--	--		--	--		--	--		--	--
--	--		0.22817	0.19554		--	--		--	--		--	--		--	--		--	--		--	--		--	--		--	--		--	--		--	--
--	--		0.23725	0.23232		--	--		--	--		--	--		--	--		--	--		--	--		--	--		--	--		--	--		--	--
--	--		0.24633	0.26923		--	--		--	--		--	--		--	--		--	--		--	--		--	--		--	--		--	--		--	--
--	--		0.24965	0.31277		--	--		--	--		--	--		--	--		--	--		--	--		--	--		--	--		--	--		--	--
--	--		0.24722	0.36323		--	--		--	--		--	--		--	--		--	--		--	--		--	--		--	--		--	--		--	--
--	--		0.24479	0.4148		--	--		--	--		--	--		--	--		--	--		--	--		--	--		--	--		--	--		--	--
--	--		0.28091	0.39449		--	--		--	--		--	--		--	--		--	--		--	--		--	--		--	--		--	--		--	--
--	--		0.26621	0.37401		--	--		--	--		--	--		--	--		--	--		--	--		--	--		--	--		--	--		--	--
--	--		0.28746	0.37688		--	--		--	--		--	--		--	--		--	--		--	--		--	--		--	--		--	--		--	--
--	--		0.35465	0.40248		--	--		--	--		--	--		--	--		--	--		--	--		--	--		--	--		--	--		--	--
--	--		0.41931	0.42726		--	--		--	--		--	--		--	--		--	--		--	--		--	--		--	--		--	--		--	--
--	--		0.41119	0.47045		--	--		--	--		--	--		--	--		--	--		--	--		--	--		--	--		--	--		--	--
--	--		0.46469	0.51471		--	--		--	--		--	--		--	--		--	--		--	--		--	--		--	--		--	--		--	--
--	--		0.50826	0.58075		--	--		--	--		--	--		--	--		--	--		--	--		--	--		--	--		--	--		--	--
--	--		0.55459	0.6666		--	--		--	--		--	--		--	--		--	--		--	--		--	--		--	--		--	--		--	--
--	--		0.57837	0.7532		--	--		--	--		--	--		--	--		--	--		--	--		--	--		--	--		--	--		--	--
--	--		0.61175	0.802		--	--		--	--		--	--		--	--		--	--		--	--		--	--		--	--		--	--		--	--
--	--		0.62005	0.85079		--	--		--	--		--	--		--	--		--	--		--	--		--	--		--	--		--	--		--	--
--	--		0.61211	0.8875		--	--		--	--		--	--		--	--		--	--		--	--		--	--		--	--		--	--		--	--
--	--		0.62208	0.91348		--	--		--	--		--	--		--	--		--	--		--	--		--	--		--	--		--	--		--	--
--	--		0.67477	0.93913		--	--		--	--		--	--		--	--		--	--		--	--		--	--		--	--		--	--		--	--
--	--		0.64513	0.96621		--	--		--	--		--	--		--	--		--	--		--	--		--	--		--	--		--	--		--	--
--	--		0.6618	0.99342		--	--		--	--		--	--		--	--		--	--		--	--		--	--		--	--		--	--		--	--
--	--		0.65706	1.0168		--	--		--	--		--	--		--	--		--	--		--	--		--	--		--	--		--	--		--	--
--	--		0.71279	1.03618		--	--		--	--		--	--		--	--		--	--		--	--		--	--		--	--		--	--		--	--
--	--		0.78653	1.03046		--	--		--	--		--	--		--	--		--	--		--	--		--	--		--	--		--	--		--	--
--	--		2.91039	2.99878		--	--		--	--		--	--		--	--		--	--		--	--		--	--		--	--		--	--		--	--
--	--		3.04908	3.08444		--	--		--	--		--	--		--	--		--	--		--	--		--	--		--	--		--	--		--	--
--	--		3.18776	3.17176		--	--		--	--		--	--		--	--		--	--		--	--		--	--		--	--		--	--		--	--
--	--		3.23673	3.14956		--	--		--	--		--	--		--	--		--	--		--	--		--	--		--	--		--	--		--	--
--	--		3.19599	3.02852		--	--		--	--		--	--		--	--		--	--		--	--		--	--		--	--		--	--		--	--
--	--		3.15525	2.93212		--	--		--	--		--	--		--	--		--	--		--	--		--	--		--	--		--	--		--	--
--	--		3.71619	3.18994		--	--		--	--		--	--		--	--		--	--		--	--		--	--		--	--		--	--		--	--
--	--		3.65026	3.44127		--	--		--	--		--	--		--	--		--	--		--	--		--	--		--	--		--	--		--	--
--	--		3.40153	3.59726		--	--		--	--		--	--		--	--		--	--		--	--		--	--		--	--		--	--		--	--
--	--		3.7521	3.64403		--	--		--	--		--	--		--	--		--	--		--	--		--	--		--	--		--	--		--	--
--	--		4.08907	3.68293		--	--		--	--		--	--		--	--		--	--		--	--		--	--		--	--		--	--		--	--
--	--		4.82955	3.92344		--	--		--	--		--	--		--	--		--	--		--	--		--	--		--	--		--	--		--	--
--	--		5.49166	4.15509		--	--		--	--		--	--		--	--		--	--		--	--		--	--		--	--		--	--		--	--
--	--		4.90087	4.2887		--	--		--	--		--	--		--	--		--	--		--	--		--	--		--	--		--	--		--	--
--	--		5.08437	4.30558		--	--		--	--		--	--		--	--		--	--		--	--		--	--		--	--		--	--		--	--
--	--		4.0843	4.29002		--	--		--	--		--	--		--	--		--	--		--	--		--	--		--	--		--	--		--	--
--	--		2.9072	4.05312		--	--		--	--		--	--		--	--		--	--		--	--		--	--		--	--		--	--		--	--
--	--		3.30688	3.75157		--	--		--	--		--	--		--	--		--	--		--	--		--	--		--	--		--	--		--	--
--	--		3.4684	3.50584		--	--		--	--		--	--		--	--		--	--		--	--		--	--		--	--		--	--		--	--
--	--		4.2527	3.30854		--	--		--	--		--	--		--	--		--	--		--	--		--	--		--	--		--	--		--	--
--	--		2.30948	3.10068		--	--		--	--		--	--		--	--		--	--		--	--		--	--		--	--		--	--		--	--
--	--		3.04333	3.13856		--	--		--	--		--	--		--	--		--	--		--	--		--	--		--	--		--	--		--	--
--	--		3.13403	3.19256		--	--		--	--		--	--		--	--		--	--		--	--		--	--		--	--		--	--		--	--
--	--		1.50536	3.23849		--	--		--	--		--	--		--	--		--	--		--	--		--	--		--	--		--	--		--	--
--	--		1.55941	3.25185		--	--		--	--		--	--		--	--		--	--		--	--		--	--		--	--		--	--		--	--
--	--		1.43651	3.27214		--	--		--	--		--	--		--	--		--	--		--	--		--	--		--	--		--	--		--	--
--	--		0.78211	0.75475		--	--		--	--		--	--		--	--		--	--		--	--		--	--		--	--		--	--		--	--
--	--		0.81662	0.78069		--	--		--	--		--	--		--	--		--	--		--	--		--	--		--	--		--	--		--	--
--	--		0.85113	0.81225		--	--		--	--		--	--		--	--		--	--		--	--		--	--		--	--		--	--		--	--
--	--		0.86491	0.82161		--	--		--	--		--	--		--	--		--	--		--	--		--	--		--	--		--	--		--	--
--	--		0.85794	0.8039		--	--		--	--		--	--		--	--		--	--		--	--		--	--		--	--		--	--		--	--
--	--		0.85098	0.78533		--	--		--	--		--	--		--	--		--	--		--	--		--	--		--	--		--	--		--	--
--	--		0.83141	0.78787		--	--		--	--		--	--		--	--		--	--		--	--		--	--		--	--		--	--		--	--
--	--		0.80674	0.80108		--	--		--	--		--	--		--	--		--	--		--	--		--	--		--	--		--	--		--	--
--	--		0.81434	0.82036		--	--		--	--		--	--		--	--		--	--		--	--		--	--		--	--		--	--		--	--
--	--		0.83585	0.84956		--	--		--	--		--	--		--	--		--	--		--	--		--	--		--	--		--	--		--	--
--	--		0.56644	0.86476		--	--		--	--		--	--		--	--		--	--		--	--		--	--		--	--		--	--		--	--
--	--		0.99168	0.87539		--	--		--	--		--	--		--	--		--	--		--	--		--	--		--	--		--	--		--	--
--	--		0.82451	0.87978		--	--		--	--		--	--		--	--		--	--		--	--		--	--		--	--		--	--		--	--
--	--		0.84149	0.88561		--	--		--	--		--	--		--	--		--	--		--	--		--	--		--	--		--	--		--	--
--	--		0.80598	0.90997		--	--		--	--		--	--		--	--		--	--		--	--		--	--		--	--		--	--		--	--
--	--		0.70761	0.92559		--	--		--	--		--	--		--	--		--	--		--	--		--	--		--	--		--	--		--	--
--	--		0.63835	0.92997		--	--		--	--		--	--		--	--		--	--		--	--		--	--		--	--		--	--		--	--
--	--		0.74136	0.94		--	--		--	--		--	--		--	--		--	--		--	--		--	--		--	--		--	--		--	--
--	--		0.59882	0.9519		--	--		--	--		--	--		--	--		--	--		--	--		--	--		--	--		--	--		--	--
--	--		0.7055	0.96332		--	--		--	--		--	--		--	--		--	--		--	--		--	--		--	--		--	--		--	--
--	--		1.18671	0.96928		--	--		--	--		--	--		--	--		--	--		--	--		--	--		--	--		--	--		--	--
--	--		0.81389	0.96639		--	--		--	--		--	--		--	--		--	--		--	--		--	--		--	--		--	--		--	--
--	--		1.31524	1.01895		--	--		--	--		--	--		--	--		--	--		--	--		--	--		--	--		--	--		--	--
--	--		1.17216	1.10163		--	--		--	--		--	--		--	--		--	--		--	--		--	--		--	--		--	--		--	--
--	--		1.23105	1.1986		--	--		--	--		--	--		--	--		--	--		--	--		--	--		--	--		--	--		--	--
--	--		1.72543	1.2659		--	--		--	--		--	--		--	--		--	--		--	--		--	--		--	--		--	--		--	--
--	--		104.828	159.039		--	--		--	--		--	--		--	--		--	--		--	--		--	--		--	--		--	--		--	--
--	--		121.142	178.053		--	--		--	--		--	--		--	--		--	--		--	--		--	--		--	--		--	--		--	--
--	--		137.456	195.921		--	--		--	--		--	--		--	--		--	--		--	--		--	--		--	--		--	--		--	--
--	--		150.258	209.032		--	--		--	--		--	--		--	--		--	--		--	--		--	--		--	--		--	--		--	--
--	--		159.547	217.598		--	--		--	--		--	--		--	--		--	--		--	--		--	--		--	--		--	--		--	--
--	--		168.836	225.52		--	--		--	--		--	--		--	--		--	--		--	--		--	--		--	--		--	--		--	--
--	--		181.987	231.557		--	--		--	--		--	--		--	--		--	--		--	--		--	--		--	--		--	--		--	--
--	--		187.164	237.081		--	--		--	--		--	--		--	--		--	--		--	--		--	--		--	--		--	--		--	--
--	--		167.327	241.433		--	--		--	--		--	--		--	--		--	--		--	--		--	--		--	--		--	--		--	--
--	--		189.678	247.392		--	--		--	--		--	--		--	--		--	--		--	--		--	--		--	--		--	--		--	--
--	--		191.943	252.461		--	--		--	--		--	--		--	--		--	--		--	--		--	--		--	--		--	--		--	--
--	--		204.932	274.84		--	--		--	--		--	--		--	--		--	--		--	--		--	--		--	--		--	--		--	--
--	--		214.838	294.055		--	--		--	--		--	--		--	--		--	--		--	--		--	--		--	--		--	--		--	--
--	--		265.432	302.671		--	--		--	--		--	--		--	--		--	--		--	--		--	--		--	--		--	--		--	--
--	--		258.523	302.095		--	--		--	--		--	--		--	--		--	--		--	--		--	--		--	--		--	--		--	--
--	--		279.896	296.828		--	--		--	--		--	--		--	--		--	--		--	--		--	--		--	--		--	--		--	--
--	--		259.773	281.597		--	--		--	--		--	--		--	--		--	--		--	--		--	--		--	--		--	--		--	--
--	--		267.548	267.889		--	--		--	--		--	--		--	--		--	--		--	--		--	--		--	--		--	--		--	--
--	--		265.61	260.906		--	--		--	--		--	--		--	--		--	--		--	--		--	--		--	--		--	--		--	--
--	--		292.974	259.072		--	--		--	--		--	--		--	--		--	--		--	--		--	--		--	--		--	--		--	--
--	--		329.261	256.709		--	--		--	--		--	--		--	--		--	--		--	--		--	--		--	--		--	--		--	--
--	--		318.018	253.884		--	--		--	--		--	--		--	--		--	--		--	--		--	--		--	--		--	--		--	--
--	--		353.998	249.903		--	--		--	--		--	--		--	--		--	--		--	--		--	--		--	--		--	--		--	--
--	--		367.127	245.368		--	--		--	--		--	--		--	--		--	--		--	--		--	--		--	--		--	--		--	--
--	--		384.605	240.999		--	--		--	--		--	--		--	--		--	--		--	--		--	--		--	--		--	--		--	--
--	--		403.605	239.436		--	--		--	--		--	--		--	--		--	--		--	--		--	--		--	--		--	--		--	--
--	--		6.17819	7.20318		--	--		--	--		--	--		--	--		--	--		--	--		--	--		--	--		--	--		--	--
--	--		6.31296	7.29708		--	--		--	--		--	--		--	--		--	--		--	--		--	--		--	--		--	--		--	--
--	--		6.44773	7.4002		--	--		--	--		--	--		--	--		--	--		--	--		--	--		--	--		--	--		--	--
--	--		6.95276	7.84559		--	--		--	--		--	--		--	--		--	--		--	--		--	--		--	--		--	--		--	--
--	--		7.82807	8.66825		--	--		--	--		--	--		--	--		--	--		--	--		--	--		--	--		--	--		--	--
--	--		8.70338	9.50616		--	--		--	--		--	--		--	--		--	--		--	--		--	--		--	--		--	--		--	--
--	--		9.02758	9.59181		--	--		--	--		--	--		--	--		--	--		--	--		--	--		--	--		--	--		--	--
--	--		9.62293	9.65246		--	--		--	--		--	--		--	--		--	--		--	--		--	--		--	--		--	--		--	--
--	--		8.92567	10.0193		--	--		--	--		--	--		--	--		--	--		--	--		--	--		--	--		--	--		--	--
--	--		8.05478	10.7117		--	--		--	--		--	--		--	--		--	--		--	--		--	--		--	--		--	--		--	--
--	--		8.5917	11.3979		--	--		--	--		--	--		--	--		--	--		--	--		--	--		--	--		--	--		--	--
--	--		7.96591	11.7213		--	--		--	--		--	--		--	--		--	--		--	--		--	--		--	--		--	--		--	--
--	--		10.003	12.0455		--	--		--	--		--	--		--	--		--	--		--	--		--	--		--	--		--	--		--	--
--	--		8.95756	12.4554		--	--		--	--		--	--		--	--		--	--		--	--		--	--		--	--		--	--		--	--
--	--		10.2893	12.9509		--	--		--	--		--	--		--	--		--	--		--	--		--	--		--	--		--	--		--	--
--	--		9.40297	13.4487		--	--		--	--		--	--		--	--		--	--		--	--		--	--		--	--		--	--		--	--
--	--		12.6514	14.3148		--	--		--	--		--	--		--	--		--	--		--	--		--	--		--	--		--	--		--	--
--	--		13.9427	15.1738		--	--		--	--		--	--		--	--		--	--		--	--		--	--		--	--		--	--		--	--
--	--		15.7142	15.7641		--	--		--	--		--	--		--	--		--	--		--	--		--	--		--	--		--	--		--	--
--	--		16.3089	16.1002		--	--		--	--		--	--		--	--		--	--		--	--		--	--		--	--		--	--		--	--
--	--		17.3848	16.4425		--	--		--	--		--	--		--	--		--	--		--	--		--	--		--	--		--	--		--	--
--	--		20.5521	17.3901		--	--		--	--		--	--		--	--		--	--		--	--		--	--		--	--		--	--		--	--
--	--		23.1031	18.2854		--	--		--	--		--	--		--	--		--	--		--	--		--	--		--	--		--	--		--	--
--	--		23.8612	19.4998		--	--		--	--		--	--		--	--		--	--		--	--		--	--		--	--		--	--		--	--
--	--		25.7257	21.0682		--	--		--	--		--	--		--	--		--	--		--	--		--	--		--	--		--	--		--	--
--	--		31.1691	22.6311		--	--		--	--		--	--		--	--		--	--		--	--		--	--		--	--		--	--		--	--
--	--		19.9754	22.9915		--	--		--	--		--	--		--	--		--	--		--	--		--	--		--	--		--	--		--	--
--	--		21.4534	24.1879		--	--		--	--		--	--		--	--		--	--		--	--		--	--		--	--		--	--		--	--
--	--		22.9315	25.4042		--	--		--	--		--	--		--	--		--	--		--	--		--	--		--	--		--	--		--	--
--	--		24.1146	26.4878		--	--		--	--		--	--		--	--		--	--		--	--		--	--		--	--		--	--		--	--
--	--		25.0029	27.4487		--	--		--	--		--	--		--	--		--	--		--	--		--	--		--	--		--	--		--	--
--	--		25.8912	28.4629		--	--		--	--		--	--		--	--		--	--		--	--		--	--		--	--		--	--		--	--
--	--		26.8019	29.647		--	--		--	--		--	--		--	--		--	--		--	--		--	--		--	--		--	--		--	--
--	--		27.4285	30.9303		--	--		--	--		--	--		--	--		--	--		--	--		--	--		--	--		--	--		--	--
--	--		29.617	32.3548		--	--		--	--		--	--		--	--		--	--		--	--		--	--		--	--		--	--		--	--
--	--		29.658	33.879		--	--		--	--		--	--		--	--		--	--		--	--		--	--		--	--		--	--		--	--
--	--		34.4706	35.2458		--	--		--	--		--	--		--	--		--	--		--	--		--	--		--	--		--	--		--	--
--	--		35.7937	37.5209		--	--		--	--		--	--		--	--		--	--		--	--		--	--		--	--		--	--		--	--
--	--		32.6224	39.6952		--	--		--	--		--	--		--	--		--	--		--	--		--	--		--	--		--	--		--	--
--	--		45.6552	41.0158		--	--		--	--		--	--		--	--		--	--		--	--		--	--		--	--		--	--		--	--
--	--		46.5091	41.3201		--	--		--	--		--	--		--	--		--	--		--	--		--	--		--	--		--	--		--	--
--	--		39.7077	41.7459		--	--		--	--		--	--		--	--		--	--		--	--		--	--		--	--		--	--		--	--
--	--		49.5366	43.4987		--	--		--	--		--	--		--	--		--	--		--	--		--	--		--	--		--	--		--	--
--	--		52.7486	44.6016		--	--		--	--		--	--		--	--		--	--		--	--		--	--		--	--		--	--		--	--
--	--		49.6542	45.3313		--	--		--	--		--	--		--	--		--	--		--	--		--	--		--	--		--	--		--	--
--	--		48.0868	45.3796		--	--		--	--		--	--		--	--		--	--		--	--		--	--		--	--		--	--		--	--
--	--		52.2899	45.4484		--	--		--	--		--	--		--	--		--	--		--	--		--	--		--	--		--	--		--	--
--	--		51.5424	45.1826		--	--		--	--		--	--		--	--		--	--		--	--		--	--		--	--		--	--		--	--
--	--		47.0516	45.218		--	--		--	--		--	--		--	--		--	--		--	--		--	--		--	--		--	--		--	--
--	--		51.0956	45.13		--	--		--	--		--	--		--	--		--	--		--	--		--	--		--	--		--	--		--	--
--	--		45.6347	44.6906		--	--		--	--		--	--		--	--		--	--		--	--		--	--		--	--		--	--		--	--
--	--		40.5211	44.4056		--	--		--	--		--	--		--	--		--	--		--	--		--	--		--	--		--	--		--	--
--	--		0	0		--	--		--	--		--	--		--	--		--	--		--	--		--	--		--	--		--	--		--	--
--	--		0	0		--	--		--	--		--	--		--	--		--	--		--	--		--	--		--	--		--	--		--	--
--	--		0	0		--	--		--	--		--	--		--	--		--	--		--	--		--	--		--	--		--	--		--	--
--	--		0	0		--	--		--	--		--	--		--	--		--	--		--	--		--	--		--	--		--	--		--	--
--	--		0	0		--	--		--	--		--	--		--	--		--	--		--	--		--	--		--	--		--	--		--	--
--	--		0	0		--	--		--	--		--	--		--	--		--	--		--	--		--	--		--	--		--	--		--	--
--	--		0	0		--	--		--	--		--	--		--	--		--	--		--	--		--	--		--	--		--	--		--	--
--	--		0	0		--	--		--	--		--	--		--	--		--	--		--	--		--	--		--	--		--	--		--	--
--	--		0	0		--	--		--	--		--	--		--	--		--	--		--	--		--	--		--	--		--	--		--	--
--	--		0	0		--	--		--	--		--	--		--	--		--	--		--	--		--	--		--	--		--	--		--	--
--	--		0	0		--	--		--	--		--	--		--	--		--	--		--	--		--	--		--	--		--	--		--	--
--	--		0	0		--	--		--	--		--	--		--	--		--	--		--	--		--	--		--	--		--	--		--	--
--	--		0	0		--	--		--	--		--	--		--	--		--	--		--	--		--	--		--	--		--	--		--	--
--	--		0	0		--	--		--	--		--	--		--	--		--	--		--	--		--	--		--	--		--	--		--	--
--	--		0	0		--	--		--	--		--	--		--	--		--	--		--	--		--	--		--	--		--	--		--	--
--	--		0	0		--	--		--	--		--	--		--	--		--	--		--	--		--	--		--	--		--	--		--	--
--	--		0	0		--	--		--	--		--	--		--	--		--	--		--	--		--	--		--	--		--	--		--	--
--	--		0	0		--	--		--	--		--	--		--	--		--	--		--	--		--	--		--	--		--	--		--	--
--	--		0	0		--	--		--	--		--	--		--	--		--	--		--	--		--	--		--	--		--	--		--	--
--	--		0	0		--	--		--	--		--	--		--	--		--	--		--	--		--	--		--	--		--	--		--	--
--	--		0	0		--	--		--	--		--	--		--	--		--	--		--	--		--	--		--	--		--	--		--	--
--	--		0	0		--	--		--	--		--	--		--	--		--	--		--	--		--	--		--	--		--	--		--	--
--	--		0	0		--	--		--	--		--	--		--	--		--	--		--	--		--	--		--	--		--	--		--	--
--	--		0	0		--	--		--	--		--	--		--	--		--	--		--	--		--	--		--	--		--	--		--	--
--	--		0	0		--	--		--	--		--	--		--	--		--	--		--	--		--	--		--	--		--	--		--	--
--	--		0	0		--	--		--	--		--	--		--	--		--	--		--	--		--	--		--	--		--	--		--	--
--	--		0	0		--	--		--	--		--	--		--	--		--	--		--	--		--	--		--	--		--	--		--	--
--	--		0	0		--	--		--	--		--	--		--	--		--	--		--	--		--	--		--	--		--	--		--	--
--	--		0	0		--	--		--	--		--	--		--	--		--	--		--	--		--	--		--	--		--	--		--	--
--	--		0.00831	0.00343		--	--		--	--		--	--		--	--		--	--		--	--		--	--		--	--		--	--		--	--
--	--		0.02494	0.01318		--	--		--	--		--	--		--	--		--	--		--	--		--	--		--	--		--	--		--	--
--	--		0.04156	0.02495		--	--		--	--		--	--		--	--		--	--		--	--		--	--		--	--		--	--		--	--
--	--		0.03471	0.02692		--	--		--	--		--	--		--	--		--	--		--	--		--	--		--	--		--	--		--	--
--	--		0.02589	0.02896		--	--		--	--		--	--		--	--		--	--		--	--		--	--		--	--		--	--		--	--
--	--		0.03289	0.0301		--	--		--	--		--	--		--	--		--	--		--	--		--	--		--	--		--	--		--	--
--	--		0.03566	0.0304		--	--		--	--		--	--		--	--		--	--		--	--		--	--		--	--		--	--		--	--
--	--		0.0312	0.03062		--	--		--	--		--	--		--	--		--	--		--	--		--	--		--	--		--	--		--	--
--	--		0.03049	0.03068		--	--		--	--		--	--		--	--		--	--		--	--		--	--		--	--		--	--		--	--
--	--		0.03106	0.03065		--	--		--	--		--	--		--	--		--	--		--	--		--	--		--	--		--	--		--	--
--	--		0.02736	0.03056		--	--		--	--		--	--		--	--		--	--		--	--		--	--		--	--		--	--		--	--
--	--		0.029	0.03047		--	--		--	--		--	--		--	--		--	--		--	--		--	--		--	--		--	--		--	--
--	--		0.03012	0.03043		--	--		--	--		--	--		--	--		--	--		--	--		--	--		--	--		--	--		--	--
--	--		0.02696	0.0306		--	--		--	--		--	--		--	--		--	--		--	--		--	--		--	--		--	--		--	--
--	--		0.02745	0.03083		--	--		--	--		--	--		--	--		--	--		--	--		--	--		--	--		--	--		--	--
--	--		0.0263	0.03101		--	--		--	--		--	--		--	--		--	--		--	--		--	--		--	--		--	--		--	--
--	--		0.02297	0.03103		--	--		--	--		--	--		--	--		--	--		--	--		--	--		--	--		--	--		--	--
--	--		0.02201	0.03107		--	--		--	--		--	--		--	--		--	--		--	--		--	--		--	--		--	--		--	--
--	--		0.02258	0.03104		--	--		--	--		--	--		--	--		--	--		--	--		--	--		--	--		--	--		--	--
--	--		0.02319	0.03104		--	--		--	--		--	--		--	--		--	--		--	--		--	--		--	--		--	--		--	--
--	--		0.01742	0.0311		--	--		--	--		--	--		--	--		--	--		--	--		--	--		--	--		--	--		--	--
--	--		0.0169	0.03126		--	--		--	--		--	--		--	--		--	--		--	--		--	--		--	--		--	--		--	--
--	--		0.01724	0.03141		--	--		--	--		--	--		--	--		--	--		--	--		--	--		--	--		--	--		--	--
--	--		1.18227	0.1004		--	--		--	--		--	--		--	--		--	--		--	--		--	--		--	--		--	--		--	--
--	--		1.15091	0.10581		--	--		--	--		--	--		--	--		--	--		--	--		--	--		--	--		--	--		--	--
--	--		1.11956	0.11096		--	--		--	--		--	--		--	--		--	--		--	--		--	--		--	--		--	--		--	--
--	--		1.09981	0.34845		--	--		--	--		--	--		--	--		--	--		--	--		--	--		--	--		--	--		--	--
--	--		1.09167	0.87987		--	--		--	--		--	--		--	--		--	--		--	--		--	--		--	--		--	--		--	--
--	--		1.08353	1.10981		--	--		--	--		--	--		--	--		--	--		--	--		--	--		--	--		--	--		--	--
--	--		0.66299	1.00588		--	--		--	--		--	--		--	--		--	--		--	--		--	--		--	--		--	--		--	--
--	--		0.67244	0.94882		--	--		--	--		--	--		--	--		--	--		--	--		--	--		--	--		--	--		--	--
--	--		0.61235	0.90582		--	--		--	--		--	--		--	--		--	--		--	--		--	--		--	--		--	--		--	--
--	--		0.59147	0.84739		--	--		--	--		--	--		--	--		--	--		--	--		--	--		--	--		--	--		--	--
--	--		0.5583	0.79809		--	--		--	--		--	--		--	--		--	--		--	--		--	--		--	--		--	--		--	--
--	--		0.53602	0.81119		--	--		--	--		--	--		--	--		--	--		--	--		--	--		--	--		--	--		--	--
--	--		0.36681	0.82313		--	--		--	--		--	--		--	--		--	--		--	--		--	--		--	--		--	--		--	--
--	--		0.46858	0.84359		--	--		--	--		--	--		--	--		--	--		--	--		--	--		--	--		--	--		--	--
--	--		0.58147	0.85346		--	--		--	--		--	--		--	--		--	--		--	--		--	--		--	--		--	--		--	--
--	--		0.27056	0.82894		--	--		--	--		--	--		--	--		--	--		--	--		--	--		--	--		--	--		--	--
--	--		0.35755	0.82773		--	--		--	--		--	--		--	--		--	--		--	--		--	--		--	--		--	--		--	--
--	--		0.40682	0.77726		--	--		--	--		--	--		--	--		--	--		--	--		--	--		--	--		--	--		--	--
--	--		0.37388	0.7529		--	--		--	--		--	--		--	--		--	--		--	--		--	--		--	--		--	--		--	--
--	--		0.32814	0.81201		--	--		--	--		--	--		--	--		--	--		--	--		--	--		--	--		--	--		--	--
--	--		0.46242	0.97471		--	--		--	--		--	--		--	--		--	--		--	--		--	--		--	--		--	--		--	--
--	--		0.45959	1.07787		--	--		--	--		--	--		--	--		--	--		--	--		--	--		--	--		--	--		--	--
--	--		0.55463	0.93504		--	--		--	--		--	--		--	--		--	--		--	--		--	--		--	--		--	--		--	--
--	--		0.45357	0.8282		--	--		--	--		--	--		--	--		--	--		--	--		--	--		--	--		--	--		--	--
--	--		0.38737	0.76424		--	--		--	--		--	--		--	--		--	--		--	--		--	--		--	--		--	--		--	--
--	--		0.3991	0.7286		--	--		--	--		--	--		--	--		--	--		--	--		--	--		--	--		--	--		--	--
--	--		4.76057	6.67708		--	--		--	--		--	--		--	--		--	--		--	--		--	--		--	--		--	--		--	--
--	--		5.78994	7.6294		--	--		--	--		--	--		--	--		--	--		--	--		--	--		--	--		--	--		--	--
--	--		6.81932	8.47656		--	--		--	--		--	--		--	--		--	--		--	--		--	--		--	--		--	--		--	--
--	--		7.4861	8.97089		--	--		--	--		--	--		--	--		--	--		--	--		--	--		--	--		--	--		--	--
--	--		7.79029	9.19949		--	--		--	--		--	--		--	--		--	--		--	--		--	--		--	--		--	--		--	--
--	--		8.09449	9.44591		--	--		--	--		--	--		--	--		--	--		--	--		--	--		--	--		--	--		--	--
--	--		9.07913	10.2196		--	--		--	--		--	--		--	--		--	--		--	--		--	--		--	--		--	--		--	--
--	--		10.5417	10.9538		--	--		--	--		--	--		--	--		--	--		--	--		--	--		--	--		--	--		--	--
--	--		10.8763	11.7026		--	--		--	--		--	--		--	--		--	--		--	--		--	--		--	--		--	--		--	--
--	--		11.9829	12.368		--	--		--	--		--	--		--	--		--	--		--	--		--	--		--	--		--	--		--	--
--	--		12.9703	12.8746		--	--		--	--		--	--		--	--		--	--		--	--		--	--		--	--		--	--		--	--
--	--		12.2512	13.0948		--	--		--	--		--	--		--	--		--	--		--	--		--	--		--	--		--	--		--	--
--	--		11.4638	13.2956		--	--		--	--		--	--		--	--		--	--		--	--		--	--		--	--		--	--		--	--
--	--		12.1688	13.5775		--	--		--	--		--	--		--	--		--	--		--	--		--	--		--	--		--	--		--	--
--	--		12.8453	13.8619		--	--		--	--		--	--		--	--		--	--		--	--		--	--		--	--		--	--		--	--
--	--		14.4437	14.1289		--	--		--	--		--	--		--	--		--	--		--	--		--	--		--	--		--	--		--	--
--	--		15.3822	14.6076		--	--		--	--		--	--		--	--		--	--		--	--		--	--		--	--		--	--		--	--
--	--		14.5494	15.1358		--	--		--	--		--	--		--	--		--	--		--	--		--	--		--	--		--	--		--	--
--	--		16.1469	15.6005		--	--		--	--		--	--		--	--		--	--		--	--		--	--		--	--		--	--		--	--
--	--		17.4092	16.0903		--	--		--	--		--	--		--	--		--	--		--	--		--	--		--	--		--	--		--	--
--	--		16.8091	16.4364		--	--		--	--		--	--		--	--		--	--		--	--		--	--		--	--		--	--		--	--
--	--		17.5885	17.2752		--	--		--	--		--	--		--	--		--	--		--	--		--	--		--	--		--	--		--	--
--	--		20.3041	18.0202		--	--		--	--		--	--		--	--		--	--		--	--		--	--		--	--		--	--		--	--
--	--		20.3522	18.9669		--	--		--	--		--	--		--	--		--	--		--	--		--	--		--	--		--	--		--	--
--	--		22.3956	19.6892		--	--		--	--		--	--		--	--		--	--		--	--		--	--		--	--		--	--		--	--
--	--		23.9593	20.5146		--	--		--	--		--	--		--	--		--	--		--	--		--	--		--	--		--	--		--	--
--	--		4.01783	1.29666		--	--		--	--		--	--		--	--		--	--		--	--		--	--		--	--		--	--		--	--
--	--		4.09346	1.31148		--	--		--	--		--	--		--	--		--	--		--	--		--	--		--	--		--	--		--	--
--	--		4.1691	1.32704		--	--		--	--		--	--		--	--		--	--		--	--		--	--		--	--		--	--		--	--
--	--		4.19415	1.66172		--	--		--	--		--	--		--	--		--	--		--	--		--	--		--	--		--	--		--	--
--	--		4.16861	2.31732		--	--		--	--		--	--		--	--		--	--		--	--		--	--		--	--		--	--		--	--
--	--		4.14306	2.99016		--	--		--	--		--	--		--	--		--	--		--	--		--	--		--	--		--	--		--	--
--	--		4.53613	2.99541		--	--		--	--		--	--		--	--		--	--		--	--		--	--		--	--		--	--		--	--
--	--		4.17037	2.99825		--	--		--	--		--	--		--	--		--	--		--	--		--	--		--	--		--	--		--	--
--	--		4.55668	3.85655		--	--		--	--		--	--		--	--		--	--		--	--		--	--		--	--		--	--		--	--
--	--		4.59883	5.5673		--	--		--	--		--	--		--	--		--	--		--	--		--	--		--	--		--	--		--	--
--	--		4.82703	7.27294		--	--		--	--		--	--		--	--		--	--		--	--		--	--		--	--		--	--		--	--
--	--		4.84561	7.39414		--	--		--	--		--	--		--	--		--	--		--	--		--	--		--	--		--	--		--	--
--	--		5.2116	7.51704		--	--		--	--		--	--		--	--		--	--		--	--		--	--		--	--		--	--		--	--
--	--		5.13714	7.72911		--	--		--	--		--	--		--	--		--	--		--	--		--	--		--	--		--	--		--	--
--	--		5.32268	8.03816		--	--		--	--		--	--		--	--		--	--		--	--		--	--		--	--		--	--		--	--
--	--		6.22676	8.35169		--	--		--	--		--	--		--	--		--	--		--	--		--	--		--	--		--	--		--	--
--	--		6.57822	8.63241		--	--		--	--		--	--		--	--		--	--		--	--		--	--		--	--		--	--		--	--
--	--		7.52121	8.92004		--	--		--	--		--	--		--	--		--	--		--	--		--	--		--	--		--	--		--	--
--	--		7.65813	9.27645		--	--		--	--		--	--		--	--		--	--		--	--		--	--		--	--		--	--		--	--
--	--		8.34223	9.69575		--	--		--	--		--	--		--	--		--	--		--	--		--	--		--	--		--	--		--	--
--	--		9.38604	10.1201		--	--		--	--		--	--		--	--		--	--		--	--		--	--		--	--		--	--		--	--
--	--		9.39061	10.4181		--	--		--	--		--	--		--	--		--	--		--	--		--	--		--	--		--	--		--	--
[truncated: 3,540 more rows]

## Sheet: figure 5
	Western Euorpe							North America							Africa							Asia							South America							Oceania							China
Unit:kg/ha	In			Out				In			Out				In			Out				In			Out				In			Out				In			Out				In			Out
Year	fertilizer	manure	deposition	uptake	runoff	Agronomic budget	Biogeochemical budget	fertilizer	manure	deposition	uptake	runoff	Agronomic budget	Biogeochemical budget	fertilizer	manure	deposition	uptake	runoff	Agronomic budget	Biogeochemical budget	fertilizer	manure	deposition	uptake	runoff	Agronomic budget	Biogeochemical budget	fertilizer	manure	deposition	uptake	runoff	Agronomic budget	Biogeochemical budget	fertilizer	manure	deposition	uptake	runoff	Agronomic budget	Biogeochemical budget	fertilizer	manure	deposition	uptake	runoff	Agronomic budget	Biogeochemical budget
1900	1.76326	2.60873	0.0443622	-3.66282	-2.36761	0.709168	-1.61408	0.685151	0.70813	0.0075236	-2.82121	-0.956619	-1.42793	-2.37702	0.0973012	0.855597	0.117603	-0.75768	-1.22859	0.195218	-0.915769	0.109303	3.03499	0.0688498	-2.34933	-1.1866	0.794964	-0.322786	0.317304	4.93538	0.0259999	-2.91288	-2.59748	2.3398	-0.231678	6.78383	3.61403	0.0199874	-1.07215	-1.49737	9.32571	7.84833	0.00803331	0.829582	0.0636661	-2.72482	-1.15829	-1.88721	-2.98183
1910	1.685	2.47702	0.0444109	-3.71919	-2.37884	0.442823	-1.8916	0.604855	0.625139	0.00746567	-2.82456	-0.95757	-1.59457	-2.54467	0.0907939	0.798438	0.116035	-0.77297	-1.26043	0.116262	-1.02813	0.1041	2.89744	0.067794	-2.36053	-1.20543	0.641008	-0.496632	0.229397	3.22977	0.0241457	-3.23409	-2.2446	0.22508	-1.99537	3.76755	2.28716	0.0206151	-1.13936	-1.36904	4.91535	3.56693	0.00777785	0.803198	0.063671	-2.69111	-1.15187	-1.88013	-2.96833
1920	1.67885	2.44585	0.0451476	-3.68802	-2.44905	0.436681	-1.96722	0.546844	0.565184	0.00748059	-2.76415	-0.953941	-1.65212	-2.59858	0.0823423	0.724239	0.113911	-0.77918	-1.27657	0.0274013	-1.13526	0.0982671	2.70967	0.0665595	2.34206	-1.22392	5.15	3.99264	0.150641	2.00946	0.0224939	-3.13917	-1.91717	-0.979071	-2.87374	2.01269	0.401657	0.0210557	-1.14464	-1.23166	1.26971	0.0591035	0.00753311	0.777927	0.0636774	-2.68246	-1.14579	-1.897	-2.97911
1930	1.62123	2.34423	0.0455734	-3.67233	-2.4853	0.293126	-2.1466	0.509463	0.526547	0.00746982	-2.73717	-0.951874	-1.70116	-2.64556	0.0743314	0.654265	0.111557	-0.78519	-1.28912	-0.056594	-1.23415	0.0923171	2.48483	0.0658658	-2.32728	-1.23923	0.249871	-0.923495	0.100541	1.34116	0.021646	-2.94638	-1.62994	-1.50468	-3.11297	1.80051	0.35939	0.0210402	-1.13878	-1.26115	1.02112	-0.21899	0.00736609	0.760681	0.0636811	-2.67571	-1.1398	-1.90766	-2.98378
1940	10.493	3.04269	0.0460511	-3.87442	-2.58185	9.66125	7.12544	3.5095	0.599641	0.00747427	-2.82898	-0.959051	1.28016	0.328582	0.443567	1.0946	0.109611	-0.8028	-1.29808	0.735369	-0.453105	0.572578	4.15794	0.0646868	-2.346	-1.28232	2.38452	1.16689	0.563862	2.44731	0.02121	-3.53657	-1.81286	-0.525403	-2.31705	10.754	0.551556	0.0210249	-1.20185	-1.33658	10.1038	8.78819	0.0488877	1.15989	0.0636802	-2.68561	-1.13532	-1.47683	-2.54847
1950	10.2654	3.02601	0.046201	-3.86707	-2.69199	9.42436	6.77858	3.27987	0.560404	0.00745225	-2.83278	-0.970116	1.00749	0.0448276	0.394258	0.973244	0.10712	-0.82144	-1.30997	0.546062	-0.65679	0.5447	3.84448	0.0646138	-2.36054	-1.31578	2.02864	0.777477	0.569559	2.47203	0.0218436	-3.32584	-1.9657	-0.284251	-2.22811	9.63187	0.490641	0.0209749	-1.20756	-1.41264	8.91495	7.52329	0.0486838	1.15506	0.063676	-2.68355	-1.13198	-1.47981	-2.54811
1960	15.3668	4.9683	0.0462885	-6.80299	-2.81117	13.5321	10.7672	5.05573	1.59123	0.00746064	-4.54138	-0.985974	2.10558	1.12707	0.677493	1.44947	0.105638	-1.84807	-1.68153	0.278892	-1.297	1.25702	2.61809	0.0632769	-3.91829	-1.4946	-0.0431771	-1.4745	1.62481	3.53114	0.0218811	-5.35309	-2.10635	-0.197143	-2.28161	11.6284	1.71192	0.0209981	-2.00787	-1.47035	11.3324	9.88309	0.619146	2.48528	0.06367	-5.22323	-1.75933	-2.1188	-3.81447
1970	17.4357	5.10058	0.0470938	-9.6201	-3.29991	12.9162	9.66337	8.53164	1.7042	0.00806319	-5.90872	-1.02246	4.32712	3.31272	1.40578	1.81501	0.10467	-2.1119	-1.78443	1.10889	-0.570872	3.45451	3.34534	0.0643848	-4.92822	-1.73301	1.87162	0.202995	3.4046	3.44454	0.0241103	-5.30339	-2.35221	1.54575	-0.782349	9.97427	2.23771	0.0223908	-2.39098	-1.33032	9.82101	8.51308	4.39219	4.75046	0.0646997	-7.79093	-2.31286	1.35173	-0.896437
1980	18.9084	5.50226	0.0478985	-11.7258	-3.30285	12.6848	9.42988	10.0841	1.76348	0.00812071	-7.27447	-1.05543	4.57307	3.52576	2.49966	1.95591	0.104497	-2.38607	-1.81065	2.0695	0.363352	6.84324	4.08471	0.0639363	-5.77325	-1.73172	5.1547	3.48692	9.7383	4.13339	0.0237185	-6.12341	-2.34943	7.74827	5.42256	8.58646	2.15577	0.0213781	-2.38309	-1.53993	8.35914	6.84059	11.5868	6.14694	0.0628993	-9.6239	-2.20428	8.10981	5.96843
1990	15.2832	5.28962	0.0488773	-13.5419	-3.44397	7.03085	3.63576	7.97227	1.6336	0.00798083	-7.7361	-1.0737	1.86978	0.804063	2.16176	2.30078	0.104212	-2.56984	-1.86941	1.8927	0.127498	12.0783	4.77738	0.062337	-6.96708	-2.16323	9.88862	7.78772	6.49279	4.73596	0.0239396	-7.37001	-2.39689	3.85873	1.48578	5.63332	2.01249	0.0210325	-2.6642	-1.60054	4.98161	3.4021	19.0692	6.27992	0.0613368	-10.7202	-3.40149	14.6289	11.2888
2000	11.2899	4.91387	0.0499273	-13.4899	-3.53956	2.7139	-0.775735	8.39282	2.50245	0.00809108	-8.34472	-1.09377	2.55055	1.46488	1.6658	2.54162	0.106448	-2.68703	-1.80172	1.52039	-0.174889	13.8526	5.81876	0.0618529	-8.23198	-2.57776	11.4394	8.92346	11.3809	5.50179	0.0240469	-8.52226	-2.37386	8.3604	6.01059	11.3852	1.632	0.0210574	-3.27204	-1.89785	9.74518	7.86839	24.8273	8.57183	0.0600417	-12.823	-4.3203	20.5762	16.3159
2010	6.18057	4.61264	0.0502319	-12.8366	-3.57228	-2.04341	-5.56546	7.69611	2.50032	0.00805736	-8.67913	-1.10796	1.5173	0.417402	2.15061	3.14996	0.105964	-2.88993	-1.77329	2.41064	0.74332	15.9242	6.37892	0.0617246	-8.93481	-2.67676	13.3683	10.7533	16.1925	6.47184	0.0239915	-10.7308	-2.47516	11.9336	9.48242	8.07215	2.79826	0.0216115	-3.10143	-2.34428	7.76898	5.4463	21.3795	9.73369	0.0593759	-13.425	-4.43945	17.6882	13.3081
[truncated: 21 more columns]

## Sheet: figure 7
Unit:kg P/ha	Western Euorpe				North America				Africa				Asia				South America				Oceania				China				US				South Africa				France				Russia				Central Europe
Year	LP	SP	TP		LP	SP	TP		LP	SP	TP		LP	SP	TP		LP	SP	TP		LP	SP	TP		LP	SP	TP		LP	SP	TP		LP	SP	TP		LP	SP	TP		LP	SP	TP		LP	SP	TP
1900	259.8	2409.34	2669.14		136.731	1911.79	2048.52		212.634	2223.8	2436.43		202.037	2179.04	2381.08		179.49	1836.83	2016.32		185.26	2058.2	2243.46		169.524	1710.62	1880.14		128.627	1799.74	1928.37		212.989	2251.44	2464.43		254.66	2451.53	2706.19		136.782	1885.98	2022.76		146.147	1751.96	1898.11
1910	265.134	2415.54	2680.68		133.805	1896.04	2029.84		217.005	2236.93	2453.94		208.011	2182.35	2390.36		169.215	1762.2	1931.41		204.345	2117.5	2321.85		164.844	1703.25	1868.09		125.998	1796.16	1922.16		222.947	2270.64	2493.59		257.065	2455.25	2712.31		135.778	1884.77	2020.55		144.778	1751.43	1896.21
1920	269.298	2443.64	2712.93		134.824	1919.84	2054.66		217.031	2239.2	2456.23		207.922	2187.03	2394.95		159.178	1736.65	1895.83		190.847	2142.36	2333.21		163.389	1692.99	1856.38		124.946	1789.96	1914.91		220.913	2284.7	2505.62		258.376	2459.93	2718.3		135.707	1882.91	2018.62		146.732	1768.47	1915.2
1930	272.069	2466.1	2738.17		135.032	1927.46	2062.49		216.482	2238.47	2454.95		207.895	2200.72	2408.62		150.906	1706.6	1857.51		190.449	2156.33	2346.78		162.185	1682.55	1844.73		124.222	1783.4	1907.63		218.456	2290.08	2508.53		259.119	2467.13	2726.25		135.465	1881.25	2016.71		145.073	1760.79	1905.86
1940	314.49	2518.92	2833.41		147.03	1931.91	2078.94		219.703	2240.6	2460.3		216.879	2219.21	2436.09		159.577	1735.38	1894.95		229.664	2201.34	2431.01		162.808	1673.27	1836.08		138.374	1788.76	1927.13		236.722	2308.65	2545.37		288.431	2498.56	2786.99		139.449	1883.95	2023.4		152.753	1776.51	1929.26
1950	329.275	2617.22	2946.49		149.621	1956.47	2106.09		219.334	2242.1	2461.43		220.05	2250.91	2470.96		168.3	1783.85	1952.15		236.559	2276.58	2513.14		162.224	1666.06	1828.28		141.148	1810.43	1951.58		232.412	2327.24	2559.65		298.937	2563.15	2862.09		141.063	1890.57	2031.63		156.163	1811.32	1967.48
1960	361.232	2730.34	3091.57		158.966	1992.42	2151.39		221.232	2247.9	2469.13		214.404	2268.1	2482.51		178.734	1825.1	2003.84		250.884	2332.55	2583.43		163.06	1662.97	1826.03		151.101	1842.61	1993.71		237.07	2341.89	2578.96		344.522	2662.55	3007.08		146.248	1901.94	2048.18		172.717	1832.99	2005.71
1970	369.553	2859.12	3228.68		170.435	1997.03	2167.46		216.199	2168.85	2385.05		221.743	2297.45	2519.19		158.16	1624.7	1782.86		239.677	2249.29	2488.97		186.354	1711.88	1898.24		165.752	1840.16	2005.91		226.281	2128.09	2354.37		372.767	2890.69	3263.46		155.555	1901.08	2056.63		199.449	1894.6	2094.05
1980	387.454	2983.38	3370.83		180.409	2038.7	2219.11		223.428	2191.05	2414.48		234.377	2305.89	2540.27		184.36	1649.61	1833.97		234.368	2213.73	2448.1		208.197	1781.74	1989.93		175.911	1903.15	2079.06		264.101	2270.86	2534.96		395.92	3036.24	3432.16		178.538	1964.21	2142.74		246.254	2009.04	2255.29
1990	384.047	3093.68	3477.73		174.67	2099.26	2273.93		225.955	2196.26	2422.22		257.101	2340.57	2597.67		187.586	1715.82	1903.41		240.348	2308.33	2548.68		246.616	1905	2151.61		167.627	1966.91	2134.54		261.114	2368.54	2629.65		386.991	3196.69	3583.68		203.356	2036.34	2239.7		251.677	2171.26	2422.93
2000	370.281	3157.86	3528.14		180.157	2133.01	2313.16		223.724	2189.98	2413.71		278.495	2411.03	2689.53		201.377	1784.64	1986.01		249.307	2333.22	2582.53		306.26	2070.27	2376.53		174.028	1996.58	2170.61		255.228	2430.52	2685.75		368.572	3293.61	3662.19		156.411	2031.57	2187.99		193.667	2219.8	2413.46
2010	350.038	3179.93	3529.97		179.853	2176.54	2356.39		222.853	2173.76	2396.61		289.613	2485.29	2774.9		224.744	1839.15	2063.89		250.413	2382.85	2633.27		309.336	2196.52	2505.85		173.107	2039.65	2212.76		254.063	2463.71	2717.78		329.814	3300.21	3630.02		153.072	2051.81	2204.88		204.449	2261.51	2465.96
