# Supplementary figures and images for: Spatiotemporal dynamics of soil phosphorus and crop uptake in global cropland during the 20th century
Source: Copernicus journal article supplement (doi:10.5194/bg-14-2055-2017), 2017-04-20

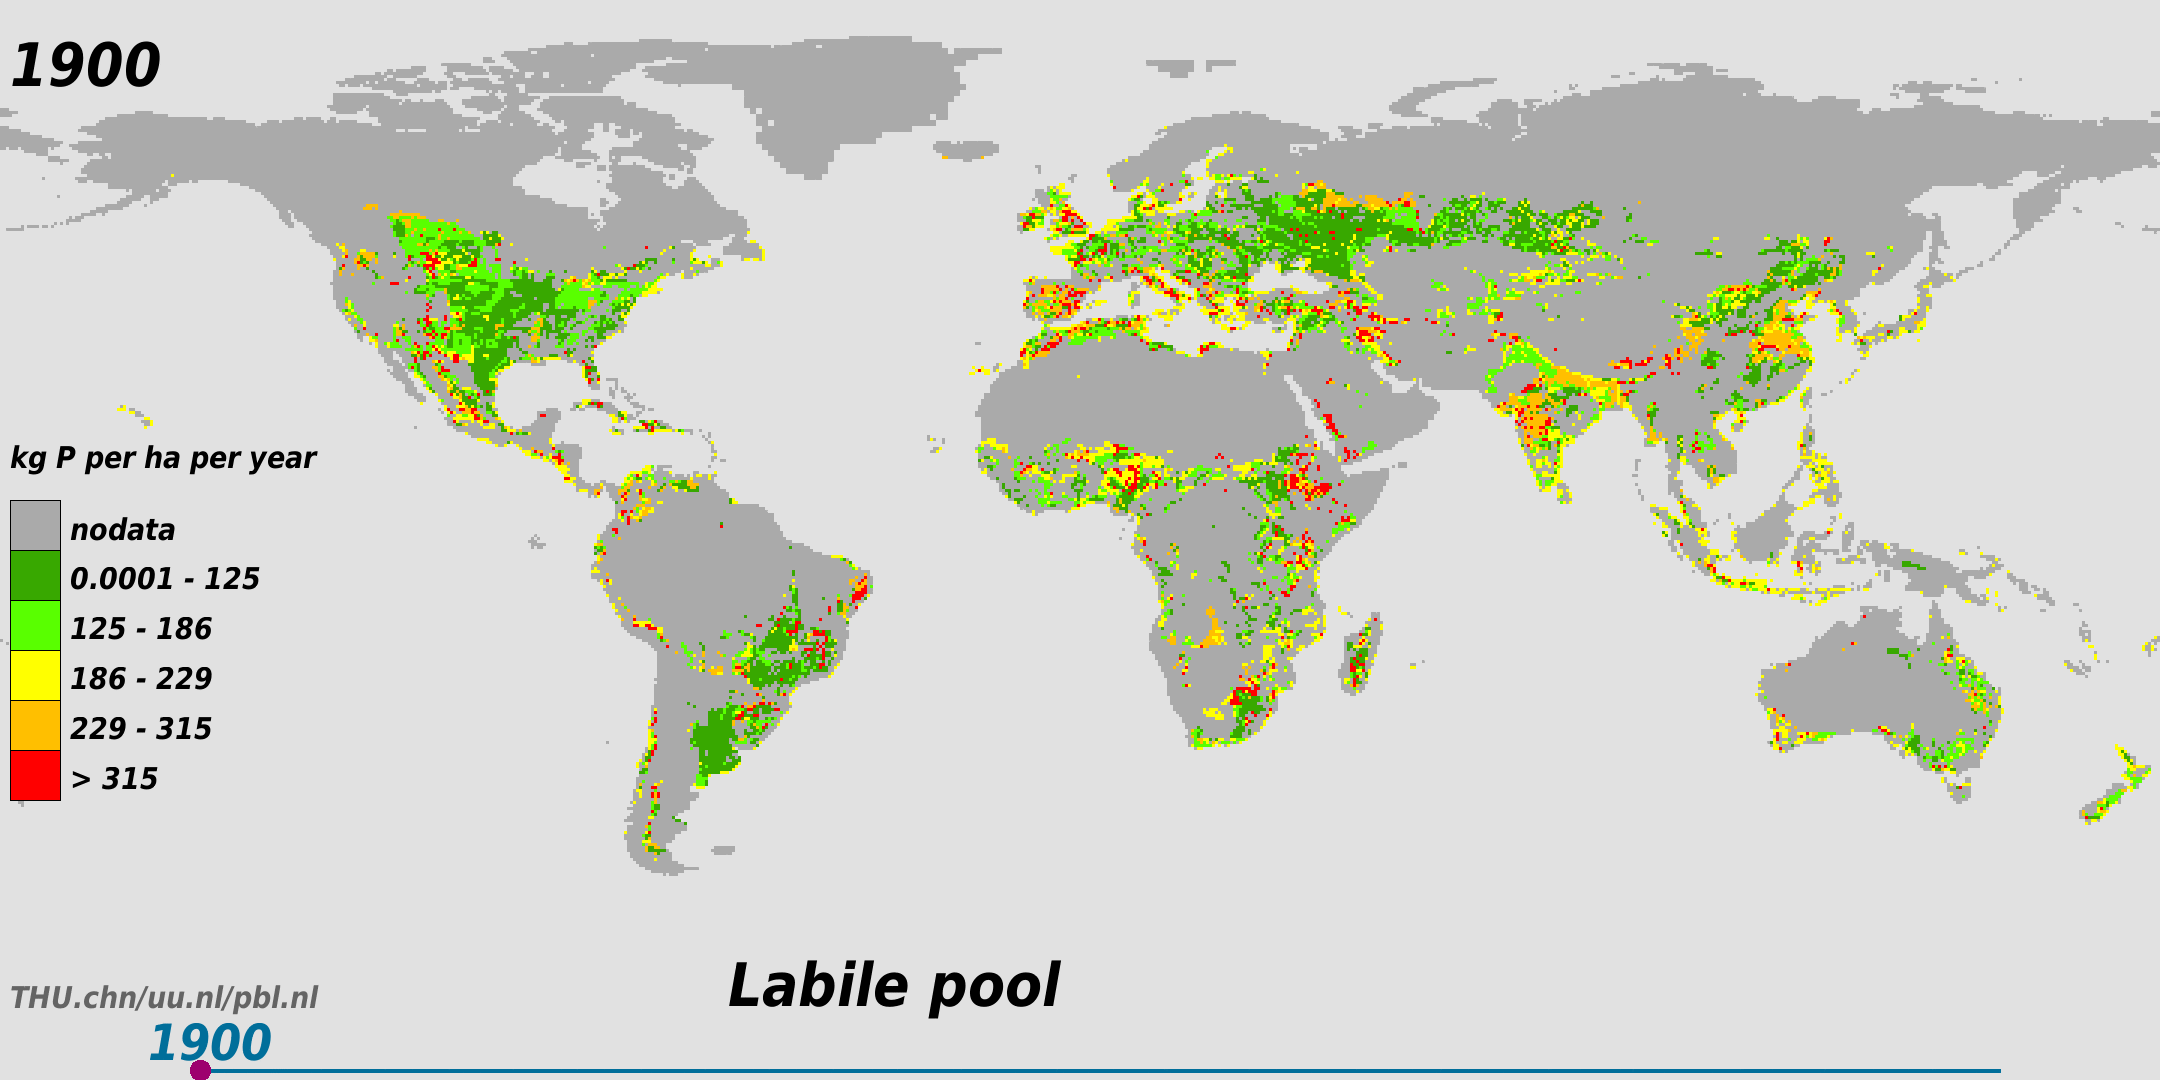

Supplement: Supplementary file 3 [file bg-14-2055-2017-supplement.zip › LP.gif]

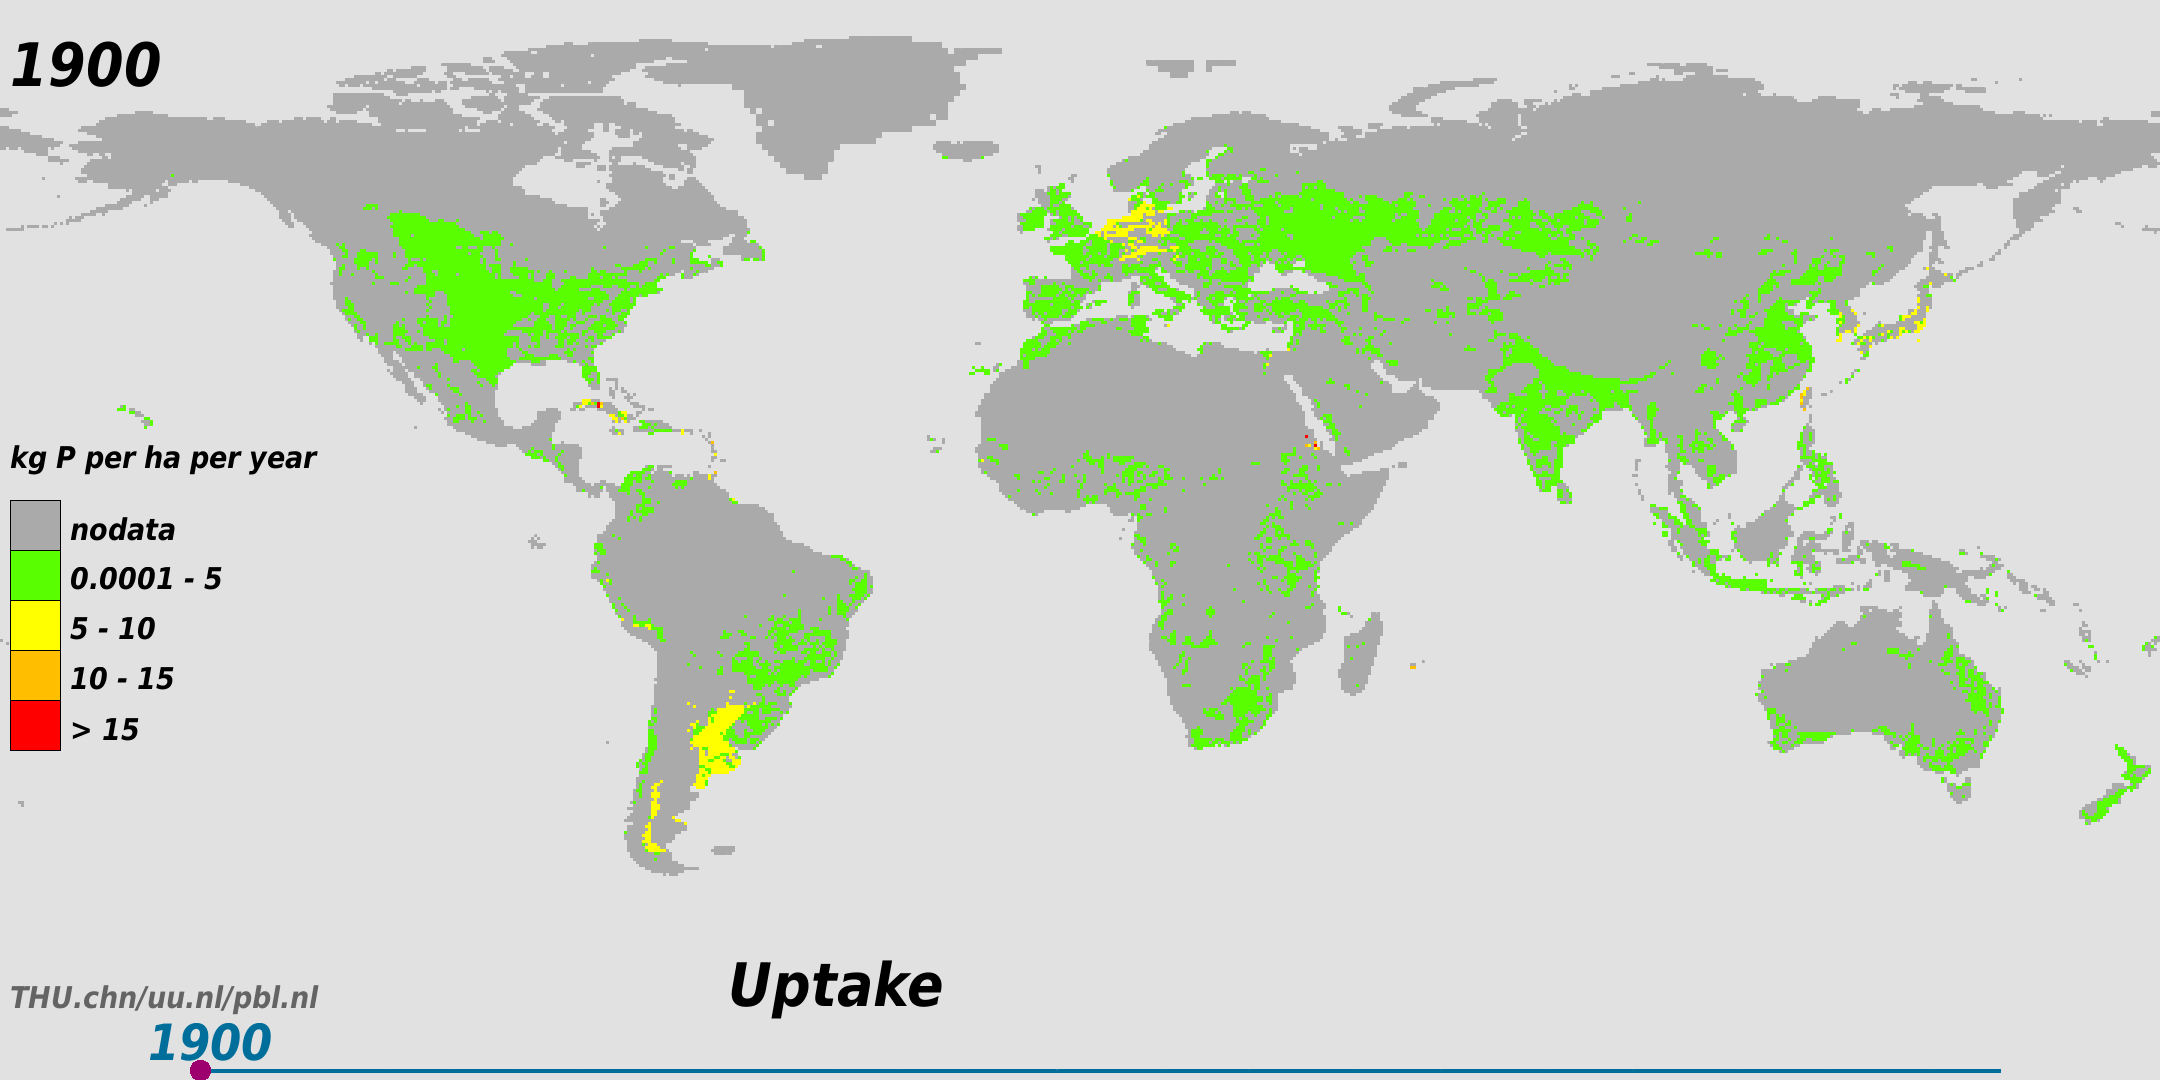

Supplement: Supplementary file 3 [file bg-14-2055-2017-supplement.zip › uptake.gif]

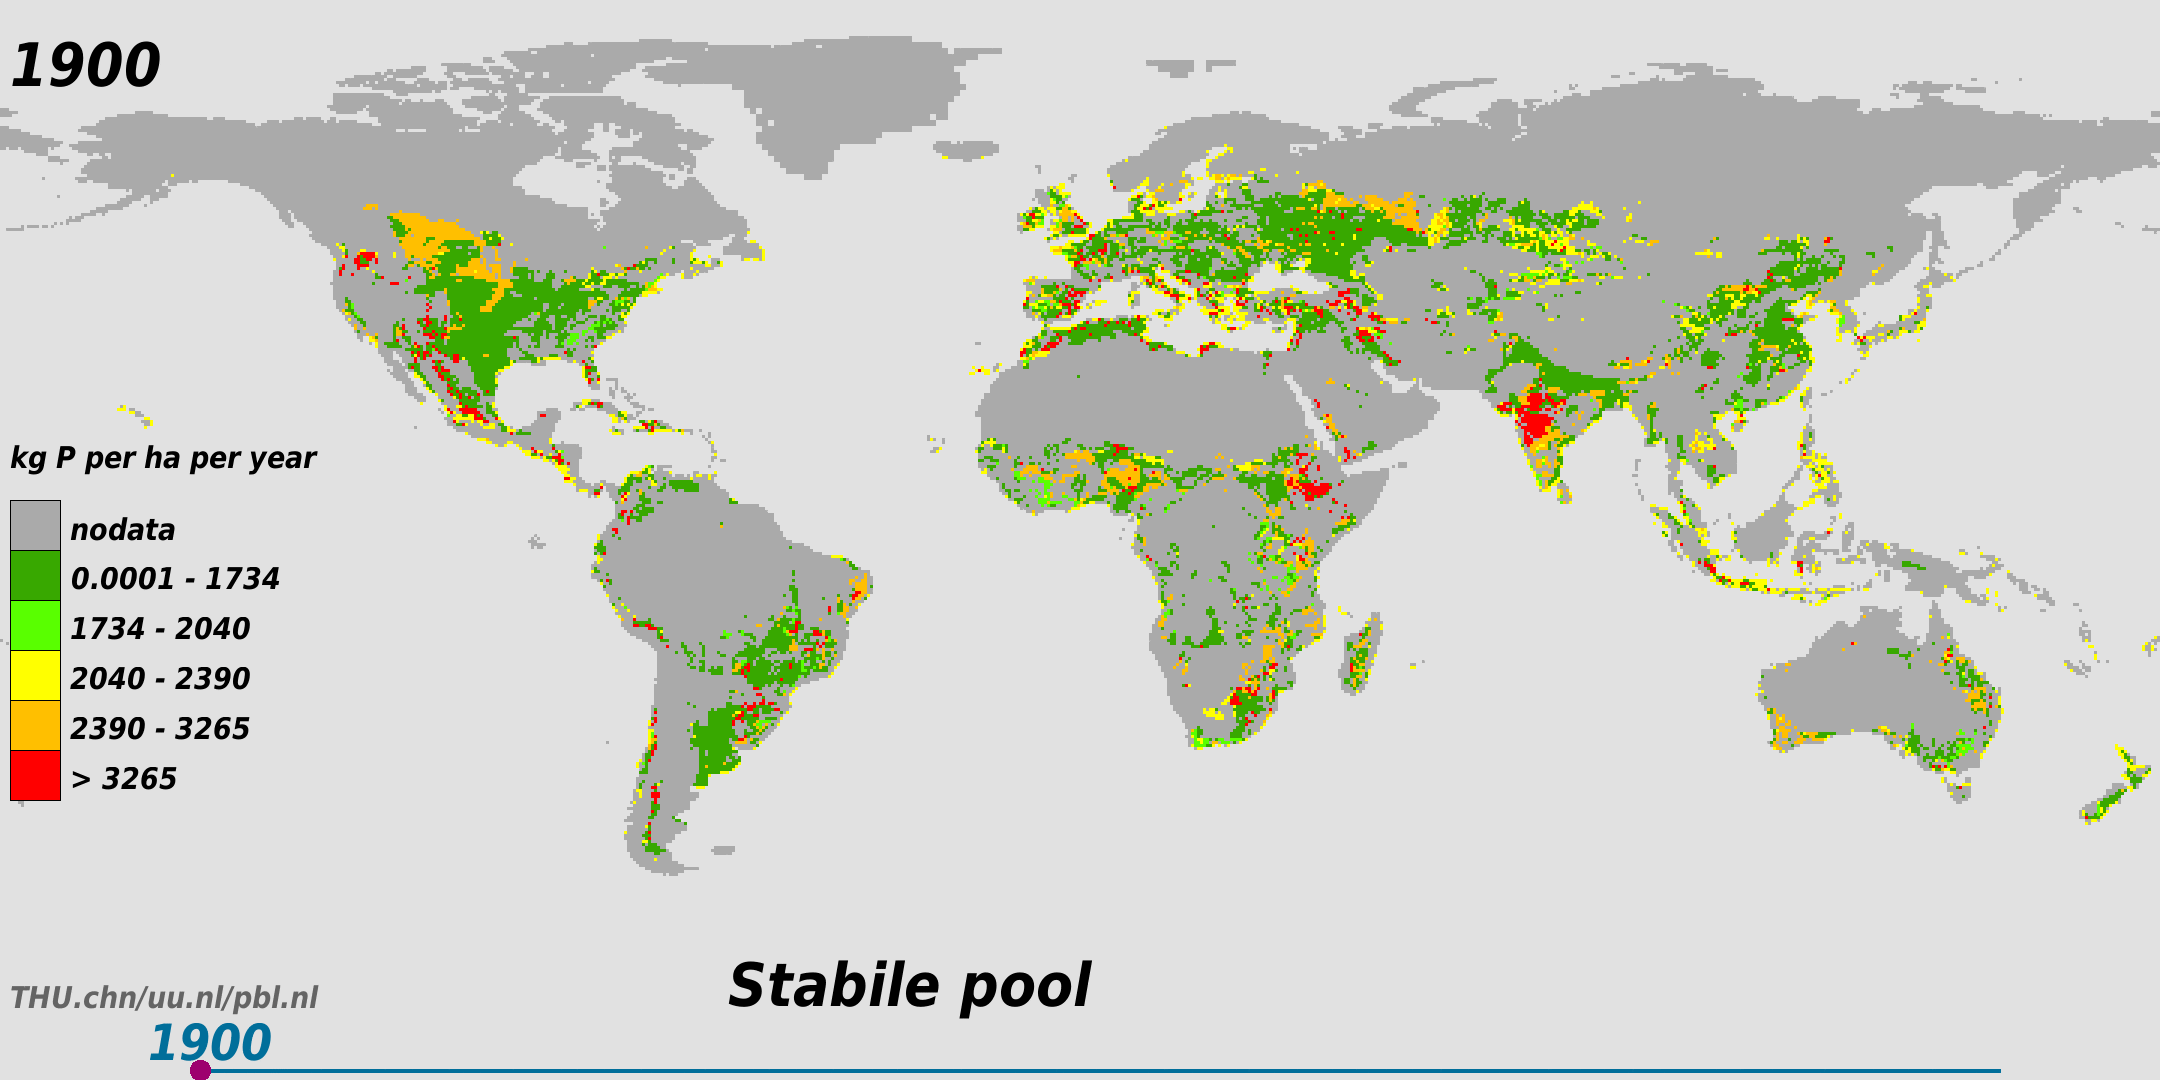

Supplement: Supplementary file 3 [file bg-14-2055-2017-supplement.zip › SP.gif]
